# Supplementary material for: Aqueous solution degradation pathways of trimethylsiloxane surfactants
Source: Royal Society of Chemistry journal article supplement (doi:10.1039/d4va00256c), 2024-09-23
Supplement: d4va00256c1.pdf [file d4va00256c1.pdf]

## Aqueous Solution Degradation Pathways of Trimethylsiloxane Surfactants

Maleigh Mifkovic<sup>1</sup>, Brian D. Etz<sup>2,3</sup>, Manoj K. Shukla<sup>3,\*</sup>, Shubham Vyas<sup>1,\*</sup>

<sup>1</sup>Department of Chemistry, Colorado School of Mines, Golden, CO 80401, USA

<sup>2</sup>Oak Ridge Institute for Science and Education (ORISE), Oak Ridge, TN 37830, USA

<sup>3</sup>Environmental Laboratory, US Army Engineer Research and Development Center, 3909 Halls Ferry Road, Vicksburg, MS 39180, USA

\*Corresponding Authors: [svyas@mines.edu](mailto:svyas@mines.edu), [Manoj.K.Shukla@usace.army.mil](mailto:Manoj.K.Shukla@usace.army.mil)

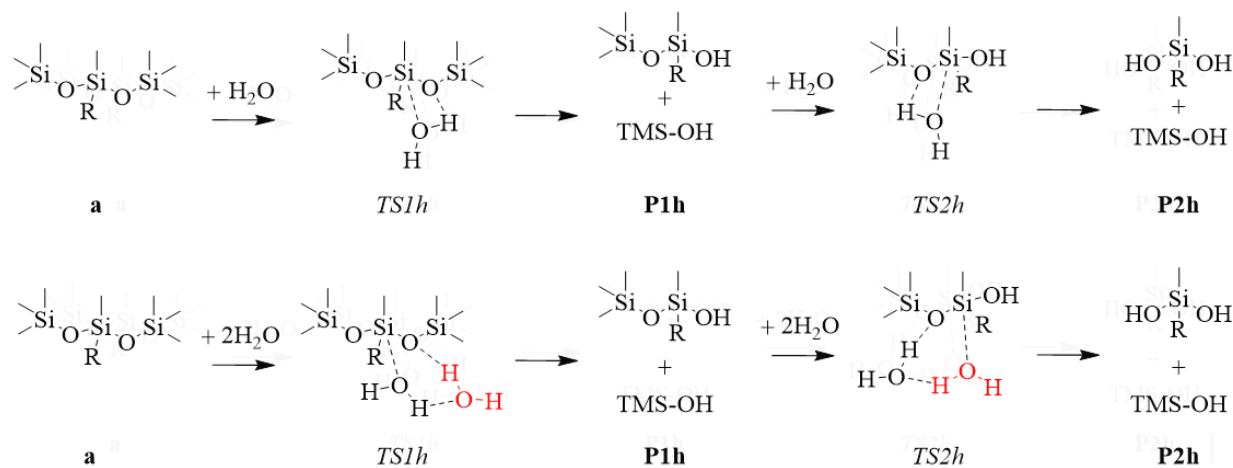

**Figure S1.** Pathways of the neutral hydrolysis of TriSil-1n (a) via attack by one water molecule (top) or with an assisting water molecule (bottom). The assisting water is shown in red. *TS* and **P** refer to the transition state and product complex, respectively.

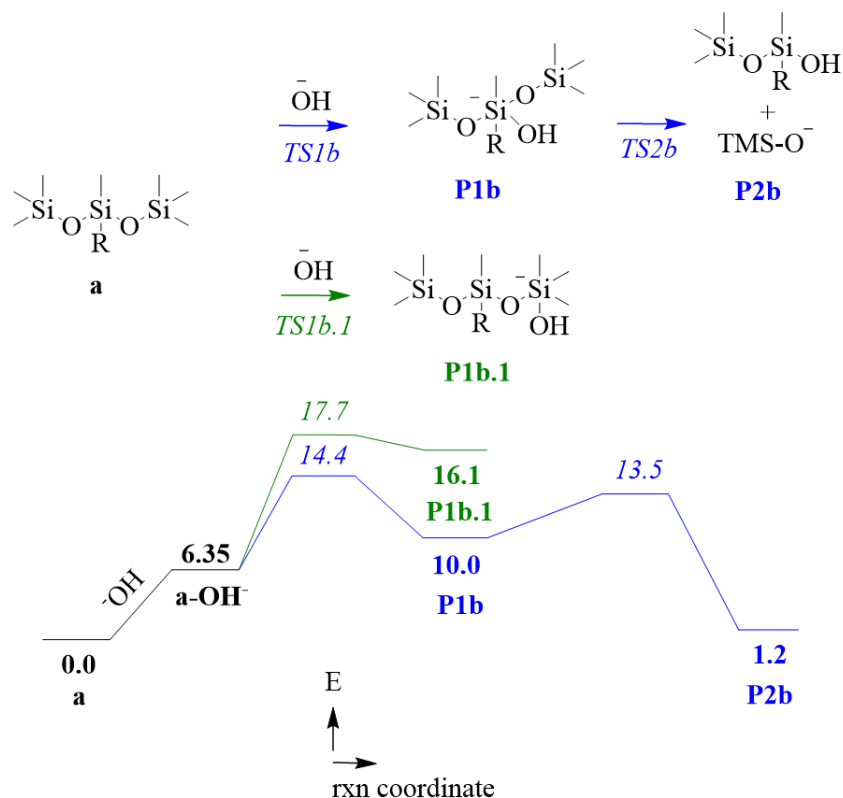

**Figure S2.** Potential energy surfaces for the hydrolysis reactions of TriSil-1n in basic pH conditions, computed at the  $\omega$ b97X-D/6-311+G(2d,2p) level of theory. All energies are presented in kcal/mol and are normalized to TriSil-1n (a). Transition state energy barriers are in italics and product reaction free energies are in bold.

**Table S1.** Partial atomic charges for TriSil-1n (neutral, reactant complex) and in basic conditions, where the hydroxyl radical is either attacking the central silicon (Si-46) or terminal silicon (Si-6 or Si-7) atom (transition state complex). All values are presented in a.u. and all optimization and NBO calculations were performed at the  $\omega$ b97X-D/6-311+G(2d,2p) level of theory in the gas phase.

| Atom label      | TriSil-1n |                             |                              |
|-----------------|-----------|-----------------------------|------------------------------|
|                 | Neutral   | OH attack at the central Si | OH attack at the terminal Si |
| Si-6 (terminal) | 1.91      | 1.94                        | 1.94                         |
| Si-7 (terminal) | 1.90      | 1.92                        | 1.91                         |
| Si-46 (central) | 2.18      | 2.20                        | 2.20                         |

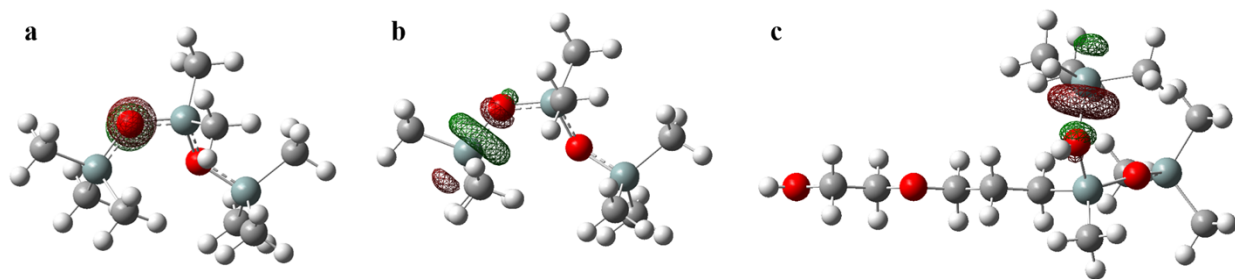

**Figure S3.** a) Highest occupied molecular orbital (HOMO) of PDMS and lowest unoccupied molecular orbital (LUMO) of b) PDMS and c) protonated TriSil-1n. Oxygen atoms are red, silicon atoms are pale blue, carbon atoms are gray, and hydrogen atoms are white. NBO analyses were computed at the  $\omega$ b97X-D/6-311+G(2d,2p) level of theory with SMD water solvation. The molecular orbital isovalue is 0.1 a.u..

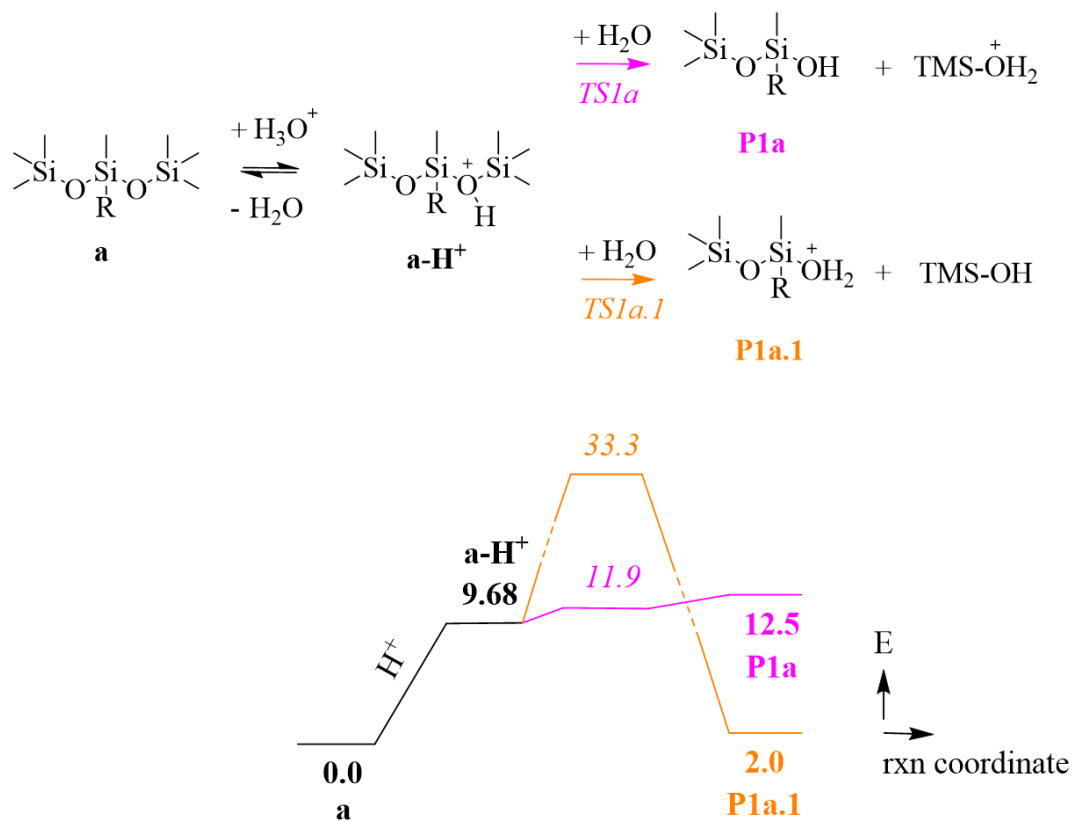

**Figure S4.** Potential energy surfaces for the hydrolysis reactions of TriSil-1n in acidic pH conditions, computed at the  $\omega$ b97X-D/6-311+G(2d,2p) level of theory. All energies are presented in kcal/mol and are normalized to TriSil-1n (a). Transition state energy barriers are in italics and product reaction free energies are in bold.

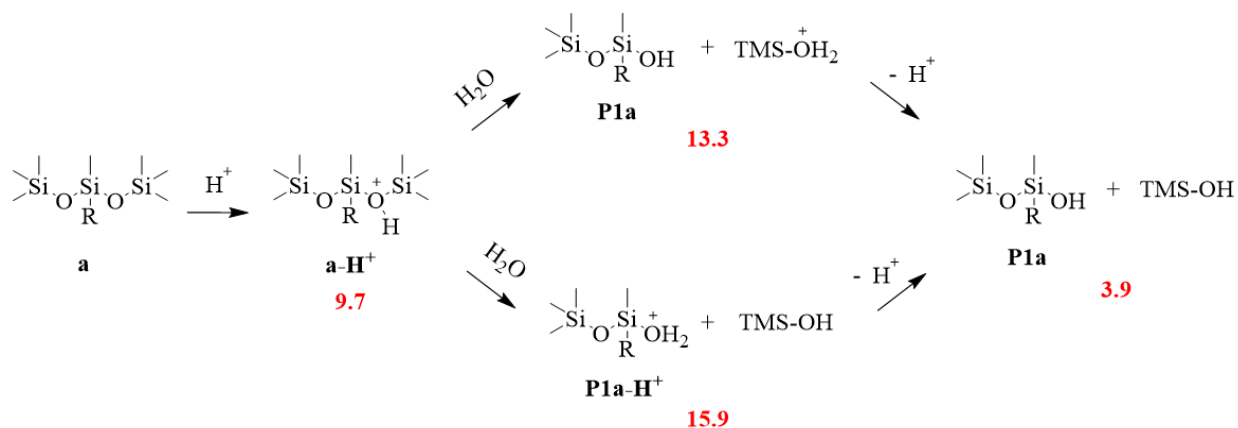

**Figure S5.** Pathways of the hydrolysis of TriSil-1n (**a**) in acidic pH conditions. Reaction energies (shown in red) are presented in kcal/mol and are normalized to the first reaction.

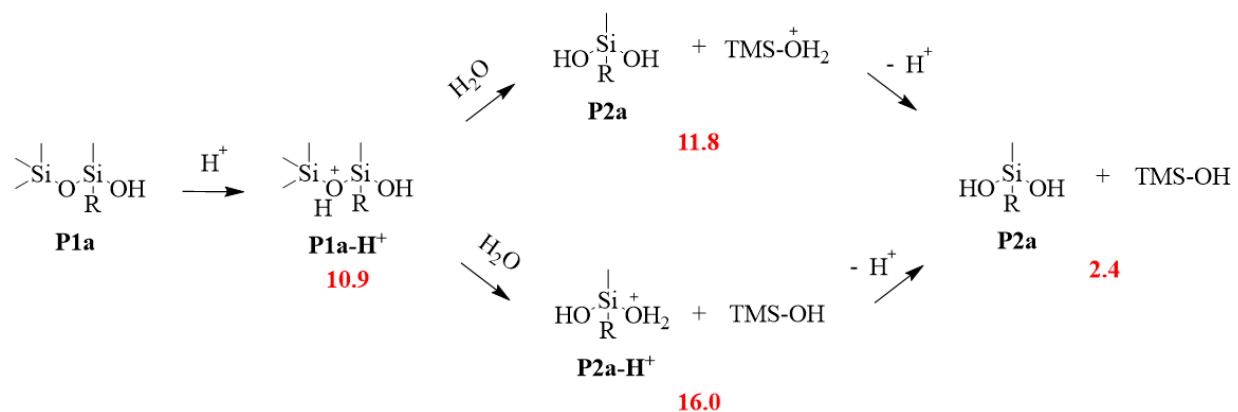

**Figure S6.** Proposed hydrolysis mechanism of TriSil-1n degradation product **P1a** in acidic pH conditions. Reaction energies (shown in red) are presented in kcal/mol and are normalized to the first reaction.

**Table S2.** Transition state energy barriers, product free energies, reaction free energies, and bond dissociation energies (BDEs) for the H-atom abstractions of TriSil-1n via hydroxyl radical at positions a-g (refer to **Figure 1** for atom labels). Calculations were performed at the  $\omega$ b97X-D/6-311+G(2d,2p) level of theory in the gas phase. The \* indicates the reactant and product calculations were performed in the solution phase (implicit SMD water solvation).

| Radical  | Transition state energy barrier (kcal/mol) | Product free energy (kcal/mol) | Reaction free energy (kcal/mol) | Reaction free energy* (kcal/mol) | BDE (kcal/mol) | BDE* (kcal/mol) |
|----------|--------------------------------------------|--------------------------------|---------------------------------|----------------------------------|----------------|-----------------|
| <b>a</b> | 6.41                                       | -17.5                          | -21.6                           | -23.7                            | 88.0           | 89.8            |
| <b>b</b> | 6.38                                       | -18.8                          | -21.9                           | -24.4                            | 87.7           | 89.1            |
| <b>c</b> | 5.36                                       | -19.9                          | -23.9                           | -26.7                            | 85.7           | 86.7            |
| <b>d</b> | 4.84                                       | -22.1                          | -24.0                           | -27.6                            | 85.6           | 85.8            |
| <b>e</b> | 5.35                                       | -20.0                          | -22.7                           | -25.9                            | 86.9           | 87.5            |
| <b>f</b> | 7.51                                       | -11.9                          | -15.5                           | -17.1                            | 94.1           | 96.3            |
| <b>g</b> | 9.23                                       | -12.4                          | -15.8                           | -18.4                            | 93.8           | 95.0            |

**Table S3.** Reaction free energies for the addition of O<sub>2</sub> to TriSil-1n radicals (a-e) (refer to **Figure 1** for atom labels). Calculations were performed at the  $\omega$ b97X-D/6-311+G(2d,2p) level of theory in the solution phase (implicit SMD water solvation).

| Radical  | Reaction free energy (kcal/mol) |
|----------|---------------------------------|
| <b>a</b> | -20.5                           |
| <b>b</b> | -22.2                           |
| <b>c</b> | -27.7                           |
| <b>d</b> | -23.1                           |
| <b>e</b> | -26.0                           |

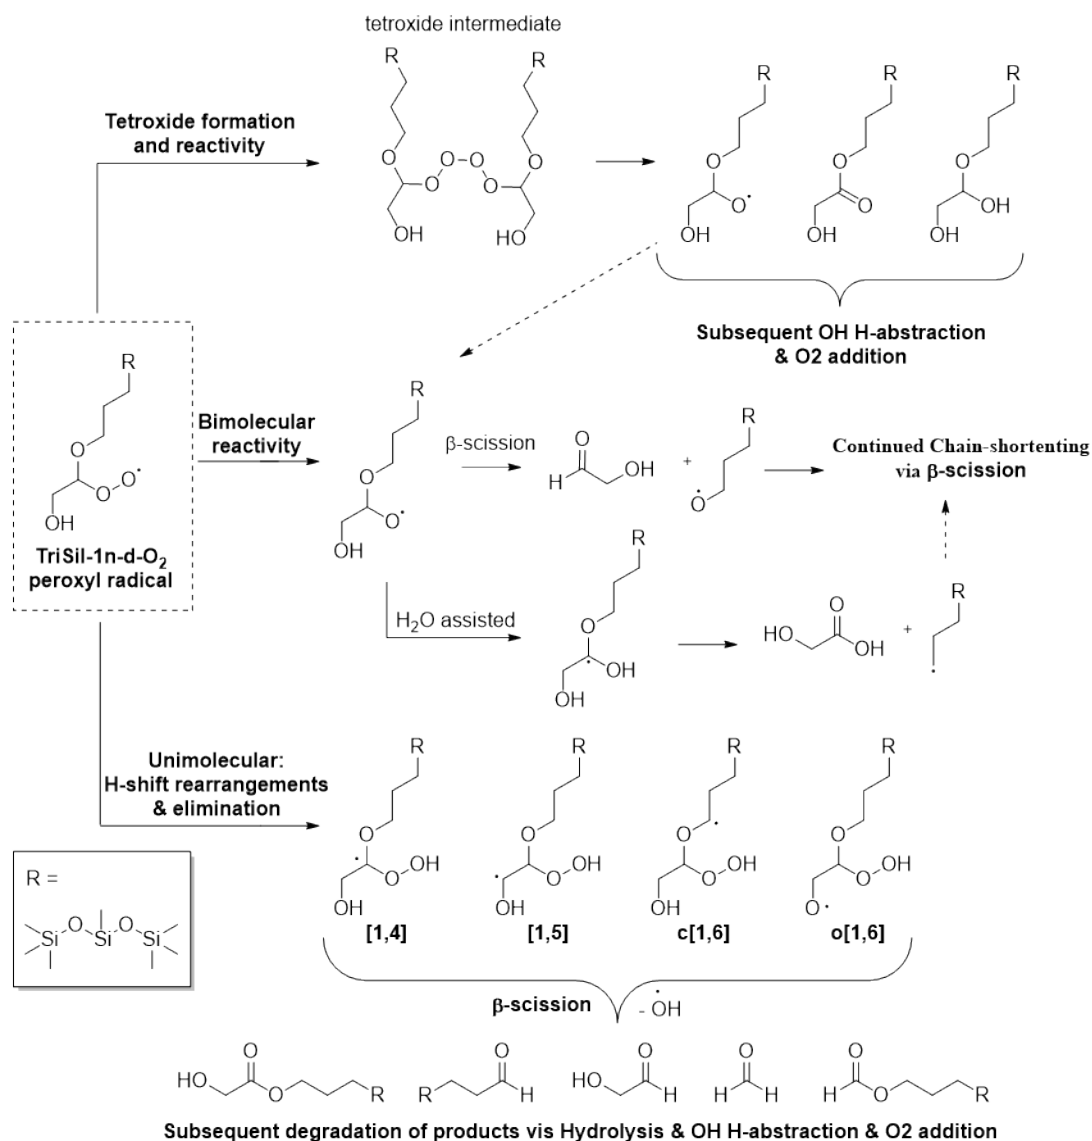

**Scheme S1.** Proposed reaction diagram for reaction channels leading to degradation of TriSil-1n-d-O<sub>2</sub> peroxy radical. Similar reactions are expected for peroxy radicals at all positions along the PEG chain (a-f).

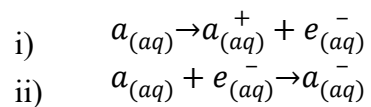

**Scheme S2.** Half reaction for the i) oxidation and ii) reduction of TriSil-1n (a).

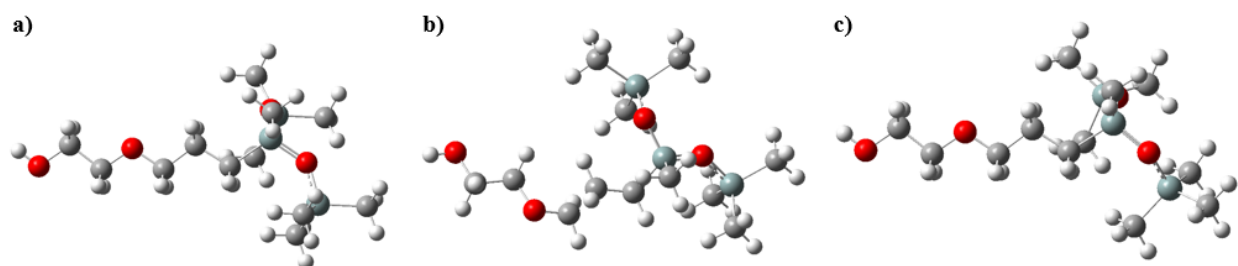

**Figure S7.** Structures of a) neutral b) oxidized and c) reduced TriSil-1n at  $\omega$ B97X-D/6-311+G(2d,2p) level of theory. Oxygen atoms are red, silicon atoms are pale blue, carbon atoms are gray, and hydrogen atoms are white.

**Table S4.** Selected bond lengths within oxidized, neutral, and reduced PEG-3n, PDMS, and TriSil-1n molecules performed at various levels of theory ( $\omega$ B97X-D, M062X, and B3LYP) with the 6-311+G(2d,2p) basis set and SMD water solvation. Refer to **Figure 1** for atom labels. The change in bond lengths between the oxidized and reduced structures compared to that of the neutral molecule is shown in parentheses, where a positive reflects an increase in bond length and a negative value reflects a decrease in bond length. Changes of 0.004 Å or less were rounded to 0 Å.

| Level of Theory                | Molecule  | Bond                            | Bond Length (Å) |         |          |
|--------------------------------|-----------|---------------------------------|-----------------|---------|----------|
|                                |           |                                 | Oxidized        | Neutral | Reduced  |
| $\omega$ B97X-D                | PEG-3n    | C <sub>a</sub> -C <sub>b</sub>  | 1.77 (+0.26)    | 1.51    | 1.51 (0) |
|                                |           | C <sub>a</sub> -O               | 1.33 (-0.09)    | 1.41    | 1.42 (0) |
|                                |           | C <sub>b</sub> -O               | 1.33 (-0.09)    | 1.41    | 1.42 (0) |
|                                | PDMS      | Si <sub>1</sub> -O <sub>1</sub> | 1.59 (-0.06)    | 1.65    | 1.65 (0) |
|                                |           | Si <sub>2</sub> -O <sub>2</sub> | 1.70 (+0.04)    | 1.66    | 1.67 (0) |
|                                |           | Si <sub>1</sub> -C <sub>a</sub> | 2.16 (+0.31)    | 1.86    | 1.86 (0) |
|                                | TriSil-1n | Si <sub>1</sub> -O <sub>1</sub> | 1.62 (-0.03)    | 1.65    | 1.65 (0) |
|                                |           | Si <sub>2</sub> -O              | 1.68 (+0.02)    | 1.66    | 1.66 (0) |
|                                |           | Si <sub>1</sub> -C <sub>a</sub> | 1.96 (+0.10)    | 1.87    | 1.87 (0) |
|                                |           | C <sub>a</sub> -C <sub>b</sub>  | 1.46 (-0.07)    | 1.53    | 1.53 (0) |
|                                |           | C <sub>b</sub> -C <sub>c</sub>  | 1.69 (+0.18)    | 1.51    | 1.51 (0) |
|                                |           | C <sub>c</sub> -O               | 1.35 (-0.07)    | 1.42    | 1.42 (0) |
|                                |           | O-C <sub>d</sub>                | 1.43 (+0.02)    | 1.41    | 1.41 (0) |
| C <sub>d</sub> -C <sub>e</sub> | 1.51 (0)  | 1.51                            | 1.51 (0)        |         |          |
| M062-X                         | PEG-3n    | C <sub>a</sub> -C <sub>b</sub>  | 1.77 (+0.26)    | 1.51    | 1.51 (0) |
|                                |           | C <sub>a</sub> -O               | 1.33 (-0.09)    | 1.42    | 1.42 (0) |
|                                |           | C <sub>b</sub> -O               | 1.33 (-0.09)    | 1.42    | 1.42 (0) |

|                                |                                |                                 |                     |                 |                 |
|--------------------------------|--------------------------------|---------------------------------|---------------------|-----------------|-----------------|
|                                | PDMS                           | Si <sub>1</sub> -O <sub>1</sub> | 1.59 <b>(-0.06)</b> | 1.65            | 1.65 <b>(0)</b> |
|                                |                                | Si <sub>2</sub> -O <sub>2</sub> | 1.71 <b>(+0.04)</b> | 1.67            | 1.66 <b>(0)</b> |
|                                |                                | Si <sub>1</sub> -C <sub>a</sub> | 2.20 <b>(+0.34)</b> | 1.86            | 1.86 <b>(0)</b> |
|                                | TriSil-1n                      | Si <sub>1</sub> -O <sub>1</sub> | 1.65 <b>(0)</b>     | 1.65            | 1.65 <b>(0)</b> |
|                                |                                | Si <sub>2</sub> -O              | 1.67 <b>(0)</b>     | 1.67            | 1.66 <b>(0)</b> |
|                                |                                | Si <sub>1</sub> -C <sub>a</sub> | 1.87 <b>(0)</b>     | 1.87            | 1.87 <b>(0)</b> |
|                                |                                | C <sub>a</sub> -C <sub>b</sub>  | 1.53 <b>(0)</b>     | 1.53            | 1.53 <b>(0)</b> |
|                                |                                | C <sub>b</sub> -C <sub>c</sub>  | 1.51 <b>(0)</b>     | 1.51            | 1.51 <b>(0)</b> |
|                                |                                | C <sub>c</sub> -O               | 1.44 <b>(+0.02)</b> | 1.42            | 1.42 <b>(0)</b> |
|                                |                                | O-C <sub>d</sub>                | 1.32 <b>(-0.09)</b> | 1.41            | 1.41 <b>(0)</b> |
| C <sub>d</sub> -C <sub>e</sub> | 1.78 <b>(+0.27)</b>            | 1.51                            | 1.51 <b>(0)</b>     |                 |                 |
| B3LYP                          | PEG-3n                         | C <sub>a</sub> -C <sub>b</sub>  | 1.73 <b>(+0.22)</b> | 1.52            | 1.51 <b>(0)</b> |
|                                |                                | C <sub>a</sub> -O               | 1.35 <b>(-0.08)</b> | 1.42            | 1.43 <b>(0)</b> |
|                                |                                | C <sub>b</sub> -O               | 1.35 <b>(-0.08)</b> | 1.42            | 1.43 <b>(0)</b> |
|                                | PDMS                           | Si <sub>1</sub> -O <sub>1</sub> | 1.60 <b>(-0.05)</b> | 1.65            | 1.65 <b>(0)</b> |
|                                |                                | Si <sub>2</sub> -O <sub>2</sub> | 1.71 <b>(+0.04)</b> | 1.67            | 1.67 <b>(0)</b> |
|                                |                                | Si <sub>1</sub> -C <sub>a</sub> | 2.10 <b>(+0.24)</b> | 1.87            | 1.87 <b>(0)</b> |
|                                | TriSil-1n                      | Si <sub>1</sub> -O <sub>1</sub> | 1.62 <b>(-0.03)</b> | 1.65            | 1.65 <b>(0)</b> |
|                                |                                | Si <sub>2</sub> -O              | 1.69 <b>(+0.02)</b> | 1.67            | 1.67 <b>(0)</b> |
|                                |                                | Si <sub>1</sub> -C <sub>a</sub> | 2.01 <b>(+0.13)</b> | 1.88            | 1.88 <b>(0)</b> |
|                                |                                | C <sub>a</sub> -C <sub>b</sub>  | 1.47 <b>(-0.06)</b> | 1.54            | 1.54 <b>(0)</b> |
|                                |                                | C <sub>b</sub> -C <sub>c</sub>  | 1.63 <b>(+0.11)</b> | 1.52            | 1.52 <b>(0)</b> |
|                                |                                | C <sub>c</sub> -O               | 1.39 <b>(-0.05)</b> | 1.43            | 1.43 <b>(0)</b> |
|                                |                                | O-C <sub>d</sub>                | 1.43 <b>(+0.01)</b> | 1.42            | 1.42 <b>(0)</b> |
|                                | C <sub>d</sub> -C <sub>e</sub> | 1.51 <b>(0)</b>                 | 1.52                | 1.52 <b>(0)</b> |                 |



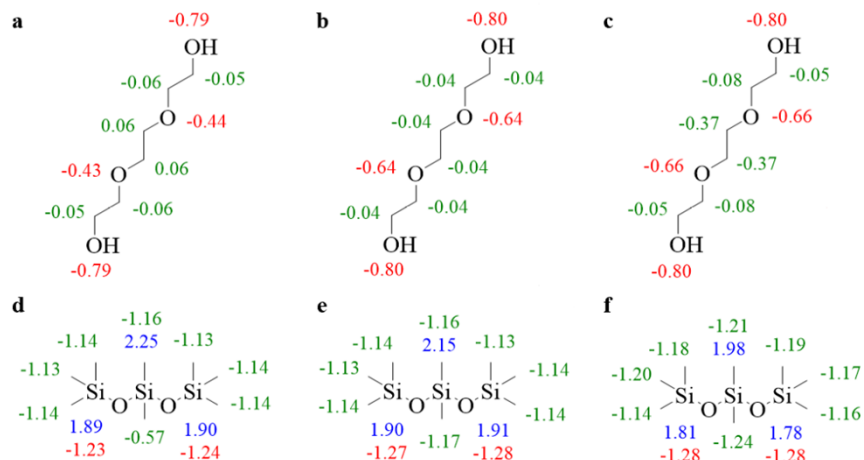

**Figure S8.** Partial atomic charges for a) oxidized b) neutral and c) reduced PEG-3n and d) oxidized e) neutral and f) reduced PDMS, where green represents carbon, red represents oxygen, and blue represents silicon. All values are presented in a.u. and were computed at the  $\omega$ b97X-D/6-311+G(2d,2p) level of theory.

**Table S5.** Reaction free energies (kcal/mol) for the oxidation of TriSil-1n, PDMS, and PEG (1n-8n). All values were computed at the  $\omega$ b97X-D/6-311+G(2d,2p) level of theory with SMD implicit water solvation. Reaction energies were calculated using a hydroxyl radical as the oxidant and hydroxide anion as a product. The \* indicates the Gibbs free energies of the methyl radical and PDMS cationic fragments (separately calculated) were substituted for the oxidized PDMS product (containing both fragments) in the calculation. Values with \*\* correspond to neutral molecules with one imaginary frequency.

| Molecule  | Reaction Energy (kcal/mol) |
|-----------|----------------------------|
| TriSil-1n | 24.6                       |
| PDMS      | 32.2/38.9*                 |
| PEG-1n    | 26.1                       |
| PEG-2n    | 24.7                       |
| PEG-3n    | 24.4                       |
| PEG-4n    | 31.5**                     |
| PEG-5n    | 22.6**                     |
| PEG-6n    | 34.4                       |
| PEG-7n    | 23.5**                     |
| PEG-8n    | 32.6                       |

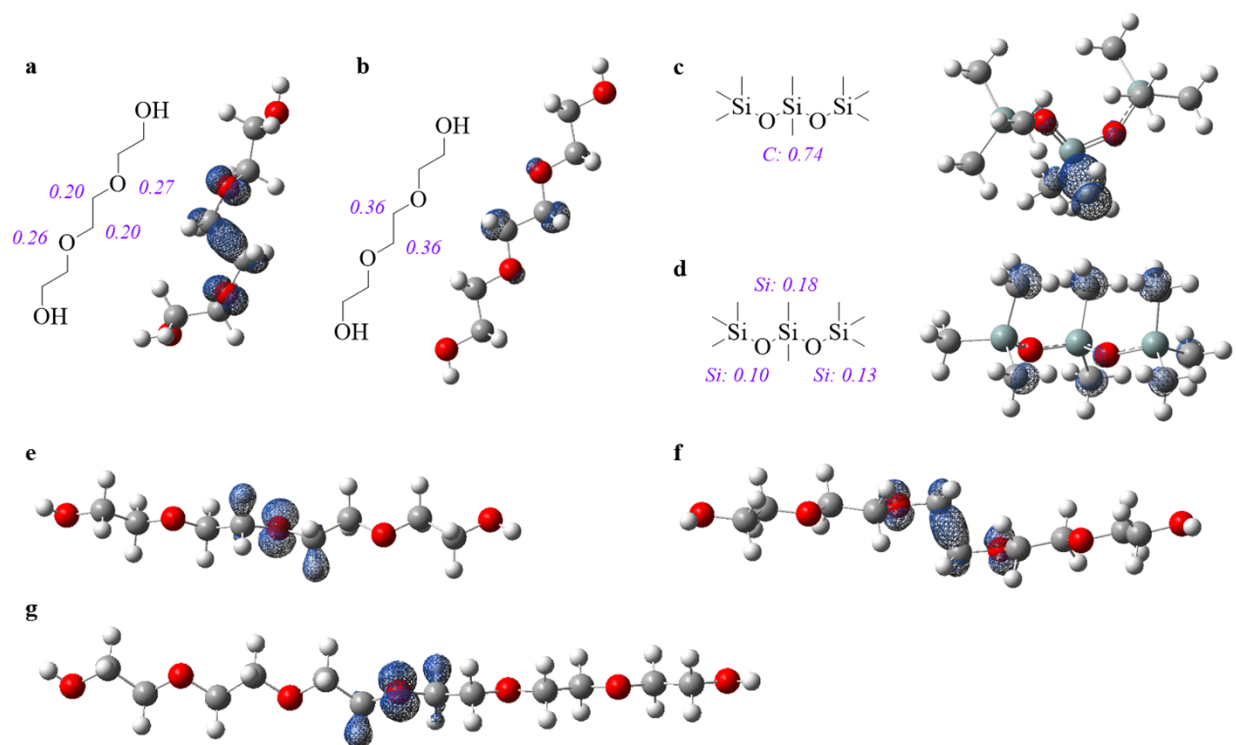

**Figure S9.** Chemical structures (left) and NBO spin density isosurfaces (right) for a) oxidized and b) reduced PEG-3n and c) oxidized and d) reduced PDMS. NBO spin density isosurfaces of oxidized e) PEG-4n f) PEG-5n and g) PEG-6n. Computations performed at the  $\omega$ b97X-D/6-311+G(2d,2p) level of theory with SMD implicit water solvation. Oxygen atoms are red, silicon atoms are pale blue, carbon atoms are gray, and hydrogen atoms are white. The isovalue for the spin density surfaces is 0.01 a.u. for all plots except for reduced PEG-3n (isovalue = 0.003 a.u.) and reduced PDMS (isovalue = 0.001 a.u.). In the chemical structures, only spin densities greater than 0.10 a. u. are reported.

**Table S6.** Standard reduction potentials (Volts) of TriSil-1n, PDMS, and PEG-1n at different positions and reaction free energies (kcal/mol), computed at the  $\omega$ b97X-D/6-311+G(2d,2p) level of theory with SMD water solvation. Refer to **Figure 1** in-text for atomic positions for TriSil-1n and below for PDMS and PEG-1n. Standard reduction potentials were calculated using the methods provided by Van Hoomissen et al. (SHE = 4.44 V) where position 0 refers to reduced molecule (TriSil-1n, PDMS, or PEG) in which no bonds were altered before optimization.<sup>48</sup> Reaction energies of the parent molecule were calculated using a solvated electron as the reductant. Values with \* correspond to neutral molecules with one imaginary frequency. Reaction energies for PEG-1n (positions a and b) were calculated using the PEG radical and hydrogen anion as products.

| Molecule  | Position | $E_{s,com.}^o$<br>(Volts) | $E_{s,sep.}^o$<br>(Volts) | Reaction<br>Energy<br>(kcal/mol) |
|-----------|----------|---------------------------|---------------------------|----------------------------------|
| TriSil-1n | 0        | -4.30                     | -                         | 22.2                             |
|           | a        | -4.35                     | -4.13                     | 23.3                             |
|           | b        | -4.20                     | -4.07                     | 20.0                             |
|           | c        | -4.18                     | -4.02                     | 19.5                             |
|           | d        | -4.11                     | -3.98                     | 17.9                             |
|           | e        | -4.12                     | -3.92                     | 18.1                             |
|           | f        | -3.89                     | -4.38                     | 12.8                             |
|           | g        | -4.55                     | -4.30                     | 27.9                             |
| PDMS      | 0        | -4.47                     | -                         | 26.0                             |
|           | a        | -4.58                     | -4.36                     | 28.6                             |
|           | b        | -4.57                     | -4.33                     | 28.3                             |
|           | c        | -4.52                     | -4.32                     | 27.3                             |
| PEG-1n    | 0        | -4.70                     | -                         | 31.4                             |
|           | a        | -                         | -4.42                     | 24.9                             |
|           | b        | -4.23                     | -3.97                     | 14.6                             |
| PEG-2n    | 0        | -3.95                     | -                         | 14.1                             |
| PEG-3n    | 0        | -4.82                     | -                         | 34.2                             |
| PEG-4n    | 0        | -4.55*                    | -                         | 28.0*                            |
| PEG-5n    | 0        | -4.56*                    | -                         | 28.2*                            |
| PEG-6n    | 0        | -4.57                     | -                         | 28.3                             |
| PEG-7n    | 0        | -3.97*                    | -                         | 14.6*                            |
| PEG-8n    | 0        | -3.94                     | -                         | 13.8                             |

### Optimized coordinates for all species presented in the manuscript

TriSil-1n-neutral-B3LYP.log Energy: -1033243.6834284

|    |          |          |          |
|----|----------|----------|----------|
| C  | -0.51128 | -0.76511 | 0.00574  |
| H  | -0.48294 | -1.85670 | 0.08720  |
| H  | -0.39552 | -0.53842 | -1.05814 |
| O  | 2.36469  | -0.60861 | 0.16162  |
| O  | 0.98513  | 1.56237  | 0.85484  |
| Si | 3.09664  | -2.00285 | -0.39614 |
| Si | 1.36039  | 2.78344  | -0.22402 |
| C  | 2.92826  | -3.36446 | 0.88067  |
| H  | 1.88322  | -3.63108 | 1.04957  |
| H  | 3.44841  | -4.26406 | 0.54303  |
| H  | 3.36184  | -3.06828 | 1.83767  |
| C  | 4.89748  | -1.57525 | -0.67020 |
| H  | 5.44729  | -2.43714 | -1.05444 |
| H  | 5.00285  | -0.76262 | -1.39177 |
| H  | 5.37362  | -1.26237 | 0.26121  |
| C  | 2.29235  | -2.51891 | -2.00762 |
| H  | 1.24413  | -2.78668 | -1.86443 |
| H  | 2.33850  | -1.71561 | -2.74557 |
| H  | 2.80366  | -3.38801 | -2.42822 |
| C  | 0.49782  | 4.31911  | 0.40873  |
| H  | 0.82998  | 4.56707  | 1.41894  |
| H  | 0.71096  | 5.17673  | -0.23305 |
| H  | -0.58491 | 4.18101  | 0.43435  |
| C  | 0.74394  | 2.34202  | -1.93831 |
| H  | -0.33367 | 2.16822  | -1.94074 |
| H  | 0.95072  | 3.15901  | -2.63379 |
| H  | 1.23395  | 1.44673  | -2.32490 |
| C  | 3.21627  | 3.03641  | -0.24149 |
| H  | 3.59033  | 3.26049  | 0.75960  |
| H  | 3.73545  | 2.14786  | -0.60433 |
| H  | 3.48504  | 3.87116  | -0.89295 |
| C  | -1.86601 | -0.24272 | 0.50748  |
| H  | -1.99236 | -0.46947 | 1.56867  |
| H  | -1.90940 | 0.84376  | 0.40724  |
| C  | -3.02582 | -0.84912 | -0.26210 |
| H  | -2.93595 | -0.62479 | -1.33063 |
| H  | -3.03719 | -1.93858 | -0.14708 |

|    |          |          |          |
|----|----------|----------|----------|
| C  | -5.39171 | -0.81893 | -0.45831 |
| H  | -5.44427 | -1.90728 | -0.34802 |
| H  | -5.32144 | -0.58626 | -1.52616 |
| C  | -6.62798 | -0.17444 | 0.13475  |
| H  | -6.70175 | -0.41466 | 1.19767  |
| H  | -6.57174 | 0.91087  | 0.02526  |
| O  | -4.25665 | -0.30817 | 0.23163  |
| O  | -7.76346 | -0.69062 | -0.57505 |
| Si | 0.98604  | -0.08869 | 0.91057  |
| C  | 1.00557  | -0.57247 | 2.71077  |
| H  | 0.15368  | -0.14273 | 3.24093  |
| H  | 0.96213  | -1.65643 | 2.82892  |
| H  | 1.91649  | -0.21607 | 3.19559  |
| H  | -8.55523 | -0.28881 | -0.20231 |

TriSil-1n-neutral-M062X.log Energy: -1032943.9563920

|    |          |          |          |
|----|----------|----------|----------|
| C  | -0.30061 | -0.87296 | 0.14600  |
| H  | -0.25629 | -1.95089 | 0.33418  |
| H  | -0.17781 | -0.74113 | -0.93196 |
| O  | 2.53267  | -0.35082 | 0.20850  |
| O  | 0.91549  | 1.57740  | 1.02713  |
| Si | 3.16362  | -1.73571 | -0.47343 |
| Si | 0.94822  | 2.68421  | -0.22107 |
| C  | 2.88273  | -3.16885 | 0.68667  |
| H  | 1.81769  | -3.35047 | 0.84590  |
| H  | 3.31678  | -4.07949 | 0.26868  |
| H  | 3.34915  | -2.98625 | 1.65626  |
| C  | 4.97972  | -1.42013 | -0.72064 |
| H  | 5.46250  | -2.28541 | -1.17806 |
| H  | 5.13618  | -0.56035 | -1.37442 |
| H  | 5.47312  | -1.21919 | 0.23156  |
| C  | 2.32466  | -2.05100 | -2.10784 |
| H  | 1.27300  | -2.30825 | -1.97441 |
| H  | 2.38523  | -1.17270 | -2.75301 |
| H  | 2.81063  | -2.88146 | -2.62433 |
| C  | -0.22787 | 4.04802  | 0.24550  |
| H  | 0.07013  | 4.51324  | 1.18652  |
| H  | -0.24696 | 4.82172  | -0.52391 |
| H  | -1.24123 | 3.65981  | 0.36230  |
| C  | 0.40818  | 1.86465  | -1.80863 |

|    |          |          |          |
|----|----------|----------|----------|
| H  | -0.61225 | 1.48347  | -1.73563 |
| H  | 0.43876  | 2.59291  | -2.62202 |
| H  | 1.06891  | 1.03697  | -2.07544 |
| C  | 2.68804  | 3.32610  | -0.39376 |
| H  | 3.03077  | 3.77813  | 0.53842  |
| H  | 3.37299  | 2.51661  | -0.65231 |
| H  | 2.74461  | 4.08265  | -1.17852 |
| C  | -1.65919 | -0.31816 | 0.58556  |
| H  | -1.81129 | -0.47913 | 1.65574  |
| H  | -1.69667 | 0.76090  | 0.41475  |
| C  | -2.79275 | -0.96971 | -0.17649 |
| H  | -2.67259 | -0.79738 | -1.25230 |
| H  | -2.79779 | -2.05206 | -0.00623 |
| C  | -5.12688 | -0.97547 | -0.43964 |
| H  | -5.16356 | -2.05869 | -0.28357 |
| H  | -5.03254 | -0.78515 | -1.51390 |
| C  | -6.38691 | -0.33286 | 0.09176  |
| H  | -6.47983 | -0.53258 | 1.16118  |
| H  | -6.34206 | 0.74756  | -0.06057 |
| O  | -4.02860 | -0.41724 | 0.25459  |
| O  | -7.47960 | -0.89817 | -0.62374 |
| Si | 1.12897  | -0.05546 | 1.02303  |
| C  | 1.26330  | -0.60687 | 2.78654  |
| H  | 0.37373  | -0.31589 | 3.34772  |
| H  | 1.36277  | -1.69153 | 2.84768  |
| H  | 2.13210  | -0.15492 | 3.26756  |
| H  | -8.29360 | -0.51965 | -0.27929 |

TriSil-1n-neutral-wB97XD.log      Energy: -1033051.4127575

|    |          |          |          |
|----|----------|----------|----------|
| C  | -0.38061 | -0.82014 | 0.17989  |
| H  | -0.36710 | -1.90319 | 0.33991  |
| H  | -0.23472 | -0.66574 | -0.89186 |
| O  | 2.48376  | -0.51994 | 0.39005  |
| O  | 0.98301  | 1.56721  | 1.02537  |
| Si | 3.02987  | -1.83060 | -0.47777 |
| Si | 1.21680  | 2.63334  | -0.23685 |
| C  | 2.52291  | -3.39434 | 0.40345  |
| H  | 1.43592  | -3.47748 | 0.46804  |
| H  | 2.89418  | -4.27245 | -0.12987 |
| H  | 2.92791  | -3.41943 | 1.41715  |

|    |          |          |          |
|----|----------|----------|----------|
| C  | 4.88299  | -1.67231 | -0.54776 |
| H  | 5.31982  | -2.49828 | -1.11330 |
| H  | 5.17385  | -0.73920 | -1.03485 |
| H  | 5.31559  | -1.68241 | 0.45456  |
| C  | 2.31036  | -1.77884 | -2.19680 |
| H  | 1.22679  | -1.90627 | -2.18370 |
| H  | 2.53825  | -0.82912 | -2.68510 |
| H  | 2.73547  | -2.58005 | -2.80623 |
| C  | 0.33332  | 4.20225  | 0.23532  |
| H  | 0.72576  | 4.60671  | 1.17053  |
| H  | 0.45711  | 4.96229  | -0.53917 |
| H  | -0.73594 | 4.02248  | 0.36435  |
| C  | 0.50411  | 1.92525  | -1.80967 |
| H  | -0.55585 | 1.68919  | -1.69642 |
| H  | 0.60316  | 2.65310  | -2.61866 |
| H  | 1.02874  | 1.01674  | -2.11259 |
| C  | 3.04511  | 2.92940  | -0.44473 |
| H  | 3.49111  | 3.30065  | 0.48012  |
| H  | 3.55759  | 2.00667  | -0.72359 |
| H  | 3.22772  | 3.66856  | -1.22811 |
| C  | -1.73430 | -0.24538 | 0.60396  |
| H  | -1.90427 | -0.41306 | 1.67042  |
| H  | -1.74916 | 0.83521  | 0.44295  |
| C  | -2.86886 | -0.87007 | -0.17881 |
| H  | -2.72929 | -0.69393 | -1.25224 |
| H  | -2.89335 | -1.95434 | -0.01745 |
| C  | -5.20276 | -0.83216 | -0.46748 |
| H  | -5.26021 | -1.91685 | -0.32232 |
| H  | -5.09737 | -0.63577 | -1.54050 |
| C  | -6.45646 | -0.17209 | 0.06031  |
| H  | -6.56036 | -0.37749 | 1.12863  |
| H  | -6.39262 | 0.90975  | -0.08184 |
| O  | -4.10032 | -0.30050 | 0.23861  |
| O  | -7.55797 | -0.70909 | -0.66321 |
| Si | 1.06432  | -0.07622 | 1.09709  |
| C  | 1.06918  | -0.57354 | 2.88189  |
| H  | 0.15206  | -0.25625 | 3.38168  |
| H  | 1.14318  | -1.65996 | 2.96694  |
| H  | 1.91631  | -0.13207 | 3.40987  |
| H  | -8.36201 | -0.31870 | -0.31602 |

TriSil-1n-oxidized-B3LYP.log

Energy: -1033094.9447460

|    |          |          |          |
|----|----------|----------|----------|
| C  | -0.46544 | -1.22827 | -0.25671 |
| H  | -0.03178 | -2.22737 | -0.23444 |
| H  | -0.34825 | -0.76122 | -1.23442 |
| O  | 2.24625  | -0.38299 | 0.00177  |
| O  | 0.37605  | 1.36255  | 0.77899  |
| Si | 3.53545  | -1.41538 | -0.35655 |
| Si | 0.64410  | 2.77223  | -0.12069 |
| C  | 3.95077  | -2.41823 | 1.16408  |
| H  | 3.12779  | -3.07478 | 1.45094  |
| H  | 4.82355  | -3.04543 | 0.96815  |
| H  | 4.18653  | -1.77402 | 2.01285  |
| C  | 4.94366  | -0.29247 | -0.84663 |
| H  | 5.82348  | -0.88011 | -1.11763 |
| H  | 4.67397  | 0.32396  | -1.70586 |
| H  | 5.22282  | 0.36991  | -0.02542 |
| C  | 2.99890  | -2.50863 | -1.77301 |
| H  | 2.15625  | -3.14182 | -1.49022 |
| H  | 2.70363  | -1.91444 | -2.63953 |
| H  | 3.81992  | -3.16146 | -2.07801 |
| C  | -0.54695 | 4.03079  | 0.57213  |
| H  | -0.35917 | 4.20727  | 1.63284  |
| H  | -0.44299 | 4.98439  | 0.05020  |
| H  | -1.58047 | 3.69801  | 0.46055  |
| C  | 0.28318  | 2.40127  | -1.91732 |
| H  | -0.74105 | 2.04902  | -2.05112 |
| H  | 0.40638  | 3.30502  | -2.51851 |
| H  | 0.96107  | 1.64338  | -2.31331 |
| C  | 2.42011  | 3.29662  | 0.12705  |
| H  | 2.63824  | 3.45428  | 1.18495  |
| H  | 3.11511  | 2.54788  | -0.25620 |
| H  | 2.61388  | 4.23477  | -0.39790 |
| C  | -1.80706 | -1.11150 | 0.33958  |
| H  | -1.89639 | -1.59229 | 1.30957  |
| H  | -2.17741 | -0.08948 | 0.37981  |
| C  | -2.85765 | -1.89555 | -0.63406 |
| H  | -2.80067 | -1.44826 | -1.62377 |
| H  | -2.56629 | -2.94107 | -0.63118 |
| C  | -4.88558 | -0.63988 | -0.44713 |



|    |          |          |          |
|----|----------|----------|----------|
| H  | -4.91094 | -0.55434 | -1.53499 |
| H  | -4.40534 | 0.25120  | -0.03389 |
| C  | -6.27645 | -0.80442 | 0.13008  |
| H  | -6.75636 | -1.68738 | -0.29591 |
| H  | -6.21773 | -0.92330 | 1.21393  |
| O  | -4.12657 | -1.79962 | -0.08425 |
| O  | -7.00180 | 0.38116  | -0.21279 |
| Si | 0.86735  | -0.17968 | 0.82220  |
| C  | 0.85718  | -0.85476 | 2.54868  |
| H  | -0.09378 | -0.62625 | 3.02895  |
| H  | 1.00801  | -1.93318 | 2.54677  |
| H  | 1.66240  | -0.38467 | 3.11600  |
| H  | -7.91057 | 0.27277  | 0.08716  |

TriSil-1n-oxidized-M062X.log      Energy: -1032788.2724975

|    |          |          |          |
|----|----------|----------|----------|
| C  | -0.46288 | -0.69598 | 0.26845  |
| H  | -0.52243 | -1.76883 | 0.47908  |
| H  | -0.39768 | -0.59342 | -0.81753 |
| O  | 2.40432  | -0.51335 | 0.15727  |
| O  | 1.07776  | 1.62161  | 0.98472  |
| Si | 2.83527  | -1.98789 | -0.49300 |
| Si | 1.25249  | 2.65991  | -0.31145 |
| C  | 2.47751  | -3.32646 | 0.75504  |
| H  | 1.41157  | -3.37672 | 0.98751  |
| H  | 2.77910  | -4.29907 | 0.36104  |
| H  | 3.02389  | -3.15335 | 1.68373  |
| C  | 4.65309  | -1.88429 | -0.86987 |
| H  | 5.00931  | -2.81578 | -1.31291 |
| H  | 4.85468  | -1.07526 | -1.57414 |
| H  | 5.22860  | -1.69757 | 0.03809  |
| C  | 1.85464  | -2.27642 | -2.05140 |
| H  | 0.79246  | -2.40144 | -1.83643 |
| H  | 1.97033  | -1.44205 | -2.74543 |
| H  | 2.20499  | -3.18143 | -2.55222 |
| C  | 0.36175  | 4.22742  | 0.14646  |
| H  | 0.78375  | 4.66386  | 1.05323  |
| H  | 0.44193  | 4.96537  | -0.65352 |
| H  | -0.69730 | 4.03139  | 0.32303  |
| C  | 0.49274  | 1.89083  | -1.83271 |
| H  | -0.56781 | 1.67869  | -1.68297 |

|    |          |          |          |
|----|----------|----------|----------|
| H  | 0.58322  | 2.57971  | -2.67533 |
| H  | 0.99697  | 0.96107  | -2.10468 |
| C  | 3.06751  | 2.97371  | -0.58525 |
| H  | 3.53145  | 3.38125  | 0.31447  |
| H  | 3.58469  | 2.04929  | -0.84766 |
| H  | 3.21622  | 3.68869  | -1.39656 |
| C  | -1.72008 | 0.00976  | 0.78351  |
| H  | -1.81795 | -0.10907 | 1.86416  |
| H  | -1.66989 | 1.07950  | 0.57120  |
| C  | -2.94909 | -0.56242 | 0.11466  |
| H  | -2.91270 | -0.40735 | -0.96681 |
| H  | -3.08506 | -1.62137 | 0.33171  |
| C  | -5.25465 | -0.50045 | 0.65475  |
| H  | -6.00917 | 0.05038  | 1.20670  |
| H  | -5.18429 | -1.57338 | 0.82007  |
| C  | -5.95760 | -0.47609 | -0.98533 |
| H  | -6.01577 | 0.59120  | -1.17342 |
| H  | -5.20258 | -1.03942 | -1.52523 |
| O  | -4.11042 | 0.15671  | 0.58495  |
| O  | -7.11876 | -1.12958 | -0.92131 |
| Si | 1.10105  | -0.02321 | 1.03798  |
| C  | 1.26334  | -0.52989 | 2.81160  |
| H  | 0.45233  | -0.10631 | 3.40642  |
| H  | 1.22652  | -1.61548 | 2.91184  |
| H  | 2.20898  | -0.17863 | 3.22733  |
| H  | -7.84270 | -0.52920 | -0.68876 |

TriSil-1n-oxidized-wB97XD.log      Energy: -1032896.8999777

|    |          |          |          |
|----|----------|----------|----------|
| C  | -0.06720 | -1.30654 | 0.03995  |
| H  | 0.38781  | -2.28399 | 0.20290  |
| H  | 0.07240  | -0.96873 | -0.98635 |
| O  | 2.44603  | 0.02036  | 0.22880  |
| O  | 0.33215  | 1.37673  | 1.08106  |
| Si | 3.51525  | -1.03830 | -0.51679 |
| Si | 0.05939  | 2.54815  | -0.09579 |
| C  | 3.63549  | -2.57768 | 0.52319  |
| H  | 2.66703  | -3.07515 | 0.61026  |
| H  | 4.33454  | -3.28520 | 0.07177  |
| H  | 3.99270  | -2.34478 | 1.52805  |
| C  | 5.13719  | -0.13922 | -0.61321 |

|    |          |          |          |
|----|----------|----------|----------|
| H  | 5.88956  | -0.75913 | -1.10542 |
| H  | 5.03498  | 0.78562  | -1.18418 |
| H  | 5.50464  | 0.11245  | 0.38334  |
| C  | 2.84359  | -1.41625 | -2.21029 |
| H  | 1.90635  | -1.97223 | -2.15213 |
| H  | 2.66357  | -0.49672 | -2.77067 |
| H  | 3.55757  | -2.02052 | -2.77466 |
| C  | -1.38462 | 3.54513  | 0.51372  |
| H  | -1.16778 | 3.99816  | 1.48293  |
| H  | -1.62065 | 4.34692  | -0.18911 |
| H  | -2.27102 | 2.91648  | 0.62005  |
| C  | -0.34507 | 1.69907  | -1.70502 |
| H  | -1.20561 | 1.03448  | -1.59925 |
| H  | -0.59045 | 2.44718  | -2.46236 |
| H  | 0.50058  | 1.11577  | -2.07587 |
| C  | 1.60044  | 3.57548  | -0.25623 |
| H  | 1.86223  | 4.04150  | 0.69554  |
| H  | 2.44275  | 2.96118  | -0.57970 |
| H  | 1.45637  | 4.36873  | -0.99309 |
| C  | -1.43161 | -1.17551 | 0.53953  |
| H  | -1.60756 | -1.59461 | 1.52560  |
| H  | -1.86739 | -0.18449 | 0.43084  |
| C  | -2.42213 | -2.09222 | -0.48551 |
| H  | -2.26072 | -1.68069 | -1.47985 |
| H  | -2.07478 | -3.11034 | -0.34332 |
| C  | -4.43160 | -0.84746 | -0.50847 |
| H  | -4.41119 | -0.84852 | -1.59923 |
| H  | -3.96714 | 0.07161  | -0.14108 |
| C  | -5.83781 | -0.98577 | 0.02725  |
| H  | -6.28397 | -1.91187 | -0.34140 |
| H  | -5.81352 | -1.01635 | 1.11895  |
| O  | -3.68353 | -1.96689 | -0.02926 |
| O  | -6.55847 | 0.14539  | -0.43574 |
| Si | 1.06066  | -0.07133 | 1.06572  |
| C  | 1.25042  | -0.74585 | 2.76797  |
| H  | 0.28530  | -0.76709 | 3.27572  |
| H  | 1.64992  | -1.75983 | 2.73148  |
| H  | 1.93535  | -0.12155 | 3.34425  |
| H  | -7.46816 | 0.05867  | -0.14424 |

TriSil-1n-reduced-B3LYP.log

Energy: -1033255.7251845

|    |          |          |          |
|----|----------|----------|----------|
| C  | -0.53370 | -0.76612 | -0.14521 |
| H  | -0.47245 | -1.85953 | -0.15413 |
| H  | -0.45965 | -0.45549 | -1.19220 |
| O  | 2.32113  | -0.60834 | -0.11941 |
| O  | 0.97679  | 1.51770  | 0.79484  |
| Si | 3.33142  | -1.91983 | -0.35413 |
| Si | 1.13888  | 2.86909  | -0.17439 |
| C  | 4.39545  | -2.17361 | 1.16940  |
| H  | 3.79620  | -2.45360 | 2.03975  |
| H  | 5.12326  | -2.97198 | 0.99204  |
| H  | 4.95100  | -1.26443 | 1.41603  |
| C  | 4.40054  | -1.51401 | -1.83659 |
| H  | 5.09833  | -2.33288 | -2.04569 |
| H  | 3.79156  | -1.35146 | -2.73134 |
| H  | 4.98802  | -0.60681 | -1.66145 |
| C  | 2.31205  | -3.46069 | -0.68167 |
| H  | 1.67731  | -3.71375 | 0.17190  |
| H  | 1.67250  | -3.33738 | -1.55912 |
| H  | 2.97374  | -4.31220 | -0.86818 |
| C  | 0.16504  | 4.22866  | 0.66968  |
| H  | 0.53995  | 4.40794  | 1.68008  |
| H  | 0.24214  | 5.16557  | 0.11277  |
| H  | -0.89335 | 3.96808  | 0.74332  |
| C  | 0.44883  | 2.54077  | -1.88726 |
| H  | -0.60554 | 2.25673  | -1.84876 |
| H  | 0.52977  | 3.44273  | -2.50042 |
| H  | 0.99854  | 1.74598  | -2.39727 |
| C  | 2.95066  | 3.33698  | -0.27873 |
| H  | 3.37560  | 3.49143  | 0.71697  |
| H  | 3.53785  | 2.55894  | -0.77438 |
| H  | 3.07724  | 4.26341  | -0.84715 |
| C  | -1.88380 | -0.32569 | 0.43900  |
| H  | -1.97017 | -0.64584 | 1.47998  |
| H  | -1.95979 | 0.76377  | 0.43504  |
| C  | -3.05044 | -0.89882 | -0.34589 |
| H  | -3.00685 | -0.57163 | -1.39042 |
| H  | -3.02105 | -1.99392 | -0.33595 |
| C  | -5.42061 | -0.93103 | -0.46970 |
| H  | -5.43316 | -2.02621 | -0.47291 |

|    |          |          |          |
|----|----------|----------|----------|
| H  | -5.39264 | -0.58641 | -1.50876 |
| C  | -6.65845 | -0.39744 | 0.22199  |
| H  | -6.68889 | -0.74600 | 1.25672  |
| H  | -6.64420 | 0.69461  | 0.22173  |
| O  | -4.28139 | -0.45353 | 0.23718  |
| O  | -7.79769 | -0.88275 | -0.50368 |
| Si | 0.99327  | -0.13281 | 0.74269  |
| C  | 1.08006  | -0.72241 | 2.51135  |
| H  | 0.23411  | -0.33802 | 3.08660  |
| H  | 1.05764  | -1.81285 | 2.56999  |
| H  | 1.99749  | -0.37586 | 2.99161  |
| H  | -8.58910 | -0.51736 | -0.09459 |

TriSil-1n-reduced-M062X.log      Energy: -1032955.3596007

|    |          |          |          |
|----|----------|----------|----------|
| C  | -0.29755 | -0.84955 | -0.15336 |
| H  | -0.15436 | -1.93491 | -0.15030 |
| H  | -0.27608 | -0.54243 | -1.20372 |
| O  | 2.52334  | -0.32800 | -0.17265 |
| O  | 0.91179  | 1.55330  | 0.84404  |
| Si | 3.56978  | -1.60680 | -0.37162 |
| Si | 0.52670  | 2.83062  | -0.15294 |
| C  | 4.63420  | -1.80065 | 1.14949  |
| H  | 4.03318  | -2.03767 | 2.02934  |
| H  | 5.35428  | -2.61039 | 1.00182  |
| H  | 5.19035  | -0.88285 | 1.35298  |
| C  | 4.63707  | -1.25800 | -1.85778 |
| H  | 5.33614  | -2.08358 | -2.02417 |
| H  | 4.02584  | -1.13267 | -2.75491 |
| H  | 5.21070  | -0.33875 | -1.71593 |
| C  | 2.58361  | -3.17099 | -0.63667 |
| H  | 1.95836  | -3.39825 | 0.22989  |
| H  | 1.93593  | -3.08221 | -1.51171 |
| H  | 3.25691  | -4.01711 | -0.79636 |
| C  | -0.60252 | 3.92777  | 0.84513  |
| H  | -0.10822 | 4.26292  | 1.75882  |
| H  | -0.89136 | 4.81081  | 0.27213  |
| H  | -1.51169 | 3.39297  | 1.12687  |
| C  | -0.35522 | 2.26415  | -1.69873 |
| H  | -1.27228 | 1.71626  | -1.47200 |
| H  | -0.62499 | 3.14428  | -2.28910 |

|    |          |          |          |
|----|----------|----------|----------|
| H  | 0.28667  | 1.63147  | -2.31635 |
| C  | 2.07712  | 3.76161  | -0.60928 |
| H  | 2.65184  | 4.02099  | 0.28383  |
| H  | 2.72093  | 3.15966  | -1.25514 |
| H  | 1.82174  | 4.68591  | -1.13591 |
| C  | -1.64945 | -0.49820 | 0.47498  |
| H  | -1.71113 | -0.89597 | 1.49056  |
| H  | -1.76702 | 0.58626  | 0.54867  |
| C  | -2.79345 | -1.05541 | -0.34404 |
| H  | -2.76599 | -0.64346 | -1.35948 |
| H  | -2.71458 | -2.14558 | -0.42087 |
| C  | -5.13425 | -1.19320 | -0.46938 |
| H  | -5.09222 | -2.28459 | -0.54902 |
| H  | -5.12477 | -0.77385 | -1.48090 |
| C  | -6.39398 | -0.77425 | 0.25198  |
| H  | -6.40092 | -1.19652 | 1.25896  |
| H  | -6.43013 | 0.31442  | 0.32818  |
| O  | -4.02851 | -0.71287 | 0.26987  |
| O  | -7.49325 | -1.26354 | -0.50818 |
| Si | 1.15827  | -0.06905 | 0.71291  |
| C  | 1.34986  | -0.73278 | 2.43656  |
| H  | 0.45969  | -0.51325 | 3.03014  |
| H  | 1.49264  | -1.81554 | 2.42604  |
| H  | 2.21083  | -0.27883 | 2.93142  |
| H  | -8.30640 | -0.99856 | -0.06884 |

H2O.log Energy: -47971.9724678

|   |          |          |          |
|---|----------|----------|----------|
| O | -0.00000 | 0.00000  | 0.11743  |
| H | 0.00000  | -0.75902 | -0.46970 |
| H | 0.00000  | 0.75902  | -0.46970 |

Pl1a-H+\_Fig\_S5.log Energy: -776833.3282783

|    |          |          |          |
|----|----------|----------|----------|
| C  | 0.03758  | -0.04764 | -0.00550 |
| H  | -0.09743 | -0.75079 | -0.83322 |
| H  | -0.09044 | -0.62569 | 0.91425  |
| O  | -2.80710 | 0.59065  | -0.05351 |
| O  | -1.26701 | 2.06405  | 1.49496  |
| Si | -3.54883 | -0.92571 | -0.03767 |
| C  | -3.08993 | -1.79061 | -1.61788 |
| H  | -2.01105 | -1.94706 | -1.67994 |

|    |          |          |          |
|----|----------|----------|----------|
| H  | -3.57484 | -2.76778 | -1.67193 |
| H  | -3.40308 | -1.20920 | -2.48704 |
| C  | -5.36948 | -0.58339 | 0.06685  |
| H  | -5.93232 | -1.51923 | 0.06784  |
| H  | -5.61352 | -0.04127 | 0.98232  |
| H  | -5.70453 | 0.01189  | -0.78448 |
| C  | -2.93492 | -1.85756 | 1.44956  |
| H  | -1.87224 | -2.08996 | 1.36254  |
| H  | -3.08861 | -1.28218 | 2.36450  |
| H  | -3.47677 | -2.80083 | 1.54965  |
| C  | 1.43561  | 0.57739  | -0.06078 |
| H  | 1.56568  | 1.12792  | -0.99456 |
| H  | 1.56730  | 1.29078  | 0.75631  |
| C  | 2.51079  | -0.48400 | 0.03578  |
| H  | 2.42489  | -1.02939 | 0.98280  |
| H  | 2.40317  | -1.20809 | -0.78029 |
| C  | 4.84263  | -0.79129 | 0.03761  |
| H  | 4.76958  | -1.52254 | -0.77515 |
| H  | 4.80195  | -1.33202 | 0.98975  |
| C  | 6.14068  | -0.02346 | -0.06907 |
| H  | 6.17861  | 0.50718  | -1.02373 |
| H  | 6.20310  | 0.70958  | 0.73926  |
| O  | 3.78170  | 0.13931  | -0.04384 |
| O  | 7.20348  | -0.96467 | 0.02462  |
| Si | -1.31887 | 1.19674  | -0.09871 |
| C  | -1.09864 | 2.59852  | -1.25588 |
| H  | -0.17921 | 3.14260  | -1.03412 |
| H  | -1.02961 | 2.22158  | -2.27792 |
| H  | -1.94076 | 3.28837  | -1.19668 |
| H  | 8.03156  | -0.48714 | -0.05189 |
| H  | -0.60139 | 2.75605  | 1.62108  |
| H  | -1.31678 | 1.54044  | 2.30795  |

Pl1a-H+\_Fig\_S6.log Energy: -776833.3308009

|    |          |          |          |
|----|----------|----------|----------|
| C  | -0.04695 | 0.14099  | -0.38627 |
| H  | 0.16060  | -0.73455 | 0.23605  |
| H  | -0.00457 | -0.19736 | -1.42516 |
| O  | 2.79980  | 0.49823  | -0.47393 |
| O  | 1.28420  | 2.49058  | -1.31607 |
| Si | 3.43284  | -1.09521 | 0.07904  |

|    |          |          |          |
|----|----------|----------|----------|
| C  | 2.90738  | -1.18475 | 1.84409  |
| H  | 1.82257  | -1.19245 | 1.95577  |
| H  | 3.28690  | -2.12023 | 2.26263  |
| H  | 3.32172  | -0.36117 | 2.42588  |
| C  | 5.24507  | -0.89406 | -0.19284 |
| H  | 5.75983  | -1.82166 | 0.06566  |
| H  | 5.45949  | -0.67193 | -1.23973 |
| H  | 5.64899  | -0.09333 | 0.42751  |
| C  | 2.62688  | -2.33292 | -1.02614 |
| H  | 1.54766  | -2.36161 | -0.87422 |
| H  | 2.82906  | -2.10585 | -2.07386 |
| H  | 3.02668  | -3.32655 | -0.81135 |
| C  | -1.43641 | 0.69651  | -0.05140 |
| H  | -1.47203 | 1.02631  | 0.98934  |
| H  | -1.65993 | 1.56440  | -0.67504 |
| C  | -2.50414 | -0.35461 | -0.26992 |
| H  | -2.50095 | -0.68806 | -1.31419 |
| H  | -2.31068 | -1.22877 | 0.36282  |
| C  | -4.81931 | -0.73461 | -0.12346 |
| H  | -4.65892 | -1.61119 | 0.51416  |
| H  | -4.85871 | -1.07140 | -1.16538 |
| C  | -6.11467 | -0.05049 | 0.25069  |
| H  | -6.06805 | 0.28547  | 1.28967  |
| H  | -6.27093 | 0.82081  | -0.39025 |
| O  | -3.77018 | 0.19675  | 0.05132  |
| O  | -7.16307 | -0.99640 | 0.07576  |
| Si | 1.29458  | 1.37233  | -0.12224 |
| C  | 1.47720  | 2.07409  | 1.56313  |
| H  | 0.64696  | 2.75393  | 1.76358  |
| H  | 1.46100  | 1.28796  | 2.31823  |
| H  | 2.41015  | 2.63131  | 1.65602  |
| H  | -7.99151 | -0.56805 | 0.29888  |
| H  | 1.70916  | 3.33327  | -1.13915 |
| H  | 3.30548  | 0.89663  | -1.19690 |

Pla.log      Energy: -776570.5353135

|   |          |          |          |
|---|----------|----------|----------|
| C | 0.03774  | -0.01278 | 0.22558  |
| H | -0.14661 | -0.77053 | -0.54309 |
| H | -0.01215 | -0.53011 | 1.18854  |
| O | -2.78505 | 0.53007  | 0.50071  |



|    |          |          |          |
|----|----------|----------|----------|
| O  | -1.17913 | 2.34133  | 1.39578  |
| Si | -3.52145 | -0.87443 | -0.02022 |
| C  | -3.28668 | -1.03389 | -1.86356 |
| H  | -2.22936 | -1.12497 | -2.12201 |
| H  | -3.79780 | -1.92580 | -2.23338 |
| H  | -3.69396 | -0.16828 | -2.38954 |
| C  | -5.32254 | -0.71814 | 0.41653  |
| H  | -5.86844 | -1.61526 | 0.11655  |
| H  | -5.45360 | -0.58805 | 1.49261  |
| H  | -5.77515 | 0.13759  | -0.08819 |
| C  | -2.74453 | -2.32363 | 0.85669  |
| H  | -1.69577 | -2.43744 | 0.57639  |
| H  | -2.79725 | -2.20070 | 1.94024  |
| H  | -3.26485 | -3.24841 | 0.59659  |
| C  | 1.42718  | 0.60021  | 0.02689  |
| H  | 1.49260  | 1.07999  | -0.95261 |
| H  | 1.61136  | 1.37471  | 0.77620  |
| C  | 2.51554  | -0.44648 | 0.13365  |
| H  | 2.48489  | -0.92622 | 1.11905  |
| H  | 2.36975  | -1.22615 | -0.62345 |
| C  | 4.84635  | -0.75342 | 0.05464  |
| H  | 4.74275  | -1.54603 | -0.69500 |
| H  | 4.84543  | -1.21862 | 1.04685  |
| C  | 6.13821  | 0.00157  | -0.16240 |
| H  | 6.13790  | 0.45731  | -1.15578 |
| H  | 6.23210  | 0.79417  | 0.58427  |
| O  | 3.78076  | 0.16834  | -0.05533 |
| O  | 7.20496  | -0.93205 | -0.03905 |
| Si | -1.34305 | 1.23677  | 0.16098  |
| C  | -1.39382 | 2.10203  | -1.47975 |
| H  | -0.49776 | 2.70922  | -1.62487 |
| H  | -1.44468 | 1.37769  | -2.29499 |
| H  | -2.26319 | 2.75819  | -1.54886 |
| H  | 8.02994  | -0.46049 | -0.16793 |
| H  | -0.38012 | 2.87108  | 1.36525  |

P2a-H+.log Energy: -520353.1604327

|   |          |          |          |
|---|----------|----------|----------|
| C | -1.24285 | -0.73582 | -0.21269 |
| H | -1.22440 | -1.07378 | -1.25337 |
| H | -1.22722 | -1.63495 | 0.40951  |

|    |          |          |          |
|----|----------|----------|----------|
| O  | -4.12056 | -1.09480 | -0.34732 |
| O  | -3.11518 | 0.32170  | 1.65195  |
| C  | -0.02149 | 0.14418  | 0.08143  |
| H  | -0.04665 | 1.04949  | -0.52903 |
| H  | -0.02375 | 0.45676  | 1.12734  |
| C  | 1.26202  | -0.60620 | -0.20549 |
| H  | 1.31168  | -1.51867 | 0.40016  |
| H  | 1.30146  | -0.90039 | -1.26082 |
| C  | 3.60230  | -0.40282 | -0.16594 |
| H  | 3.67644  | -0.66104 | -1.22824 |
| H  | 3.68982  | -1.32587 | 0.41794  |
| C  | 4.70716  | 0.55742  | 0.21247  |
| H  | 4.60935  | 1.47966  | -0.36582 |
| H  | 4.63612  | 0.80329  | 1.27498  |
| O  | 2.36578  | 0.22903  | 0.09917  |
| O  | 5.94441  | -0.08490 | -0.07268 |
| Si | -2.84176 | 0.12609  | 0.05871  |
| C  | -3.27940 | 1.53422  | -1.02381 |
| H  | -2.54657 | 2.33359  | -0.90184 |
| H  | -3.27471 | 1.22521  | -2.07046 |
| H  | -4.26689 | 1.92511  | -0.77657 |
| H  | 6.65341  | 0.51592  | 0.16314  |
| H  | -3.80744 | 0.93027  | 1.92196  |
| H  | -4.30357 | -1.78218 | 0.31101  |
| H  | -4.13454 | -1.50184 | -1.22658 |

P2a.log      Energy: -520091.8618257

|   |          |          |          |
|---|----------|----------|----------|
| C | -1.30400 | -0.80522 | -0.23913 |
| H | -1.26264 | -1.13767 | -1.28101 |
| H | -1.27110 | -1.71293 | 0.37215  |
| O | -4.18424 | -0.99993 | -0.44829 |
| O | -3.03970 | 0.31469  | 1.65378  |
| C | -0.09605 | 0.08325  | 0.07161  |
| H | -0.12612 | 0.98945  | -0.53817 |
| H | -0.11574 | 0.39868  | 1.11692  |
| C | 1.20454  | -0.64312 | -0.19776 |
| H | 1.27031  | -1.54730 | 0.41910  |
| H | 1.25687  | -0.95051 | -1.24899 |
| C | 3.54204  | -0.40279 | -0.14969 |
| H | 3.61909  | -0.69038 | -1.20433 |

|    |          |          |          |
|----|----------|----------|----------|
| H  | 3.64697  | -1.30742 | 0.45988  |
| C  | 4.63213  | 0.58576  | 0.19761  |
| H  | 4.51984  | 1.48797  | -0.40898 |
| H  | 4.55832  | 0.86349  | 1.25204  |
| O  | 2.29545  | 0.21443  | 0.09983  |
| O  | 5.87912  | -0.04612 | -0.06906 |
| Si | -2.95142 | 0.01390  | 0.01976  |
| C  | -3.19553 | 1.56860  | -0.95401 |
| H  | -2.44460 | 2.31292  | -0.68469 |
| H  | -3.11154 | 1.37231  | -2.02431 |
| H  | -4.18124 | 1.99767  | -0.76371 |
| H  | 6.57939  | 0.57129  | 0.14930  |
| H  | -3.77331 | 0.86408  | 1.93726  |
| H  | -4.14836 | -1.88969 | -0.09105 |

TMS-OH.log Energy: -304445.1068209

|    |          |          |          |
|----|----------|----------|----------|
| O  | 0.09379  | -0.07705 | 1.69889  |
| Si | 0.00688  | 0.00014  | 0.02239  |
| C  | -1.04636 | -1.40314 | -0.60847 |
| H  | -2.06237 | -1.33680 | -0.21289 |
| H  | -1.11059 | -1.37477 | -1.69866 |
| H  | -0.63083 | -2.37017 | -0.31885 |
| C  | 1.76959  | -0.15678 | -0.54803 |
| H  | 2.19342  | -1.12048 | -0.25951 |
| H  | 1.82483  | -0.07685 | -1.63585 |
| H  | 2.39185  | 0.63262  | -0.12203 |
| C  | -0.73018 | 1.63033  | -0.50212 |
| H  | -1.74443 | 1.74590  | -0.11389 |
| H  | -0.13102 | 2.47018  | -0.14524 |
| H  | -0.78114 | 1.69029  | -1.59185 |
| H  | -0.75477 | -0.06797 | 2.14593  |

TMS\_+OH2.log Energy: -304710.2144385

|    |          |          |          |
|----|----------|----------|----------|
| O  | -0.05504 | -0.12575 | 1.66578  |
| Si | 0.00640  | 0.00058  | -0.15555 |
| C  | -1.59435 | -0.78850 | -0.60498 |
| H  | -2.43343 | -0.24669 | -0.16555 |
| H  | -1.71448 | -0.76958 | -1.69024 |
| H  | -1.63008 | -1.82701 | -0.27493 |
| C  | 1.53289  | -0.95809 | -0.52494 |

|   |          |          |          |
|---|----------|----------|----------|
| H | 1.43127  | -1.99841 | -0.21512 |
| H | 1.72147  | -0.93667 | -1.60042 |
| H | 2.39845  | -0.52104 | -0.02451 |
| C | 0.11472  | 1.80848  | -0.49342 |
| H | -0.76387 | 2.32948  | -0.11046 |
| H | 1.00719  | 2.23777  | -0.03584 |
| H | 0.16959  | 1.97948  | -1.57063 |
| H | -0.85986 | 0.18166  | 2.10742  |
| H | 0.70485  | 0.19767  | 2.17185  |

TriSil-1n\_H+.log      Energy: -1033315.7661941

|    |          |          |          |
|----|----------|----------|----------|
| C  | -0.51873 | -0.99652 | 0.22916  |
| H  | -0.57119 | -2.07427 | 0.41344  |
| H  | -0.32066 | -0.87595 | -0.83755 |
| O  | 2.35942  | -0.62525 | 0.53486  |
| O  | 0.81682  | 1.42191  | 1.04492  |
| Si | 3.18341  | -1.62462 | -0.53498 |
| Si | 1.29756  | 2.49965  | -0.30958 |
| C  | 4.10715  | -2.86931 | 0.48917  |
| H  | 3.41667  | -3.48536 | 1.06865  |
| H  | 4.69500  | -3.53082 | -0.15079 |
| H  | 4.78981  | -2.37571 | 1.18338  |
| C  | 4.33583  | -0.52098 | -1.48732 |
| H  | 4.90357  | -1.10882 | -2.21225 |
| H  | 3.78569  | 0.24829  | -2.03280 |
| H  | 5.04772  | -0.02798 | -0.82292 |
| C  | 1.96579  | -2.45866 | -1.66780 |
| H  | 1.25047  | -3.06660 | -1.11122 |
| H  | 1.41076  | -1.73442 | -2.26639 |
| H  | 2.50484  | -3.11748 | -2.35291 |
| C  | 0.23157  | 3.97259  | 0.00572  |
| H  | 0.42953  | 4.39735  | 0.99129  |
| H  | 0.43800  | 4.74300  | -0.73986 |
| H  | -0.82515 | 3.70967  | -0.05924 |
| C  | 0.85320  | 1.55802  | -1.83343 |
| H  | -0.21364 | 1.33235  | -1.85761 |
| H  | 1.08762  | 2.18104  | -2.70001 |
| H  | 1.41542  | 0.63034  | -1.93487 |
| C  | 3.10295  | 2.78887  | -0.07354 |
| H  | 3.28940  | 3.31817  | 0.86196  |

|    |          |          |          |
|----|----------|----------|----------|
| H  | 3.65452  | 1.84937  | -0.06073 |
| H  | 3.48696  | 3.39976  | -0.89345 |
| C  | -1.84715 | -0.33086 | 0.60362  |
| H  | -2.05132 | -0.45552 | 1.66944  |
| H  | -1.80004 | 0.74258  | 0.40597  |
| C  | -2.99314 | -0.92315 | -0.18823 |
| H  | -2.82211 | -0.78673 | -1.26260 |
| H  | -3.07456 | -1.99902 | 0.00554  |
| C  | -5.31709 | -0.77843 | -0.51681 |
| H  | -5.42950 | -1.85355 | -0.33770 |
| H  | -5.18810 | -0.62195 | -1.59366 |
| C  | -6.54239 | -0.04043 | -0.02699 |
| H  | -6.66807 | -0.20559 | 1.04593  |
| H  | -6.42307 | 1.03179  | -0.20276 |
| O  | -4.19874 | -0.27850 | 0.18851  |
| O  | -7.66123 | -0.54555 | -0.74649 |
| Si | 0.91630  | -0.34375 | 1.19148  |
| C  | 0.84062  | -0.60635 | 3.00712  |
| H  | -0.09081 | -0.21097 | 3.41636  |
| H  | 0.87770  | -1.67523 | 3.22557  |
| H  | 1.67857  | -0.12097 | 3.50827  |
| H  | -8.44959 | -0.11282 | -0.41369 |
| H  | 0.36199  | 1.86844  | 1.77183  |

TS1a-IRC-prod.log Energy: -1081288.9122126

|    |          |          |          |
|----|----------|----------|----------|
| C  | -0.76714 | -1.16565 | 0.16211  |
| H  | -0.91407 | -2.24664 | 0.25407  |
| H  | -0.53679 | -0.97443 | -0.88716 |
| O  | 2.11292  | -1.16849 | 0.57962  |
| O  | 0.78901  | 1.01247  | 1.23966  |
| Si | 2.86705  | -2.03998 | -0.63279 |
| Si | 1.54233  | 2.32217  | 0.03486  |
| C  | 3.71455  | -3.47958 | 0.18307  |
| H  | 2.98949  | -4.13203 | 0.67365  |
| H  | 4.25794  | -4.07299 | -0.55544 |
| H  | 4.42923  | -3.13778 | 0.93412  |
| C  | 4.09320  | -0.89397 | -1.43418 |
| H  | 4.64675  | -1.42353 | -2.21317 |
| H  | 3.59077  | -0.04265 | -1.89724 |
| H  | 4.81288  | -0.51417 | -0.70710 |

|    |          |          |          |
|----|----------|----------|----------|
| C  | 1.60903  | -2.62363 | -1.87476 |
| H  | 0.84022  | -3.24347 | -1.41052 |
| H  | 1.12101  | -1.78603 | -2.37618 |
| H  | 2.10999  | -3.22444 | -2.63779 |
| C  | 0.58111  | 3.68710  | 0.85449  |
| H  | 0.78395  | 3.69161  | 1.92802  |
| H  | 0.82728  | 4.67129  | 0.46294  |
| H  | -0.48868 | 3.51888  | 0.71776  |
| C  | 0.86190  | 1.49234  | -1.48293 |
| H  | -0.22433 | 1.42215  | -1.40406 |
| H  | 1.10509  | 2.03464  | -2.39388 |
| H  | 1.25661  | 0.48143  | -1.58482 |
| C  | 3.32415  | 2.07352  | 0.50898  |
| H  | 3.44618  | 1.23972  | 1.19792  |
| H  | 3.93443  | 1.88539  | -0.37389 |
| H  | 3.70335  | 2.97685  | 0.99037  |
| C  | -2.04477 | -0.42416 | 0.56646  |
| H  | -2.27629 | -0.60306 | 1.61917  |
| H  | -1.90704 | 0.65264  | 0.44412  |
| C  | -3.22196 | -0.86842 | -0.27493 |
| H  | -3.02347 | -0.67902 | -1.33656 |
| H  | -3.39228 | -1.94441 | -0.15204 |
| C  | -5.52698 | -0.53942 | -0.60312 |
| H  | -5.72661 | -1.60767 | -0.46213 |
| H  | -5.37474 | -0.35779 | -1.67296 |
| C  | -6.69458 | 0.27772  | -0.09820 |
| H  | -6.83358 | 0.10068  | 0.97141  |
| H  | -6.49530 | 1.34117  | -0.25204 |
| O  | -4.37994 | -0.15500 | 0.12780  |
| O  | -7.84741 | -0.12705 | -0.82749 |
| Si | 0.69300  | -0.72055 | 1.20929  |
| C  | 0.51944  | -1.18601 | 2.98337  |
| H  | -0.36583 | -0.72289 | 3.42307  |
| H  | 0.41370  | -2.26850 | 3.07486  |
| H  | 1.39449  | -0.87617 | 3.55616  |
| H  | -8.58660 | 0.41203  | -0.54000 |
| H  | 0.47677  | 1.40889  | 2.06085  |
| O  | 2.33595  | 3.92922  | -1.37585 |
| H  | 2.85177  | 4.57986  | -0.88834 |
| H  | 2.94849  | 3.54916  | -2.01425 |

TS1a-IRC-prod\_-H.log      Energy: -1081024.1636646

|    |          |          |          |
|----|----------|----------|----------|
| C  | -0.42998 | -1.07236 | -0.12072 |
| H  | -0.32307 | -1.72604 | -0.99191 |
| H  | -0.29606 | -0.05415 | -0.49507 |
| O  | 2.36002  | -0.82408 | 0.44187  |
| O  | 0.71378  | -0.70605 | 2.52031  |
| Si | 3.37972  | -1.13086 | -0.83574 |
| Si | 0.77164  | 3.07133  | 0.16752  |
| C  | 4.46801  | -2.57477 | -0.38443 |
| H  | 3.86883  | -3.47053 | -0.20740 |
| H  | 5.17373  | -2.79469 | -1.18870 |
| H  | 5.04155  | -2.36525 | 0.52066  |
| C  | 4.37683  | 0.42201  | -1.07892 |
| H  | 5.12046  | 0.28618  | -1.86735 |
| H  | 3.73454  | 1.25836  | -1.36023 |
| H  | 4.90330  | 0.69043  | -0.16069 |
| C  | 2.37519  | -1.53818 | -2.35393 |
| H  | 1.78769  | -2.44677 | -2.20398 |
| H  | 1.69120  | -0.72805 | -2.61345 |
| H  | 3.03743  | -1.70684 | -3.20650 |
| C  | -0.84006 | 2.56274  | 0.94840  |
| H  | -0.87038 | 1.49188  | 1.15302  |
| H  | -0.98864 | 3.08609  | 1.89530  |
| H  | -1.68101 | 2.79984  | 0.29362  |
| C  | 1.01003  | 2.30037  | -1.51390 |
| H  | 0.11905  | 2.41761  | -2.13383 |
| H  | 1.85027  | 2.76502  | -2.03490 |
| H  | 1.22454  | 1.23470  | -1.42398 |
| C  | 2.22424  | 2.66624  | 1.26371  |
| H  | 2.32865  | 1.58638  | 1.38441  |
| H  | 3.15438  | 3.04250  | 0.83136  |
| H  | 2.10557  | 3.11130  | 2.25364  |
| C  | -1.82949 | -1.21934 | 0.47993  |
| H  | -2.02177 | -2.25994 | 0.75176  |
| H  | -1.91213 | -0.62862 | 1.39523  |
| C  | -2.89055 | -0.75177 | -0.49239 |
| H  | -2.71826 | 0.29914  | -0.75621 |
| H  | -2.85129 | -1.34034 | -1.41676 |
| C  | -5.20569 | -0.43591 | -0.74962 |

|    |          |          |          |
|----|----------|----------|----------|
| H  | -5.21280 | -1.01694 | -1.67877 |
| H  | -5.05316 | 0.61843  | -1.00671 |
| C  | -6.51989 | -0.60604 | -0.02161 |
| H  | -6.67011 | -1.65891 | 0.23009  |
| H  | -6.50777 | -0.02481 | 0.90387  |
| O  | -4.17223 | -0.88609 | 0.10242  |
| O  | -7.54916 | -0.14577 | -0.88986 |
| Si | 0.96912  | -1.44729 | 1.05316  |
| C  | 1.14005  | -3.25595 | 1.40964  |
| H  | 0.23022  | -3.65262 | 1.86418  |
| H  | 1.31789  | -3.80405 | 0.48188  |
| H  | 1.97506  | -3.44970 | 2.08495  |
| H  | -8.38981 | -0.25623 | -0.44216 |
| H  | 0.60075  | 0.24689  | 2.48728  |
| O  | 0.63391  | 4.73739  | -0.00220 |
| H  | 1.38167  | 5.15976  | -0.42897 |

TS1a-IRC-react.log Energy: -1081289.9951684

|    |          |          |          |
|----|----------|----------|----------|
| C  | -0.76129 | -1.26291 | 0.07089  |
| H  | -0.89667 | -2.34305 | -0.04237 |
| H  | -0.51821 | -0.87751 | -0.92113 |
| O  | 2.12240  | -1.21621 | 0.48727  |
| O  | 0.72718  | 0.74595  | 1.50274  |
| Si | 2.90299  | -1.94845 | -0.80781 |
| Si | 1.34165  | 2.08535  | 0.47395  |
| C  | 3.72952  | -3.47490 | -0.14572 |
| H  | 2.99221  | -4.17454 | 0.25304  |
| H  | 4.28363  | -3.98345 | -0.93762 |
| H  | 4.43116  | -3.22565 | 0.65240  |
| C  | 4.14027  | -0.71321 | -1.43838 |
| H  | 4.67511  | -1.12766 | -2.29607 |
| H  | 3.65158  | 0.20884  | -1.75887 |
| H  | 4.87617  | -0.46367 | -0.67198 |
| C  | 1.66100  | -2.37928 | -2.12422 |
| H  | 0.89599  | -3.06046 | -1.74766 |
| H  | 1.16728  | -1.49093 | -2.52136 |
| H  | 2.17436  | -2.87568 | -2.95129 |
| C  | 0.41399  | 3.52636  | 1.15762  |
| H  | 0.61575  | 3.65363  | 2.22263  |
| H  | 0.72821  | 4.43701  | 0.64355  |



|    |          |          |          |
|----|----------|----------|----------|
| H  | -0.66047 | 3.40576  | 1.01349  |
| C  | 0.84787  | 1.61802  | -1.24218 |
| H  | -0.23412 | 1.49954  | -1.31563 |
| H  | 1.14564  | 2.42663  | -1.91390 |
| H  | 1.32931  | 0.70525  | -1.59039 |
| C  | 3.15833  | 2.12628  | 0.79206  |
| H  | 3.60841  | 1.14739  | 0.63221  |
| H  | 3.64054  | 2.83841  | 0.11919  |
| H  | 3.35759  | 2.43842  | 1.81833  |
| C  | -2.05135 | -0.61820 | 0.58800  |
| H  | -2.31689 | -1.02324 | 1.56701  |
| H  | -1.91243 | 0.45864  | 0.70899  |
| C  | -3.19643 | -0.85631 | -0.37290 |
| H  | -2.95554 | -0.43782 | -1.35734 |
| H  | -3.37307 | -1.93089 | -0.49873 |
| C  | -5.47128 | -0.38831 | -0.73494 |
| H  | -5.68455 | -1.45083 | -0.89691 |
| H  | -5.25488 | 0.06966  | -1.70666 |
| C  | -6.66219 | 0.28911  | -0.09559 |
| H  | -6.88093 | -0.17908 | 0.86742  |
| H  | -6.43897 | 1.34559  | 0.07349  |
| O  | -4.36677 | -0.23666 | 0.13425  |
| O  | -7.76334 | 0.14522  | -0.98524 |
| Si | 0.68730  | -1.00002 | 1.18585  |
| C  | 0.54321  | -1.72089 | 2.86806  |
| H  | -0.36263 | -1.36772 | 3.36410  |
| H  | 0.48637  | -2.80877 | 2.79762  |
| H  | 1.40516  | -1.45810 | 3.48196  |
| H  | -8.52648 | 0.56573  | -0.58487 |
| H  | 0.27213  | 1.03191  | 2.30642  |
| O  | 2.67380  | 4.85024  | -1.64338 |
| H  | 2.98080  | 4.96571  | -0.74090 |
| H  | 2.99524  | 3.98172  | -1.89727 |

TS1a.1-IRC-prod.log Energy: -1081294.7503285

|   |          |          |          |
|---|----------|----------|----------|
| C | -0.65560 | -0.97799 | -0.10136 |
| H | -0.61188 | -1.71255 | -0.91043 |
| H | -0.46247 | -0.00647 | -0.56343 |
| O | 2.16451  | -0.67036 | 0.35638  |
| O | 2.32573  | 1.78258  | 0.77314  |

|    |          |          |          |
|----|----------|----------|----------|
| Si | 3.24939  | -1.39161 | -0.83944 |
| Si | 1.24781  | 2.89089  | 0.03917  |
| C  | 4.25617  | -2.64313 | 0.07306  |
| H  | 3.63965  | -3.46641 | 0.43342  |
| H  | 5.01591  | -3.05371 | -0.59585 |
| H  | 4.76473  | -2.18706 | 0.92372  |
| C  | 4.23499  | 0.05309  | -1.43440 |
| H  | 4.97271  | -0.29537 | -2.16050 |
| H  | 3.60373  | 0.79583  | -1.92208 |
| H  | 4.77076  | 0.53065  | -0.61299 |
| C  | 2.13404  | -2.11889 | -2.12349 |
| H  | 1.54981  | -2.95504 | -1.73542 |
| H  | 1.45235  | -1.36477 | -2.51993 |
| H  | 2.74087  | -2.49627 | -2.94984 |
| C  | -0.38161 | 2.80806  | 0.93105  |
| H  | -0.25462 | 3.03473  | 1.99165  |
| H  | -1.06684 | 3.54903  | 0.51241  |
| H  | -0.85558 | 1.82922  | 0.84424  |
| C  | 1.14177  | 2.28857  | -1.71312 |
| H  | 0.97983  | 1.20990  | -1.75934 |
| H  | 0.30850  | 2.77473  | -2.22466 |
| H  | 2.05505  | 2.52118  | -2.26264 |
| C  | 1.99956  | 4.58139  | 0.17806  |
| H  | 2.12842  | 4.86805  | 1.22362  |
| H  | 2.97326  | 4.61982  | -0.31294 |
| H  | 1.35055  | 5.32190  | -0.29460 |
| C  | -2.04435 | -0.97301 | 0.54523  |
| H  | -2.27973 | -1.95679 | 0.95683  |
| H  | -2.07413 | -0.25994 | 1.37250  |
| C  | -3.10218 | -0.59000 | -0.46716 |
| H  | -2.89468 | 0.41038  | -0.86594 |
| H  | -3.09853 | -1.29357 | -1.30801 |
| C  | -5.40558 | -0.21644 | -0.73356 |
| H  | -5.43430 | -0.89328 | -1.59488 |
| H  | -5.22909 | 0.80004  | -1.10295 |
| C  | -6.71763 | -0.27474 | 0.01545  |
| H  | -6.89649 | -1.29264 | 0.37076  |
| H  | -6.68067 | 0.39432  | 0.87891  |
| O  | -4.37587 | -0.59922 | 0.15594  |
| O  | -7.73957 | 0.12860  | -0.88877 |

|    |          |          |          |
|----|----------|----------|----------|
| Si | 0.72087  | -1.32352 | 1.08448  |
| C  | 0.61608  | -0.51294 | 2.72794  |
| H  | -0.23687 | -0.90735 | 3.28252  |
| H  | 1.52124  | -0.69688 | 3.30791  |
| H  | 0.48215  | 0.56439  | 2.62242  |
| H  | -8.58012 | 0.08282  | -0.42978 |
| H  | 2.49180  | 1.91998  | 1.71035  |
| O  | 1.03331  | -2.92241 | 1.26369  |
| H  | 2.27501  | 0.35114  | 0.51760  |
| H  | 0.80800  | -3.49798 | 0.52911  |

TS1a.1-IRC-react.log Energy: -1081288.1398237

|    |          |          |          |
|----|----------|----------|----------|
| C  | -0.37939 | -0.88717 | -0.14212 |
| H  | -0.35589 | -1.92279 | -0.48748 |
| H  | -0.22180 | -0.27026 | -1.02520 |
| O  | 2.51606  | -1.17677 | 0.62883  |
| O  | 1.48097  | 1.17510  | 0.41362  |
| Si | 3.43558  | -1.21475 | -0.77377 |
| Si | 0.68769  | 2.65609  | -0.05689 |
| C  | 4.62161  | 0.22033  | -0.72732 |
| H  | 5.19550  | 0.22907  | 0.20127  |
| H  | 5.32771  | 0.14919  | -1.55794 |
| H  | 4.09841  | 1.17474  | -0.81823 |
| C  | 2.32485  | -1.08523 | -2.26316 |
| H  | 2.92860  | -1.15394 | -3.17130 |
| H  | 1.58610  | -1.88797 | -2.28932 |
| H  | 1.79784  | -0.12942 | -2.28328 |
| C  | 4.34183  | -2.83733 | -0.74586 |
| H  | 4.97086  | -2.91796 | 0.14278  |
| H  | 3.64143  | -3.67482 | -0.74530 |
| H  | 4.98400  | -2.93319 | -1.62392 |
| C  | -0.30583 | 3.24199  | 1.39243  |
| H  | 0.32247  | 3.36779  | 2.27547  |
| H  | -0.75866 | 4.20798  | 1.15670  |
| H  | -1.11056 | 2.54589  | 1.63385  |
| C  | -0.36506 | 2.28847  | -1.53400 |
| H  | -1.26602 | 1.73124  | -1.27660 |
| H  | -0.67932 | 3.24100  | -1.96849 |
| H  | 0.18906  | 1.73911  | -2.29639 |
| C  | 2.11940  | 3.76361  | -0.45404 |

|    |          |          |          |
|----|----------|----------|----------|
| H  | 2.79283  | 3.85915  | 0.40002  |
| H  | 2.68717  | 3.37692  | -1.30195 |
| H  | 1.76113  | 4.76213  | -0.71205 |
| C  | -1.74291 | -0.58088 | 0.48522  |
| H  | -1.91033 | -1.21140 | 1.36206  |
| H  | -1.78478 | 0.45619  | 0.82700  |
| C  | -2.86091 | -0.81125 | -0.50778 |
| H  | -2.72875 | -0.16518 | -1.38395 |
| H  | -2.85441 | -1.85156 | -0.85374 |
| C  | -5.19591 | -0.70706 | -0.76312 |
| H  | -5.21874 | -1.73884 | -1.13130 |
| H  | -5.10716 | -0.03736 | -1.62589 |
| C  | -6.46269 | -0.40199 | 0.00385  |
| H  | -6.54954 | -1.07893 | 0.85743  |
| H  | -6.43097 | 0.62522  | 0.37591  |
| O  | -4.10270 | -0.52371 | 0.11399  |
| O  | -7.55570 | -0.57859 | -0.88988 |
| Si | 1.03066  | -0.65727 | 1.04917  |
| C  | 0.76241  | -0.02993 | 2.77074  |
| H  | 0.51209  | -0.81499 | 3.48060  |
| H  | 1.66443  | 0.47757  | 3.11733  |
| H  | -0.04442 | 0.70421  | 2.76452  |
| H  | -8.36619 | -0.40542 | -0.40749 |
| H  | 2.36613  | 1.36858  | 0.74663  |
| O  | 0.72757  | -2.61859 | 1.77290  |
| H  | 0.90696  | -3.27050 | 1.08607  |
| H  | -0.17425 | -2.78939 | 2.06833  |

TS1a.1.log Energy: -1081264.6678509

|    |          |          |          |
|----|----------|----------|----------|
| C  | -0.42880 | -1.07193 | -0.08138 |
| H  | -0.43413 | -2.10852 | -0.42670 |
| H  | -0.25075 | -0.45788 | -0.96324 |
| O  | 2.58528  | -1.18905 | 0.54853  |
| O  | 1.38197  | 1.07405  | 0.46808  |
| Si | 3.52894  | -0.93630 | -0.88330 |
| Si | 0.54852  | 2.52622  | 0.01382  |
| C  | 4.55182  | 0.58322  | -0.60491 |
| H  | 5.07970  | 0.53079  | 0.34863  |
| H  | 5.29915  | 0.66122  | -1.39817 |
| H  | 3.95121  | 1.49328  | -0.62468 |

|    |          |          |          |
|----|----------|----------|----------|
| C  | 2.36239  | -0.77004 | -2.31231 |
| H  | 2.93486  | -0.71641 | -3.24119 |
| H  | 1.69181  | -1.62825 | -2.37848 |
| H  | 1.76386  | 0.13731  | -2.23189 |
| C  | 4.55093  | -2.47899 | -0.96802 |
| H  | 5.18042  | -2.58003 | -0.08239 |
| H  | 3.91429  | -3.36251 | -1.04240 |
| H  | 5.20044  | -2.45427 | -1.84522 |
| C  | -0.41856 | 3.10890  | 1.48516  |
| H  | 0.23209  | 3.26627  | 2.34698  |
| H  | -0.90436 | 4.05893  | 1.25016  |
| H  | -1.19605 | 2.39545  | 1.76267  |
| C  | -0.54784 | 2.14535  | -1.42891 |
| H  | -1.42820 | 1.56904  | -1.14664 |
| H  | -0.89727 | 3.09842  | -1.83504 |
| H  | -0.01787 | 1.62031  | -2.22393 |
| C  | 1.92135  | 3.68954  | -0.43637 |
| H  | 2.63217  | 3.80061  | 0.38492  |
| H  | 2.46144  | 3.33428  | -1.31545 |
| H  | 1.51429  | 4.67711  | -0.66333 |
| C  | -1.78778 | -0.72967 | 0.54177  |
| H  | -1.97023 | -1.34390 | 1.42639  |
| H  | -1.80978 | 0.31268  | 0.86819  |
| C  | -2.90403 | -0.95323 | -0.45564 |
| H  | -2.73473 | -0.34945 | -1.35518 |
| H  | -2.93585 | -2.00576 | -0.76064 |
| C  | -5.22573 | -0.75118 | -0.75380 |
| H  | -5.30524 | -1.79707 | -1.07073 |
| H  | -5.07868 | -0.13301 | -1.64650 |
| C  | -6.48584 | -0.32932 | -0.03275 |
| H  | -6.63129 | -0.95222 | 0.85338  |
| H  | -6.39808 | 0.71281  | 0.28472  |
| O  | -4.13972 | -0.58991 | 0.13694  |
| O  | -7.56989 | -0.48760 | -0.94087 |
| Si | 0.96966  | -0.87892 | 1.12248  |
| C  | 0.76678  | -0.19494 | 2.82621  |
| H  | 0.40083  | -0.95903 | 3.50988  |
| H  | 1.72633  | 0.16946  | 3.19869  |
| H  | 0.07228  | 0.64393  | 2.82289  |
| H  | -8.37620 | -0.22950 | -0.49050 |

|   |         |          |         |
|---|---------|----------|---------|
| H | 2.20053 | 1.31503  | 0.91877 |
| O | 1.27010 | -2.63549 | 1.59907 |
| H | 2.31810 | -2.24705 | 0.96898 |
| H | 0.78546 | -3.28856 | 1.08674 |

TS1a.log      Energy: -1081288.8741353

|    |          |          |          |
|----|----------|----------|----------|
| C  | -0.74142 | -1.21099 | 0.15052  |
| H  | -0.88246 | -2.29376 | 0.22795  |
| H  | -0.51033 | -1.00329 | -0.89552 |
| O  | 2.14434  | -1.13627 | 0.55747  |
| O  | 0.76251  | 0.97678  | 1.27500  |
| Si | 2.92153  | -1.98574 | -0.65809 |
| Si | 1.44651  | 2.29013  | 0.09333  |
| C  | 3.79122  | -3.41494 | 0.15190  |
| H  | 3.07553  | -4.08305 | 0.63512  |
| H  | 4.34771  | -3.99415 | -0.58809 |
| H  | 4.49672  | -3.06559 | 0.90810  |
| C  | 4.12661  | -0.80580 | -1.44098 |
| H  | 4.69667  | -1.31503 | -2.22158 |
| H  | 3.60772  | 0.03843  | -1.89879 |
| H  | 4.83316  | -0.41722 | -0.70567 |
| C  | 1.67746  | -2.58247 | -1.90739 |
| H  | 0.92066  | -3.22146 | -1.44928 |
| H  | 1.17311  | -1.75019 | -2.40150 |
| H  | 2.19054  | -3.16649 | -2.67533 |
| C  | 0.44988  | 3.64384  | 0.88363  |
| H  | 0.70571  | 3.71996  | 1.94319  |
| H  | 0.61642  | 4.61552  | 0.42558  |
| H  | -0.61340 | 3.40695  | 0.81135  |
| C  | 0.81831  | 1.50299  | -1.46540 |
| H  | -0.26529 | 1.38623  | -1.40818 |
| H  | 1.05421  | 2.10315  | -2.34122 |
| H  | 1.25784  | 0.51611  | -1.61136 |
| C  | 3.24830  | 2.13355  | 0.52179  |
| H  | 3.42700  | 1.28204  | 1.17656  |
| H  | 3.84987  | 2.00993  | -0.37799 |
| H  | 3.58703  | 3.03715  | 1.03118  |
| C  | -2.02258 | -0.48008 | 0.56424  |
| H  | -2.25543 | -0.67628 | 1.61358  |
| H  | -1.88782 | 0.59903  | 0.45929  |

|    |          |          |          |
|----|----------|----------|----------|
| C  | -3.19771 | -0.91242 | -0.28610 |
| H  | -2.99637 | -0.70893 | -1.34455 |
| H  | -3.36993 | -1.98966 | -0.17798 |
| C  | -5.50219 | -0.57366 | -0.61280 |
| H  | -5.70839 | -1.64187 | -0.48135 |
| H  | -5.34645 | -0.38372 | -1.68068 |
| C  | -6.66572 | 0.24645  | -0.10326 |
| H  | -6.80662 | 0.06272  | 0.96500  |
| H  | -6.46007 | 1.30976  | -0.24936 |
| O  | -4.35479 | -0.20194 | 0.12406  |
| O  | -7.82033 | -0.14622 | -0.83622 |
| Si | 0.71268  | -0.76499 | 1.20457  |
| C  | 0.55753  | -1.26901 | 2.96820  |
| H  | -0.34218 | -0.84311 | 3.41625  |
| H  | 0.48629  | -2.35589 | 3.03860  |
| H  | 1.42275  | -0.94184 | 3.54599  |
| H  | -8.55524 | 0.39883  | -0.54902 |
| H  | 0.35101  | 1.35635  | 2.06065  |
| O  | 2.25501  | 4.05321  | -1.36433 |
| H  | 2.68603  | 4.72046  | -0.82170 |
| H  | 2.95187  | 3.70836  | -1.93069 |

4water-anion3.log      Energy: -191916.6352938

|   |          |          |          |
|---|----------|----------|----------|
| O | 1.00912  | -0.30068 | 1.91999  |
| H | 1.85288  | -0.60602 | 1.57125  |
| O | 1.68374  | -0.21323 | -1.57596 |
| O | -1.77437 | -1.66456 | -0.35408 |
| O | -1.05653 | 2.18711  | -0.15007 |
| H | -0.70797 | 1.25364  | -0.16662 |
| H | 0.46524  | -0.15092 | 1.10222  |
| H | -1.08836 | -0.94392 | -0.29618 |
| H | -2.13987 | -1.69758 | 0.53577  |
| H | 2.34782  | -0.45266 | -0.92127 |
| H | 0.85935  | -0.09952 | -1.03070 |
| H | -0.48472 | 2.62785  | 0.48654  |

4water-neutral-from-anion4.log      Energy: -191901.4936102

|   |         |          |          |
|---|---------|----------|----------|
| O | 0.52855 | -1.89066 | -0.05689 |
| H | 1.07603 | -1.08081 | -0.04938 |
| O | 1.88592 | 0.52804  | -0.14123 |

|   |          |          |          |
|---|----------|----------|----------|
| O | -1.88672 | -0.52886 | 0.07643  |
| O | -0.53253 | 1.88896  | -0.05694 |
| H | -1.07692 | 1.07949  | 0.00602  |
| H | 0.66480  | -2.29487 | 0.80296  |
| H | -2.34658 | -0.65778 | -0.75613 |
| H | -1.07930 | -1.07592 | 0.01200  |
| H | 2.34733  | 0.65275  | 0.69113  |
| H | 1.07922  | 1.07562  | -0.07223 |
| H | -0.62637 | 2.32161  | 0.79469  |

P1b.1.log      Energy: -1080701.0549728

|    |          |          |          |
|----|----------|----------|----------|
| C  | -1.05805 | -0.68531 | -0.48427 |
| H  | -1.05994 | -1.76719 | -0.32247 |
| H  | -1.04618 | -0.53760 | -1.56915 |
| O  | 1.83012  | -0.68209 | -0.51300 |
| O  | 0.52912  | 1.61213  | -0.16785 |
| Si | 2.93174  | -1.96638 | -0.11692 |
| Si | 1.72927  | 2.76129  | -0.15096 |
| C  | 3.58478  | -1.99729 | 1.67617  |
| H  | 3.75516  | -0.98186 | 2.04283  |
| H  | 2.91921  | -2.50642 | 2.37647  |
| H  | 4.55359  | -2.50562 | 1.70431  |
| C  | 3.70551  | -3.10577 | -1.44566 |
| H  | 3.50945  | -4.16169 | -1.24816 |
| H  | 3.23449  | -2.87126 | -2.40716 |
| H  | 4.78010  | -2.96754 | -1.57352 |
| C  | 1.45308  | -3.23733 | 0.19507  |
| H  | 0.73204  | -2.90617 | 0.94971  |
| H  | 0.89151  | -3.44579 | -0.72365 |
| H  | 1.86158  | -4.19301 | 0.54571  |
| C  | 0.88084  | 4.41772  | -0.05434 |
| H  | 0.29204  | 4.50368  | 0.86119  |
| H  | 1.61433  | 5.22714  | -0.06107 |
| H  | 0.21109  | 4.56379  | -0.90438 |
| C  | 2.72558  | 2.63831  | -1.72293 |
| H  | 2.08774  | 2.78103  | -2.59788 |
| H  | 3.50435  | 3.40412  | -1.74556 |
| H  | 3.20653  | 1.66248  | -1.81070 |
| C  | 2.83455  | 2.52062  | 1.33586  |
| H  | 2.26765  | 2.61092  | 2.26453  |



|    |          |          |          |
|----|----------|----------|----------|
| H  | 3.32241  | 1.54366  | 1.33221  |
| H  | 3.61655  | 3.28377  | 1.34350  |
| C  | -2.32416 | -0.06919 | 0.11505  |
| H  | -2.33909 | -0.21486 | 1.19819  |
| H  | -2.34209 | 1.00866  | -0.06244 |
| C  | -3.57586 | -0.68358 | -0.47402 |
| H  | -3.60016 | -0.53301 | -1.55996 |
| H  | -3.59318 | -1.76372 | -0.28566 |
| C  | -5.92555 | -0.63417 | -0.37958 |
| H  | -5.96741 | -1.70827 | -0.16589 |
| H  | -5.99041 | -0.49909 | -1.46521 |
| C  | -7.07564 | 0.07369  | 0.30042  |
| H  | -7.00092 | -0.05670 | 1.38304  |
| H  | -7.03797 | 1.14241  | 0.07505  |
| O  | -4.72135 | -0.08299 | 0.11264  |
| O  | -8.28083 | -0.50083 | -0.19186 |
| Si | 0.53761  | -0.00575 | 0.20656  |
| C  | 0.58169  | -0.15875 | 2.06614  |
| H  | -0.17535 | 0.49000  | 2.51198  |
| H  | 0.37988  | -1.18147 | 2.38810  |
| H  | 1.55396  | 0.13475  | 2.46396  |
| H  | -9.01734 | -0.05038 | 0.22512  |
| O  | 4.29630  | -0.74031 | -0.58879 |
| H  | 4.02813  | 0.12606  | -0.28120 |

TS1b.1-IRC-react.log Energy: -1080713.1661628

|    |          |          |          |
|----|----------|----------|----------|
| C  | -1.22055 | -0.66264 | -0.38462 |
| H  | -1.26526 | -1.74898 | -0.25215 |
| H  | -1.17685 | -0.48699 | -1.46404 |
| O  | 1.63111  | -0.84737 | -0.38577 |
| O  | 0.54624  | 1.52928  | 0.03122  |
| Si | 2.48343  | -2.25238 | -0.12232 |
| Si | 1.92290  | 2.46759  | -0.09176 |
| C  | 3.57945  | -2.04407 | 1.37060  |
| H  | 4.28047  | -1.21902 | 1.22663  |
| H  | 2.99590  | -1.84807 | 2.27169  |
| H  | 4.16258  | -2.95290 | 1.53814  |
| C  | 3.50755  | -2.52352 | -1.65177 |
| H  | 4.11806  | -3.42416 | -1.55737 |
| H  | 2.87403  | -2.63399 | -2.53407 |

|    |          |          |          |
|----|----------|----------|----------|
| H  | 4.17847  | -1.67682 | -1.81504 |
| C  | 1.27451  | -3.64814 | 0.14499  |
| H  | 0.65646  | -3.47054 | 1.02795  |
| H  | 0.61347  | -3.76440 | -0.71614 |
| H  | 1.80479  | -4.59168 | 0.29295  |
| C  | 1.36599  | 4.23897  | 0.04467  |
| H  | 0.87646  | 4.42312  | 1.00305  |
| H  | 2.22030  | 4.91512  | -0.03327 |
| H  | 0.66312  | 4.49174  | -0.75174 |
| C  | 2.72740  | 2.15848  | -1.74466 |
| H  | 2.03959  | 2.39147  | -2.56050 |
| H  | 3.61455  | 2.78485  | -1.86193 |
| H  | 3.03317  | 1.11559  | -1.84460 |
| C  | 3.08844  | 2.03469  | 1.29947  |
| H  | 2.63115  | 2.23780  | 2.27006  |
| H  | 3.37178  | 0.98072  | 1.27011  |
| H  | 4.00205  | 2.62880  | 1.22538  |
| C  | -2.47428 | -0.01314 | 0.20560  |
| H  | -2.53120 | -0.20707 | 1.27944  |
| H  | -2.43536 | 1.07108  | 0.07721  |
| C  | -3.73168 | -0.53835 | -0.45338 |
| H  | -3.70914 | -0.33445 | -1.53050 |
| H  | -3.80640 | -1.62417 | -0.31971 |
| C  | -6.07509 | -0.34884 | -0.46370 |
| H  | -6.18471 | -1.43269 | -0.34456 |
| H  | -6.08134 | -0.12048 | -1.53553 |
| C  | -7.21584 | 0.36564  | 0.22501  |
| H  | -7.21038 | 0.12898  | 1.29191  |
| H  | -7.10033 | 1.44612  | 0.10735  |
| O  | -4.86678 | 0.08922  | 0.12368  |
| O  | -8.42406 | -0.07894 | -0.38145 |
| Si | 0.38059  | -0.07745 | 0.35833  |
| C  | 0.42938  | -0.35370 | 2.19533  |
| H  | -0.36560 | 0.21401  | 2.68317  |
| H  | 0.28452  | -1.40901 | 2.43636  |
| H  | 1.38276  | -0.03269 | 2.61727  |
| H  | -9.15660 | 0.35250  | 0.06175  |
| O  | 5.83657  | 0.48777  | -0.61341 |
| H  | 4.88633  | 0.43553  | -0.49808 |

TS1b-IRC-prod.log Energy: -1080707.2809147

|    |          |          |          |
|----|----------|----------|----------|
| C  | -0.49343 | -1.11565 | 0.22715  |
| H  | -0.60822 | -2.19941 | 0.29128  |
| H  | -0.27241 | -0.90428 | -0.82558 |
| O  | 2.48740  | -0.21735 | 0.34132  |
| O  | 0.59974  | 1.15404  | 1.20301  |
| Si | 3.33679  | -0.92689 | -0.87391 |
| Si | 0.66545  | 2.32393  | 0.07064  |
| C  | 4.62998  | -2.10788 | -0.21008 |
| H  | 4.18422  | -3.01386 | 0.20380  |
| H  | 5.31265  | -2.40690 | -1.00965 |
| H  | 5.22436  | -1.63252 | 0.57371  |
| C  | 4.22022  | 0.45450  | -1.77824 |
| H  | 4.82354  | 0.05423  | -2.59686 |
| H  | 3.50750  | 1.16590  | -2.20102 |
| H  | 4.88657  | 1.00268  | -1.10844 |
| C  | 2.24732  | -1.82725 | -2.10215 |
| H  | 1.71343  | -2.65570 | -1.63570 |
| H  | 1.51152  | -1.15942 | -2.55386 |
| H  | 2.86578  | -2.23255 | -2.90757 |
| C  | -0.67014 | 3.58575  | 0.46329  |
| H  | -0.54085 | 3.99800  | 1.46697  |
| H  | -0.64541 | 4.41742  | -0.24556 |
| H  | -1.66330 | 3.13257  | 0.41281  |
| C  | 0.34666  | 1.71621  | -1.67746 |
| H  | -0.63989 | 1.25508  | -1.76334 |
| H  | 0.38288  | 2.55908  | -2.37305 |
| H  | 1.09120  | 0.98707  | -1.99674 |
| C  | 2.31535  | 3.21965  | 0.09144  |
| H  | 2.49469  | 3.67473  | 1.06891  |
| H  | 3.13847  | 2.53495  | -0.11642 |
| H  | 2.33783  | 4.01678  | -0.65622 |
| C  | -1.82329 | -0.45781 | 0.59283  |
| H  | -2.05756 | -0.63242 | 1.64722  |
| H  | -1.76782 | 0.62234  | 0.45730  |
| C  | -2.95749 | -0.99598 | -0.25255 |
| H  | -2.75964 | -0.80848 | -1.31555 |
| H  | -3.05862 | -2.07982 | -0.11916 |
| C  | -5.27578 | -0.84216 | -0.62938 |
| H  | -5.38882 | -1.92343 | -0.49018 |

|    |          |          |          |
|----|----------|----------|----------|
| H  | -5.12327 | -0.64992 | -1.69770 |
| C  | -6.51682 | -0.12700 | -0.14513 |
| H  | -6.66460 | -0.32520 | 0.91934  |
| H  | -6.40198 | 0.95084  | -0.28594 |
| O  | -4.17665 | -0.36377 | 0.11757  |
| O  | -7.61698 | -0.61760 | -0.90335 |
| Si | 1.06918  | -0.60581 | 1.20011  |
| C  | 1.13735  | -0.60292 | 3.09932  |
| H  | 2.06235  | -1.06583 | 3.45378  |
| H  | 1.05171  | 0.38615  | 3.54923  |
| H  | 0.31926  | -1.22021 | 3.48349  |
| H  | -8.41593 | -0.20493 | -0.57049 |
| O  | 1.54585  | -2.40798 | 1.20823  |
| H  | 2.42601  | -2.49546 | 1.57694  |

TS1b-IRC-react.log Energy: -1080713.8656665

|    |          |          |          |
|----|----------|----------|----------|
| C  | -0.36338 | -0.89301 | 0.13901  |
| H  | -0.31026 | -1.98428 | 0.20907  |
| H  | -0.21038 | -0.64845 | -0.91443 |
| O  | 2.46976  | -0.86173 | 0.60186  |
| O  | 1.13554  | 1.42916  | 1.01559  |
| Si | 3.30480  | -1.03658 | -0.82824 |
| Si | 0.65876  | 2.68669  | 0.03911  |
| C  | 4.71643  | -2.19021 | -0.45244 |
| H  | 4.34402  | -3.15461 | -0.10047 |
| H  | 5.32025  | -2.36498 | -1.34552 |
| H  | 5.36697  | -1.77431 | 0.31958  |
| C  | 3.93710  | 0.62452  | -1.38932 |
| H  | 4.62284  | 0.49839  | -2.23075 |
| H  | 3.12077  | 1.26724  | -1.72137 |
| H  | 4.47536  | 1.13553  | -0.58912 |
| C  | 2.18737  | -1.76720 | -2.13014 |
| H  | 1.68329  | -2.66160 | -1.75834 |
| H  | 1.42820  | -1.05212 | -2.45195 |
| H  | 2.77426  | -2.04923 | -3.00766 |
| C  | -0.73032 | 3.59173  | 0.89161  |
| H  | -0.41154 | 3.96317  | 1.86774  |
| H  | -1.04847 | 4.44893  | 0.29360  |
| H  | -1.59738 | 2.94560  | 1.04057  |
| C  | 0.08896  | 2.05525  | -1.62260 |

|    |          |          |          |
|----|----------|----------|----------|
| H  | -0.86708 | 1.53427  | -1.54560 |
| H  | -0.04404 | 2.89826  | -2.30508 |
| H  | 0.81498  | 1.37346  | -2.06985 |
| C  | 2.12259  | 3.82349  | -0.15173 |
| H  | 2.46963  | 4.17126  | 0.82360  |
| H  | 2.95612  | 3.32804  | -0.65161 |
| H  | 1.84676  | 4.70048  | -0.74186 |
| C  | -1.74032 | -0.40488 | 0.59403  |
| H  | -1.93611 | -0.72459 | 1.62010  |
| H  | -1.78215 | 0.68688  | 0.58803  |
| C  | -2.83733 | -0.93102 | -0.30554 |
| H  | -2.66828 | -0.60407 | -1.33878 |
| H  | -2.84455 | -2.02740 | -0.29796 |
| C  | -5.16412 | -0.90729 | -0.64894 |
| H  | -5.20853 | -2.00202 | -0.62670 |
| H  | -5.03017 | -0.59164 | -1.68985 |
| C  | -6.44306 | -0.32565 | -0.09027 |
| H  | -6.56772 | -0.63962 | 0.94907  |
| H  | -6.39764 | 0.76598  | -0.12110 |
| O  | -4.09182 | -0.44363 | 0.14587  |
| O  | -7.51659 | -0.80619 | -0.89134 |
| Si | 1.05601  | -0.20945 | 1.13572  |
| C  | 0.90212  | -0.63466 | 2.93275  |
| H  | 0.86259  | -1.71755 | 3.06682  |
| H  | 1.75461  | -0.25211 | 3.49720  |
| H  | -0.00686 | -0.20477 | 3.35756  |
| H  | -8.33534 | -0.46079 | -0.53109 |
| O  | 1.65255  | -4.07395 | 1.13049  |
| H  | 1.90000  | -3.16837 | 0.93536  |

TS1b.1.log Energy: -1080699.0824156

|    |          |          |          |
|----|----------|----------|----------|
| C  | -1.05408 | -0.71101 | -0.44914 |
| H  | -1.05282 | -1.79213 | -0.28182 |
| H  | -1.04578 | -0.56746 | -1.53445 |
| O  | 1.82831  | -0.72433 | -0.48703 |
| O  | 0.55277  | 1.58312  | -0.16541 |
| Si | 2.78340  | -2.06523 | -0.09698 |
| Si | 1.75225  | 2.73641  | -0.14070 |
| C  | 3.63197  | -1.98448 | 1.58486  |
| H  | 3.78356  | -0.95142 | 1.89952  |

|    |          |          |          |
|----|----------|----------|----------|
| H  | 3.04989  | -2.49804 | 2.35368  |
| H  | 4.61701  | -2.45390 | 1.53495  |
| C  | 3.57968  | -2.97439 | -1.54380 |
| H  | 3.19029  | -3.98977 | -1.64330 |
| H  | 3.36663  | -2.44170 | -2.47338 |
| H  | 4.66370  | -3.02578 | -1.44283 |
| C  | 1.38815  | -3.33368 | 0.28837  |
| H  | 0.73109  | -3.03349 | 1.10906  |
| H  | 0.76233  | -3.52315 | -0.58923 |
| H  | 1.84277  | -4.28876 | 0.57400  |
| C  | 0.90315  | 4.38803  | 0.00493  |
| H  | 0.32763  | 4.45211  | 0.93060  |
| H  | 1.63585  | 5.19818  | 0.00634  |
| H  | 0.22147  | 4.55257  | -0.83208 |
| C  | 2.71841  | 2.63784  | -1.73149 |
| H  | 2.06886  | 2.81710  | -2.59092 |
| H  | 3.51342  | 3.38681  | -1.74755 |
| H  | 3.17621  | 1.65399  | -1.85083 |
| C  | 2.87488  | 2.45828  | 1.32580  |
| H  | 2.32648  | 2.56311  | 2.26400  |
| H  | 3.33039  | 1.46581  | 1.31159  |
| H  | 3.68073  | 3.19602  | 1.32237  |
| C  | -2.31772 | -0.09250 | 0.15354  |
| H  | -2.33976 | -0.25645 | 1.23386  |
| H  | -2.32453 | 0.98827  | -0.00609 |
| C  | -3.57157 | -0.68298 | -0.45505 |
| H  | -3.58743 | -0.50719 | -1.53727 |
| H  | -3.60086 | -1.76692 | -0.29153 |
| C  | -5.92071 | -0.57664 | -0.40588 |
| H  | -5.98980 | -1.66047 | -0.25903 |
| H  | -5.96308 | -0.37420 | -1.48211 |
| C  | -7.06696 | 0.11554  | 0.29641  |
| H  | -7.02796 | -0.09798 | 1.36752  |
| H  | -6.98864 | 1.19635  | 0.15373  |
| O  | -4.71377 | -0.08353 | 0.13857  |
| O  | -8.27498 | -0.37891 | -0.27018 |
| Si | 0.53720  | -0.02190 | 0.23361  |
| C  | 0.60145  | -0.17411 | 2.09031  |
| H  | -0.13819 | 0.48978  | 2.54279  |
| H  | 0.38008  | -1.19219 | 2.41440  |

|   |          |          |          |
|---|----------|----------|----------|
| H | 1.58312  | 0.09927  | 2.47882  |
| H | -9.00917 | 0.04569  | 0.17693  |
| O | 4.48597  | -0.57525 | -0.68118 |
| H | 4.17021  | 0.23787  | -0.28621 |

TS1b.log      Energy: -1080702.4828894

|    |          |          |          |
|----|----------|----------|----------|
| C  | -0.46678 | -1.06921 | 0.22045  |
| H  | -0.54087 | -2.14321 | 0.37985  |
| H  | -0.25451 | -0.92944 | -0.84399 |
| O  | 2.46278  | -0.31972 | 0.39338  |
| O  | 0.63692  | 1.26723  | 1.21277  |
| Si | 3.29201  | -0.98544 | -0.86889 |
| Si | 0.70438  | 2.44346  | 0.06027  |
| C  | 4.60193  | -2.16434 | -0.24624 |
| H  | 4.17810  | -3.10551 | 0.10613  |
| H  | 5.30518  | -2.39413 | -1.05076 |
| H  | 5.16936  | -1.71612 | 0.57246  |
| C  | 4.15449  | 0.42908  | -1.73799 |
| H  | 4.74531  | 0.05171  | -2.57646 |
| H  | 3.43810  | 1.15352  | -2.13033 |
| H  | 4.83223  | 0.95466  | -1.06178 |
| C  | 2.17755  | -1.84387 | -2.09839 |
| H  | 1.62775  | -2.66430 | -1.63744 |
| H  | 1.45797  | -1.15412 | -2.54295 |
| H  | 2.78737  | -2.25407 | -2.90787 |
| C  | -0.60750 | 3.70709  | 0.48019  |
| H  | -0.45214 | 4.12021  | 1.47919  |
| H  | -0.58964 | 4.53525  | -0.23231 |
| H  | -1.60336 | 3.25922  | 0.45018  |
| C  | 0.35645  | 1.77560  | -1.65338 |
| H  | -0.64391 | 1.34200  | -1.71423 |
| H  | 0.41370  | 2.58908  | -2.38118 |
| H  | 1.07649  | 1.01307  | -1.94988 |
| C  | 2.38457  | 3.26288  | 0.08533  |
| H  | 2.56198  | 3.75032  | 1.04681  |
| H  | 3.17932  | 2.53320  | -0.07442 |
| H  | 2.45924  | 4.02369  | -0.69534 |
| C  | -1.80365 | -0.40703 | 0.56198  |
| H  | -2.02350 | -0.52107 | 1.62736  |
| H  | -1.76762 | 0.66441  | 0.35996  |

|    |          |          |          |
|----|----------|----------|----------|
| C  | -2.93878 | -1.00919 | -0.23708 |
| H  | -2.75387 | -0.88387 | -1.31118 |
| H  | -3.02592 | -2.08351 | -0.03599 |
| C  | -5.26003 | -0.87603 | -0.60705 |
| H  | -5.37514 | -1.94876 | -0.41450 |
| H  | -5.11182 | -0.73613 | -1.68395 |
| C  | -6.49595 | -0.13313 | -0.15219 |
| H  | -6.64074 | -0.28036 | 0.92095  |
| H  | -6.37599 | 0.93631  | -0.34374 |
| O  | -4.15637 | -0.36411 | 0.11077  |
| O  | -7.60119 | -0.65278 | -0.88287 |
| Si | 1.00694  | -0.40175 | 1.18380  |
| C  | 1.09933  | -0.70117 | 3.02899  |
| H  | 2.06099  | -1.13273 | 3.30770  |
| H  | 0.96083  | 0.22752  | 3.58512  |
| H  | 0.32723  | -1.40644 | 3.33994  |
| H  | -8.39582 | -0.21488 | -0.57265 |
| O  | 1.56210  | -2.85571 | 1.21540  |
| H  | 2.48331  | -2.79670 | 1.46941  |

TS2b-IRC-prod.log Energy: -1080713.2448902

|    |          |          |          |
|----|----------|----------|----------|
| C  | -0.58637 | -0.91574 | -0.06948 |
| H  | -0.52448 | -1.55006 | -0.95856 |
| H  | -0.39433 | 0.10729  | -0.40436 |
| O  | 2.25082  | -0.97331 | 0.45764  |
| O  | -0.24616 | 2.73223  | 0.89682  |
| Si | 3.19367  | -1.45426 | -0.82594 |
| Si | 1.13620  | 3.05675  | 0.14765  |
| C  | 4.10068  | -3.00820 | -0.33821 |
| H  | 3.39750  | -3.81324 | -0.11486 |
| H  | 4.75486  | -3.34525 | -1.14548 |
| H  | 4.71678  | -2.83932 | 0.54732  |
| C  | 4.38363  | -0.05803 | -1.14420 |
| H  | 5.08951  | -0.32584 | -1.93369 |
| H  | 3.85434  | 0.84408  | -1.45520 |
| H  | 4.95609  | 0.17537  | -0.24416 |
| C  | 2.12273  | -1.77803 | -2.31856 |
| H  | 1.42902  | -2.60142 | -2.13661 |
| H  | 1.54241  | -0.89540 | -2.59323 |
| H  | 2.74726  | -2.05022 | -3.17290 |



|    |          |          |          |
|----|----------|----------|----------|
| C  | 1.36017  | 4.90310  | -0.20109 |
| H  | 1.34331  | 5.48412  | 0.72517  |
| H  | 2.31288  | 5.10117  | -0.70037 |
| H  | 0.56213  | 5.28370  | -0.84458 |
| C  | 1.28309  | 2.19789  | -1.53156 |
| H  | 0.42068  | 2.42568  | -2.16425 |
| H  | 2.18176  | 2.51954  | -2.06532 |
| H  | 1.33426  | 1.11351  | -1.41861 |
| C  | 2.66062  | 2.53647  | 1.13930  |
| H  | 2.70131  | 3.06435  | 2.09637  |
| H  | 2.65391  | 1.46508  | 1.34920  |
| H  | 3.58211  | 2.76445  | 0.59564  |
| C  | -1.98721 | -0.99717 | 0.54261  |
| H  | -2.20720 | -2.01800 | 0.86371  |
| H  | -2.04879 | -0.36016 | 1.42818  |
| C  | -3.04135 | -0.55380 | -0.44895 |
| H  | -2.85357 | 0.48063  | -0.76064 |
| H  | -3.01202 | -1.18482 | -1.34533 |
| C  | -5.35096 | -0.21301 | -0.72168 |
| H  | -5.36078 | -0.82761 | -1.62907 |
| H  | -5.18640 | 0.82947  | -1.01673 |
| C  | -6.66980 | -0.34278 | 0.00621  |
| H  | -6.83229 | -1.38414 | 0.29550  |
| H  | -6.65542 | 0.27176  | 0.90982  |
| O  | -4.32544 | -0.64251 | 0.15030  |
| O  | -7.69057 | 0.09616  | -0.88301 |
| Si | 0.79094  | -1.38147 | 1.08874  |
| C  | 0.66833  | -0.55114 | 2.74147  |
| H  | 0.64958  | 0.53332  | 2.61568  |
| H  | -0.24148 | -0.84884 | 3.26521  |
| H  | 1.52364  | -0.80751 | 3.36988  |
| H  | -8.53300 | 0.02064  | -0.43150 |
| O  | 0.68891  | -3.03880 | 1.24631  |
| H  | 1.32307  | -3.43423 | 1.84791  |

TS2b-IRC-react.log Energy: -1080707.3506937

|   |          |          |          |
|---|----------|----------|----------|
| C | -0.67803 | -0.68095 | -0.21348 |
| H | -0.67279 | -1.66615 | -0.68520 |
| H | -0.55553 | 0.05720  | -1.00937 |
| O | 2.36246  | -0.44556 | 0.42341  |

|    |          |          |          |
|----|----------|----------|----------|
| O  | 0.63417  | 1.31623  | 0.94090  |
| Si | 3.23902  | -1.36834 | -0.61761 |
| Si | 1.31512  | 2.43165  | -0.02748 |
| C  | 4.07867  | -2.79083 | 0.26221  |
| H  | 3.35701  | -3.53023 | 0.61241  |
| H  | 4.77890  | -3.29338 | -0.40993 |
| H  | 4.64497  | -2.43292 | 1.12524  |
| C  | 4.56748  | -0.25308 | -1.32235 |
| H  | 5.19697  | -0.80387 | -2.02576 |
| H  | 4.13254  | 0.59682  | -1.85239 |
| H  | 5.21264  | 0.13713  | -0.53195 |
| C  | 2.19645  | -2.02653 | -2.02659 |
| H  | 1.47926  | -2.76996 | -1.67691 |
| H  | 1.64151  | -1.22674 | -2.52132 |
| H  | 2.83792  | -2.49939 | -2.77480 |
| C  | 0.33196  | 4.02482  | 0.14205  |
| H  | 0.34008  | 4.38740  | 1.17291  |
| H  | 0.74830  | 4.81209  | -0.49186 |
| H  | -0.70991 | 3.87508  | -0.15185 |
| C  | 1.29262  | 1.96833  | -1.84911 |
| H  | 0.27029  | 1.90695  | -2.22934 |
| H  | 1.81934  | 2.72643  | -2.43511 |
| H  | 1.77670  | 1.00846  | -2.02855 |
| C  | 3.08827  | 2.82258  | 0.45547  |
| H  | 3.14433  | 3.13458  | 1.50158  |
| H  | 3.73687  | 1.95565  | 0.32696  |
| H  | 3.48423  | 3.63781  | -0.15606 |
| C  | -2.03430 | -0.45982 | 0.46347  |
| H  | -2.19230 | -1.20592 | 1.24762  |
| H  | -2.06040 | 0.51967  | 0.94776  |
| C  | -3.18152 | -0.54372 | -0.52031 |
| H  | -3.06917 | 0.21700  | -1.30245 |
| H  | -3.19588 | -1.52559 | -1.00864 |
| C  | -5.52606 | -0.41836 | -0.70351 |
| H  | -5.56611 | -1.40239 | -1.18450 |
| H  | -5.45279 | 0.34275  | -1.48882 |
| C  | -6.77345 | -0.19462 | 0.12135  |
| H  | -6.84051 | -0.95585 | 0.90267  |
| H  | -6.73128 | 0.78883  | 0.59640  |
| O  | -4.41249 | -0.33994 | 0.16184  |

|    |          |          |          |
|----|----------|----------|----------|
| O  | -7.88949 | -0.27959 | -0.75784 |
| Si | 0.77527  | -0.52169 | 1.00913  |
| C  | 0.56171  | -0.38400 | 2.89361  |
| H  | 1.24992  | 0.35999  | 3.30100  |
| H  | -0.44870 | -0.02403 | 3.11076  |
| H  | 0.70128  | -1.32025 | 3.43577  |
| H  | -8.68720 | -0.16114 | -0.23906 |
| O  | 0.80730  | -2.37111 | 1.09099  |
| H  | 1.45929  | -2.65193 | 1.73478  |

TS2b.log      Energy: -1080703.2678975

|    |          |          |          |
|----|----------|----------|----------|
| C  | -0.71047 | -0.58149 | -0.21026 |
| H  | -0.72725 | -1.46770 | -0.85209 |
| H  | -0.52106 | 0.28061  | -0.84627 |
| O  | 2.23508  | -0.61305 | 0.42600  |
| O  | 0.61143  | 1.62105  | 1.01565  |
| Si | 3.13263  | -1.48589 | -0.65607 |
| Si | 1.49297  | 2.54787  | 0.04632  |
| C  | 3.91136  | -2.95551 | 0.19481  |
| H  | 3.15550  | -3.66550 | 0.53453  |
| H  | 4.58624  | -3.47922 | -0.48658 |
| H  | 4.49340  | -2.63680 | 1.06245  |
| C  | 4.48302  | -0.35817 | -1.28159 |
| H  | 5.10515  | -0.88647 | -2.00836 |
| H  | 4.07198  | 0.52785  | -1.76845 |
| H  | 5.12948  | -0.02803 | -0.46594 |
| C  | 2.08117  | -2.06280 | -2.09010 |
| H  | 1.33665  | -2.79249 | -1.76877 |
| H  | 1.55895  | -1.23034 | -2.56565 |
| H  | 2.71315  | -2.53646 | -2.84555 |
| C  | 0.87538  | 4.33791  | 0.03730  |
| H  | 0.91680  | 4.77821  | 1.03738  |
| H  | 1.48096  | 4.96313  | -0.62543 |
| H  | -0.16070 | 4.39527  | -0.30789 |
| C  | 1.44406  | 2.01600  | -1.76802 |
| H  | 0.43837  | 2.14035  | -2.17936 |
| H  | 2.12443  | 2.62250  | -2.37271 |
| H  | 1.72461  | 0.97000  | -1.89166 |
| C  | 3.31000  | 2.65968  | 0.55515  |
| H  | 3.40222  | 3.14524  | 1.53111  |

|    |          |          |          |
|----|----------|----------|----------|
| H  | 3.76661  | 1.67238  | 0.63059  |
| H  | 3.88984  | 3.24810  | -0.16171 |
| C  | -2.06996 | -0.43482 | 0.47785  |
| H  | -2.25022 | -1.27763 | 1.15099  |
| H  | -2.08418 | 0.47075  | 1.08880  |
| C  | -3.20211 | -0.37129 | -0.52445 |
| H  | -3.07628 | 0.49073  | -1.19067 |
| H  | -3.21167 | -1.27532 | -1.14505 |
| C  | -5.54524 | -0.23550 | -0.71294 |
| H  | -5.56627 | -1.14497 | -1.32422 |
| H  | -5.47845 | 0.62688  | -1.38596 |
| C  | -6.80123 | -0.14605 | 0.12419  |
| H  | -6.85892 | -1.00743 | 0.79443  |
| H  | -6.77909 | 0.76417  | 0.72876  |
| O  | -4.43933 | -0.26112 | 0.16550  |
| O  | -7.91049 | -0.12923 | -0.76716 |
| Si | 0.69586  | -0.81051 | 1.01032  |
| C  | 0.53975  | -0.46524 | 2.84460  |
| H  | 1.27895  | 0.26238  | 3.17554  |
| H  | -0.44653 | -0.05309 | 3.06721  |
| H  | 0.65897  | -1.38045 | 3.42831  |
| H  | -8.71257 | -0.08161 | -0.24383 |
| O  | 0.56733  | -2.54413 | 1.03720  |
| H  | 1.13395  | -2.94012 | 1.70123  |

assist\_TS1h-IRC\_prod.log Energy: -1128999.3170169

|    |          |         |          |
|----|----------|---------|----------|
| Si | -1.65927 | 0.00946 | -0.34411 |
| O  | -1.59163 | 0.62643 | 1.21438  |
| O  | 2.39318  | 1.99548 | 0.11228  |
| H  | -1.92359 | 0.04274 | 1.90168  |
| Si | 2.11974  | 3.61755 | -0.19201 |
| C  | 1.95453  | 3.80973 | -2.03856 |
| H  | 1.87148  | 4.86565 | -2.30576 |
| H  | 2.82960  | 3.40373 | -2.55083 |
| H  | 1.06975  | 3.29397 | -2.41582 |
| C  | 3.57341  | 4.61639 | 0.41700  |
| H  | 4.49732  | 4.30580 | -0.07556 |
| H  | 3.42360  | 5.67871 | 0.21035  |
| H  | 3.70699  | 4.49818 | 1.49438  |
| C  | 0.56204  | 4.15416 | 0.68691  |

|    |          |          |          |
|----|----------|----------|----------|
| H  | 0.69088  | 4.12946  | 1.77103  |
| H  | 0.30717  | 5.17905  | 0.40663  |
| H  | -0.28299 | 3.51369  | 0.42862  |
| C  | -0.90514 | 1.30394  | -1.42221 |
| H  | -1.44437 | 2.24937  | -1.35155 |
| H  | 0.13205  | 1.47125  | -1.13115 |
| H  | -0.91462 | 0.98006  | -2.46468 |
| C  | -0.73196 | -1.60414 | -0.39450 |
| H  | -1.11393 | -2.24596 | 0.40538  |
| H  | -0.96842 | -2.11102 | -1.33471 |
| O  | -3.22692 | -0.22187 | -0.77526 |
| Si | -4.55439 | -0.89474 | -0.01770 |
| C  | 0.78413  | -1.43528 | -0.25530 |
| H  | 1.17461  | -0.84337 | -1.08607 |
| H  | 1.02538  | -0.89368 | 0.66216  |
| C  | 1.49214  | -2.77256 | -0.23280 |
| H  | 1.27412  | -3.33506 | -1.14849 |
| H  | 1.14759  | -3.37167 | 0.61848  |
| O  | 2.89184  | -2.56081 | -0.12800 |
| C  | -5.24620 | 0.35616  | 1.17700  |
| H  | -4.51677 | 0.59505  | 1.95372  |
| H  | -5.51351 | 1.28243  | 0.66467  |
| H  | -6.14345 | -0.03207 | 1.66427  |
| C  | -5.78077 | -1.30064 | -1.35510 |
| H  | -5.36637 | -2.02317 | -2.06079 |
| H  | -6.68783 | -1.73057 | -0.92473 |
| H  | -6.06334 | -0.40427 | -1.91065 |
| C  | -4.02379 | -2.42918 | 0.90034  |
| H  | -4.88898 | -2.89824 | 1.37479  |
| H  | -3.57080 | -3.15901 | 0.22690  |
| H  | -3.30192 | -2.19405 | 1.68595  |
| C  | 3.61493  | -3.77380 | -0.07806 |
| H  | 3.30703  | -4.36420 | 0.79235  |
| H  | 3.42419  | -4.36777 | -0.97911 |
| C  | 5.08535  | -3.43545 | 0.01936  |
| H  | 5.26716  | -2.83469 | 0.91406  |
| H  | 5.39088  | -2.85719 | -0.85623 |
| O  | 5.80233  | -4.66297 | 0.08562  |
| H  | 6.73672  | -4.45923 | 0.15551  |
| H  | 0.06730  | 1.01136  | 1.94034  |

|   |         |         |         |
|---|---------|---------|---------|
| O | 0.93730 | 1.17073 | 2.34609 |
| H | 0.84302 | 2.00738 | 2.80834 |
| H | 1.90813 | 1.65374 | 0.88459 |

assist\_TS1h-IRC\_react.log Energy: -1129007.7952785

|    |          |          |          |
|----|----------|----------|----------|
| Si | 0.94451  | -0.38959 | 1.08247  |
| O  | -1.80589 | 3.17154  | -1.00882 |
| O  | 1.06636  | 0.92512  | 0.08222  |
| H  | -1.06420 | 3.60841  | -0.58437 |
| Si | 2.10405  | 2.23956  | 0.05984  |
| C  | 1.53815  | 3.45362  | 1.35423  |
| H  | 2.12605  | 4.37271  | 1.30021  |
| H  | 0.48773  | 3.71577  | 1.20960  |
| H  | 1.65040  | 3.04059  | 2.35833  |
| C  | 1.96233  | 2.96161  | -1.64831 |
| H  | 0.94730  | 3.31295  | -1.84400 |
| H  | 2.64055  | 3.81007  | -1.76218 |
| H  | 2.21955  | 2.21814  | -2.40552 |
| C  | 3.84270  | 1.66462  | 0.40529  |
| H  | 4.19308  | 0.98014  | -0.36905 |
| H  | 4.51912  | 2.52240  | 0.42796  |
| H  | 3.91294  | 1.15672  | 1.36905  |
| C  | 0.91637  | 0.15501  | 2.85295  |
| H  | 1.86564  | 0.61532  | 3.13391  |
| H  | 0.12037  | 0.88183  | 3.02287  |
| H  | 0.74560  | -0.69806 | 3.51256  |
| C  | -0.60093 | -1.27565 | 0.54826  |
| H  | -0.49808 | -1.50114 | -0.51919 |
| H  | -0.65474 | -2.23976 | 1.06159  |
| O  | 2.26114  | -1.35262 | 0.87487  |
| Si | 2.86804  | -2.16222 | -0.45359 |
| C  | -1.88168 | -0.47227 | 0.79414  |
| H  | -2.06240 | -0.37581 | 1.86705  |
| H  | -1.78195 | 0.53957  | 0.39313  |
| C  | -3.07957 | -1.13158 | 0.14628  |
| H  | -3.20449 | -2.15408 | 0.52238  |
| H  | -2.93601 | -1.19033 | -0.94006 |
| O  | -4.24576 | -0.37510 | 0.43009  |
| C  | 2.47342  | -1.22194 | -2.01599 |
| H  | 1.39605  | -1.11669 | -2.15715 |

|   |          |          |          |
|---|----------|----------|----------|
| H | 2.91559  | -0.22468 | -2.01100 |
| H | 2.87161  | -1.76357 | -2.87761 |
| C | 4.70720  | -2.28347 | -0.20045 |
| H | 4.94204  | -2.82651 | 0.71718  |
| H | 5.17849  | -2.80869 | -1.03404 |
| H | 5.15218  | -1.28868 | -0.13085 |
| C | 2.07329  | -3.84664 | -0.51387 |
| H | 2.47139  | -4.43308 | -1.34498 |
| H | 2.25475  | -4.40110 | 0.40894  |
| H | 0.99338  | -3.75757 | -0.65079 |
| C | -5.39898 | -0.92222 | -0.17607 |
| H | -5.28268 | -0.94098 | -1.26559 |
| H | -5.55823 | -1.95025 | 0.16855  |
| C | -6.58047 | -0.05909 | 0.20486  |
| H | -6.41465 | 0.96596  | -0.13624 |
| H | -6.69645 | -0.04988 | 1.29152  |
| O | -7.73291 | -0.61510 | -0.41794 |
| H | -8.49116 | -0.08220 | -0.17192 |
| H | -1.41998 | 2.37975  | -1.42262 |
| O | -0.65498 | 0.86666  | -2.18636 |
| H | -1.29348 | 0.16841  | -2.01870 |
| H | -0.01229 | 0.78974  | -1.46150 |

assist\_TS1h.log      Energy: -1128960.2935961

|    |          |          |          |
|----|----------|----------|----------|
| Si | -0.72296 | -0.30596 | -0.55706 |
| O  | -0.74105 | -0.84223 | 1.32185  |
| O  | -0.68909 | 1.32363  | 0.20047  |
| H  | -0.33836 | -1.70555 | 1.41853  |
| Si | -1.60310 | 2.73500  | -0.10433 |
| C  | -0.83167 | 3.72089  | -1.47845 |
| H  | -1.23653 | 4.73568  | -1.45683 |
| H  | 0.24918  | 3.78998  | -1.34114 |
| H  | -1.02768 | 3.29895  | -2.46287 |
| C  | -1.49875 | 3.68898  | 1.49063  |
| H  | -0.46707 | 3.94421  | 1.73930  |
| H  | -2.05988 | 4.62089  | 1.39302  |
| H  | -1.92553 | 3.12458  | 2.32180  |
| C  | -3.36247 | 2.24829  | -0.45002 |
| H  | -3.79031 | 1.74094  | 0.41602  |
| H  | -3.95428 | 3.14735  | -0.63858 |

|    |          |          |          |
|----|----------|----------|----------|
| H  | -3.45851 | 1.59396  | -1.31594 |
| C  | -0.74814 | 0.44039  | -2.32552 |
| H  | -1.62774 | 1.04419  | -2.55702 |
| H  | 0.13941  | 1.04918  | -2.52051 |
| H  | -0.73810 | -0.38961 | -3.03790 |
| C  | 0.93643  | -1.21112 | -0.74015 |
| H  | 0.93266  | -2.16081 | -0.19727 |
| H  | 1.07351  | -1.45723 | -1.79653 |
| O  | -2.16889 | -1.11666 | -0.76463 |
| Si | -3.19967 | -2.06864 | 0.11597  |
| C  | 2.12214  | -0.36260 | -0.26932 |
| H  | 2.14462  | 0.58810  | -0.80919 |
| H  | 2.02105  | -0.12555 | 0.79173  |
| C  | 3.43976  | -1.07587 | -0.48397 |
| H  | 3.58094  | -1.30703 | -1.54650 |
| H  | 3.45289  | -2.02259 | 0.06935  |
| O  | 4.50606  | -0.25179 | -0.03447 |
| C  | -4.11156 | -1.07040 | 1.40388  |
| H  | -3.42660 | -0.55821 | 2.07992  |
| H  | -4.75296 | -0.32371 | 0.93153  |
| H  | -4.75086 | -1.72653 | 2.00024  |
| C  | -4.43839 | -2.71004 | -1.12884 |
| H  | -3.95123 | -3.32847 | -1.88609 |
| H  | -5.20071 | -3.31941 | -0.63773 |
| H  | -4.94268 | -1.88617 | -1.63857 |
| C  | -2.33064 | -3.53753 | 0.88431  |
| H  | -3.05092 | -4.34116 | 1.05645  |
| H  | -1.55867 | -3.92351 | 0.21456  |
| H  | -1.86510 | -3.29790 | 1.84045  |
| C  | 5.76440  | -0.87568 | -0.18834 |
| H  | 5.80253  | -1.80282 | 0.39494  |
| H  | 5.93836  | -1.12688 | -1.24079 |
| C  | 6.82585  | 0.08533  | 0.29749  |
| H  | 6.63908  | 0.34418  | 1.34288  |
| H  | 6.79709  | 1.00093  | -0.29840 |
| O  | 8.08472  | -0.56385 | 0.15886  |
| H  | 8.76839  | 0.04885  | 0.43565  |
| H  | -0.13970 | 0.06681  | 2.10797  |
| O  | 0.25796  | 1.05085  | 2.37555  |
| H  | -0.31635 | 1.42705  | 3.04934  |



H -0.19920 1.34805 1.28287

assist\_TS2h-IRC-prod.log Energy: -872523.1261022

|    |          |          |          |
|----|----------|----------|----------|
| Si | -3.16282 | -0.95071 | -0.22167 |
| O  | -3.19430 | -1.10852 | 1.44358  |
| O  | -0.37232 | 2.68920  | 0.97658  |
| H  | -3.00927 | -1.98666 | 1.78505  |
| Si | 0.76946  | 2.54455  | -0.23353 |
| C  | 0.01346  | 1.78286  | -1.76219 |
| H  | 0.76403  | 1.70746  | -2.55297 |
| H  | -0.37002 | 0.78067  | -1.57002 |
| H  | -0.81024 | 2.39380  | -2.13708 |
| C  | 2.19503  | 1.49986  | 0.36035  |
| H  | 2.93300  | 1.36854  | -0.43444 |
| H  | 2.69415  | 1.96727  | 1.21173  |
| H  | 1.85363  | 0.50996  | 0.66652  |
| C  | 1.31704  | 4.28592  | -0.60355 |
| H  | 1.77293  | 4.75179  | 0.27221  |
| H  | 2.05431  | 4.28950  | -1.40948 |
| H  | 0.47385  | 4.90401  | -0.91885 |
| C  | -3.27637 | 0.87326  | -0.50111 |
| H  | -2.44259 | 1.39106  | -0.02508 |
| H  | -3.25611 | 1.10143  | -1.56769 |
| H  | -4.20441 | 1.26990  | -0.08407 |
| C  | -1.63070 | -1.74966 | -0.90611 |
| H  | -1.81962 | -2.80973 | -1.09280 |
| H  | -1.43832 | -1.29791 | -1.88496 |
| O  | -4.44040 | -1.75416 | -0.91110 |
| C  | -0.40776 | -1.58646 | 0.00283  |
| H  | -0.33269 | -0.56334 | 0.37985  |
| H  | -0.50800 | -2.23437 | 0.87577  |
| C  | 0.87550  | -1.91950 | -0.72603 |
| H  | 1.05291  | -1.18085 | -1.51698 |
| H  | 0.81066  | -2.90730 | -1.19772 |
| O  | 1.95517  | -1.89815 | 0.19350  |
| H  | -5.30447 | -1.35690 | -0.78317 |
| C  | 3.21261  | -1.89530 | -0.44890 |
| H  | 3.27156  | -1.06175 | -1.15805 |
| H  | 3.36336  | -2.82833 | -1.00392 |
| C  | 4.27713  | -1.73945 | 0.61310  |

|   |          |          |          |
|---|----------|----------|----------|
| H | 4.21208  | -2.56259 | 1.32930  |
| H | 4.12495  | -0.79831 | 1.14810  |
| O | 5.53872  | -1.74515 | -0.04543 |
| H | 6.22157  | -1.61660 | 0.61528  |
| H | -1.88805 | 0.00465  | 2.23608  |
| O | -1.21670 | 0.58607  | 2.62965  |
| H | -0.63681 | 1.87915  | 1.44557  |
| H | -1.69262 | 1.10812  | 3.28002  |

assist\_TS2h-IRC-react.log Energy: -872495.1339339

|    |          |          |          |
|----|----------|----------|----------|
| Si | -1.91040 | -1.35978 | -0.22086 |
| O  | -2.05757 | -1.74293 | 1.62503  |
| O  | -1.82263 | 0.29412  | 0.41767  |
| H  | -1.86914 | -2.67169 | 1.79737  |
| Si | -1.80934 | 1.81371  | -0.21598 |
| C  | -0.91068 | 1.89052  | -1.85521 |
| H  | -0.92099 | 2.91774  | -2.22859 |
| H  | 0.13184  | 1.58302  | -1.74950 |
| H  | -1.37860 | 1.25683  | -2.61068 |
| C  | -0.90787 | 2.90448  | 1.00869  |
| H  | -0.87306 | 3.93444  | 0.64612  |
| H  | -1.40644 | 2.91043  | 1.98085  |
| H  | 0.12119  | 2.56780  | 1.15574  |
| C  | -3.54976 | 2.46518  | -0.43070 |
| H  | -4.11780 | 2.36816  | 0.49723  |
| H  | -3.52337 | 3.52479  | -0.69714 |
| H  | -4.09119 | 1.93602  | -1.21611 |
| C  | -3.41911 | -0.99241 | -1.29286 |
| H  | -4.25953 | -0.70027 | -0.65787 |
| H  | -3.22020 | -0.14991 | -1.95757 |
| H  | -3.73050 | -1.83892 | -1.90444 |
| C  | -0.15969 | -1.39248 | -0.92390 |
| H  | 0.08886  | -2.41157 | -1.22379 |
| H  | -0.20046 | -0.80594 | -1.84880 |
| O  | -2.09917 | -3.12863 | -0.33237 |
| C  | 0.95475  | -0.83577 | -0.03640 |
| H  | 0.71910  | 0.17953  | 0.28504  |
| H  | 1.05774  | -1.44023 | 0.86844  |
| C  | 2.27962  | -0.81251 | -0.76706 |
| H  | 2.20323  | -0.18625 | -1.66467 |

|   |          |          |          |
|---|----------|----------|----------|
| H | 2.56363  | -1.82206 | -1.08736 |
| O | 3.28537  | -0.28899 | 0.08897  |
| H | -3.02069 | -3.39099 | -0.34937 |
| C | 4.54501  | -0.21994 | -0.54697 |
| H | 4.48961  | 0.42504  | -1.43135 |
| H | 4.86292  | -1.21738 | -0.87139 |
| C | 5.53929  | 0.34433  | 0.44256  |
| H | 5.60013  | -0.30662 | 1.31830  |
| H | 5.21488  | 1.33614  | 0.76777  |
| O | 6.79877  | 0.41918  | -0.21589 |
| H | 7.44201  | 0.75982  | 0.40818  |
| H | -1.56601 | -1.15754 | 2.25786  |
| O | -0.66019 | 0.05964  | 2.95950  |
| H | -0.82287 | 0.49902  | 2.10829  |
| H | -1.20392 | 0.53805  | 3.59118  |

assist\_TS2h.log      Energy: -872489.1591778

|    |          |          |          |
|----|----------|----------|----------|
| Si | -1.92251 | -1.41523 | -0.19646 |
| O  | -2.11097 | -1.80218 | 1.51609  |
| O  | -1.76107 | 0.36583  | 0.45837  |
| H  | -2.01080 | -2.74598 | 1.65917  |
| Si | -1.71090 | 1.87843  | -0.19991 |
| C  | -0.81712 | 1.91203  | -1.84233 |
| H  | -0.81301 | 2.93372  | -2.23094 |
| H  | 0.22043  | 1.58793  | -1.73917 |
| H  | -1.30254 | 1.27588  | -2.58468 |
| C  | -0.78104 | 2.95158  | 1.01921  |
| H  | -0.70189 | 3.97673  | 0.65042  |
| H  | -1.28772 | 2.98290  | 1.98663  |
| H  | 0.23105  | 2.57268  | 1.17928  |
| C  | -3.43317 | 2.57100  | -0.43203 |
| H  | -4.01318 | 2.49387  | 0.49026  |
| H  | -3.37856 | 3.62766  | -0.70601 |
| H  | -3.97788 | 2.04879  | -1.21990 |
| C  | -3.45241 | -0.90047 | -1.16973 |
| H  | -4.17395 | -0.41001 | -0.51440 |
| H  | -3.17435 | -0.17276 | -1.93600 |
| H  | -3.94619 | -1.73339 | -1.67028 |
| C  | -0.16823 | -1.36721 | -0.90118 |
| H  | 0.09089  | -2.36902 | -1.24770 |

|   |          |          |          |
|---|----------|----------|----------|
| H | -0.21749 | -0.74259 | -1.79932 |
| O | -2.08032 | -3.16001 | -0.54965 |
| C | 0.95018  | -0.84722 | 0.00301  |
| H | 0.72080  | 0.15549  | 0.36363  |
| H | 1.05504  | -1.48669 | 0.88342  |
| C | 2.27241  | -0.80305 | -0.73172 |
| H | 2.19528  | -0.14501 | -1.60631 |
| H | 2.55149  | -1.80155 | -1.08889 |
| O | 3.28436  | -0.31428 | 0.13782  |
| H | -2.99631 | -3.44132 | -0.53631 |
| C | 4.54228  | -0.23251 | -0.49994 |
| H | 4.48861  | 0.44288  | -1.36148 |
| H | 4.85166  | -1.22048 | -0.85965 |
| C | 5.54448  | 0.28972  | 0.50459  |
| H | 5.60400  | -0.39186 | 1.35679  |
| H | 5.22879  | 1.27194  | 0.86559  |
| O | 6.80191  | 0.37818  | -0.15617 |
| H | 7.45273  | 0.68071  | 0.47957  |
| H | -1.54793 | -1.02535 | 2.36637  |
| O | -1.05200 | -0.08931 | 2.76743  |
| H | -1.25304 | 0.36691  | 1.85199  |
| H | -1.62772 | 0.31411  | 3.42664  |

TS1h-IRC-prod.log Energy: -1081024.1755810

|    |          |          |          |
|----|----------|----------|----------|
| Si | -0.11177 | 0.23831  | 0.62192  |
| O  | -0.60168 | -0.70881 | -0.66606 |
| O  | -2.39031 | -2.80775 | -0.16204 |
| H  | -0.64097 | -0.29441 | -1.53057 |
| Si | -3.91978 | -2.12643 | -0.19722 |
| H  | -1.69871 | -2.15375 | -0.35335 |
| C  | -5.09726 | -3.50806 | 0.21356  |
| H  | -6.12764 | -3.14584 | 0.19962  |
| H  | -5.01790 | -4.32201 | -0.50970 |
| H  | -4.89751 | -3.91303 | 1.20758  |
| C  | -4.24809 | -1.45250 | -1.90683 |
| H  | -5.18686 | -0.89508 | -1.93706 |
| H  | -3.44734 | -0.77939 | -2.21859 |
| H  | -4.31130 | -2.26268 | -2.63640 |
| C  | -4.03431 | -0.76194 | 1.07081  |
| H  | -3.27032 | -0.00077 | 0.90702  |

|    |          |          |          |
|----|----------|----------|----------|
| H  | -5.01039 | -0.27359 | 1.01782  |
| H  | -3.90898 | -1.15637 | 2.08134  |
| C  | -0.25869 | -0.86805 | 2.09540  |
| H  | -1.30067 | -1.14247 | 2.26805  |
| H  | 0.31870  | -1.78325 | 1.95613  |
| H  | 0.11376  | -0.36562 | 2.98999  |
| C  | 1.61563  | 0.86039  | 0.31798  |
| H  | 1.62134  | 1.41564  | -0.62486 |
| H  | 1.85290  | 1.58727  | 1.10112  |
| O  | -1.12990 | 1.51198  | 0.81090  |
| Si | -1.74009 | 2.73713  | -0.14245 |
| C  | 2.67789  | -0.24136 | 0.28387  |
| H  | 2.68323  | -0.79303 | 1.22693  |
| H  | 2.45146  | -0.96052 | -0.50671 |
| C  | 4.05872  | 0.33059  | 0.04428  |
| H  | 4.32450  | 1.03080  | 0.84517  |
| H  | 4.08312  | 0.88121  | -0.90363 |
| O  | 5.00608  | -0.72554 | 0.00347  |
| C  | -2.89227 | 2.00234  | -1.40938 |
| H  | -2.36660 | 1.29722  | -2.05634 |
| H  | -3.72437 | 1.47852  | -0.93636 |
| H  | -3.30593 | 2.79103  | -2.04257 |
| C  | -2.65451 | 3.87990  | 1.00523  |
| H  | -1.98290 | 4.30609  | 1.75299  |
| H  | -3.10628 | 4.70331  | 0.44787  |
| H  | -3.45249 | 3.34753  | 1.52688  |
| C  | -0.33363 | 3.61600  | -0.99444 |
| H  | 0.41496  | 3.95676  | -0.27673 |
| H  | 0.15880  | 2.96417  | -1.71889 |
| H  | -0.70869 | 4.48963  | -1.53282 |
| C  | 6.32174  | -0.25691 | -0.21204 |
| H  | 6.37995  | 0.29071  | -1.15948 |
| H  | 6.62036  | 0.42225  | 0.59453  |
| C  | 7.24254  | -1.45558 | -0.24880 |
| H  | 6.94219  | -2.12713 | -1.05698 |
| H  | 7.17971  | -1.99934 | 0.69724  |
| O  | 8.56384  | -0.97256 | -0.46330 |
| H  | 9.15302  | -1.72754 | -0.51215 |

TS1h-IRC-react.log Energy: -1081029.6239885

|    |          |          |          |
|----|----------|----------|----------|
| Si | -0.92551 | -0.22819 | -1.07681 |
| O  | 0.54967  | 0.22202  | 2.45856  |
| O  | -1.05106 | 0.89794  | 0.13115  |
| H  | 1.20701  | -0.39659 | 2.13063  |
| Si | -1.59903 | 2.47742  | 0.21621  |
| H  | 0.00599  | 0.42919  | 1.68350  |
| C  | -0.40424 | 3.56593  | -0.70954 |
| H  | -0.64635 | 4.61932  | -0.55095 |
| H  | 0.61808  | 3.39837  | -0.36425 |
| H  | -0.43871 | 3.37101  | -1.78272 |
| C  | -1.62974 | 2.89829  | 2.02786  |
| H  | -2.05158 | 3.89402  | 2.18090  |
| H  | -2.24303 | 2.18288  | 2.57973  |
| H  | -0.62512 | 2.88915  | 2.45417  |
| C  | -3.30718 | 2.59705  | -0.51821 |
| H  | -4.02826 | 2.01813  | 0.06004  |
| H  | -3.63520 | 3.63941  | -0.51857 |
| H  | -3.33018 | 2.24133  | -1.54975 |
| C  | -0.90757 | 0.56433  | -2.75250 |
| H  | -1.81717 | 1.13331  | -2.94904 |
| H  | -0.05319 | 1.23556  | -2.85318 |
| H  | -0.81988 | -0.20775 | -3.51999 |
| C  | 0.64585  | -1.16323 | -0.73353 |
| H  | 0.54844  | -1.63913 | 0.24663  |
| H  | 0.74571  | -1.97516 | -1.45945 |
| O  | -2.22733 | -1.22992 | -0.99559 |
| Si | -3.03106 | -1.95370 | 0.27678  |
| C  | 1.89219  | -0.27261 | -0.75987 |
| H  | 2.08153  | 0.08138  | -1.77573 |
| H  | 1.74146  | 0.61171  | -0.13527 |
| C  | 3.10965  | -1.01750 | -0.25784 |
| H  | 3.29248  | -1.90879 | -0.86984 |
| H  | 2.94862  | -1.34893 | 0.77582  |
| O  | 4.24311  | -0.16508 | -0.31028 |
| C  | -4.07264 | -0.68405 | 1.15696  |
| H  | -3.45041 | 0.09187  | 1.60615  |
| H  | -4.77850 | -0.20810 | 0.47419  |
| H  | -4.64599 | -1.16081 | 1.95572  |
| C  | -4.10086 | -3.27864 | -0.47402 |
| H  | -3.49550 | -4.02153 | -0.99717 |

|   |          |          |          |
|---|----------|----------|----------|
| H | -4.67241 | -3.79400 | 0.30099  |
| H | -4.80886 | -2.85223 | -1.18751 |
| C | -1.79750 | -2.69100 | 1.46522  |
| H | -1.14236 | -3.40793 | 0.96695  |
| H | -1.17643 | -1.91877 | 1.92385  |
| H | -2.32454 | -3.21507 | 2.26620  |
| C | 5.41455  | -0.80740 | 0.15072  |
| H | 5.28680  | -1.13010 | 1.19022  |
| H | 5.62691  | -1.69324 | -0.45845 |
| C | 6.55868  | 0.17594  | 0.04991  |
| H | 6.34591  | 1.05582  | 0.66236  |
| H | 6.68082  | 0.49542  | -0.98807 |
| O | 7.73037  | -0.48652 | 0.51213  |
| H | 8.46717  | 0.12245  | 0.43665  |

TS1h.log      Energy: -1080983.9841580

|    |          |          |          |
|----|----------|----------|----------|
| Si | 0.72958  | -0.20974 | 0.54075  |
| O  | 0.81091  | -0.46985 | -1.46834 |
| O  | 0.75009  | 1.44153  | -0.28269 |
| H  | -0.00949 | -0.84152 | -1.79521 |
| Si | 1.76478  | 2.82827  | -0.15629 |
| H  | 0.74451  | 0.89951  | -1.19665 |
| C  | 1.06416  | 3.90956  | 1.17607  |
| H  | 1.58321  | 4.87093  | 1.17155  |
| H  | 0.00350  | 4.09946  | 1.00314  |
| H  | 1.18142  | 3.46783  | 2.16520  |
| C  | 1.64438  | 3.60902  | -1.83470 |
| H  | 2.26545  | 4.50592  | -1.88060 |
| H  | 1.98831  | 2.92001  | -2.60851 |
| H  | 0.61615  | 3.89620  | -2.06077 |
| C  | 3.48446  | 2.23309  | 0.20865  |
| H  | 3.82655  | 1.55254  | -0.57345 |
| H  | 4.17183  | 3.08139  | 0.24353  |
| H  | 3.53898  | 1.71379  | 1.16616  |
| C  | 0.72093  | 0.57374  | 2.26813  |
| H  | 1.62137  | 1.15461  | 2.47862  |
| H  | -0.14377 | 1.22686  | 2.41066  |
| H  | 0.66448  | -0.22054 | 3.01696  |
| C  | -0.91364 | -1.12616 | 0.56983  |
| H  | -0.87885 | -1.99550 | -0.09141 |

|    |          |          |          |
|----|----------|----------|----------|
| H  | -1.05677 | -1.50398 | 1.58648  |
| O  | 2.14754  | -1.04351 | 0.69532  |
| Si | 2.99278  | -2.18937 | -0.16300 |
| C  | -2.10011 | -0.23183 | 0.19305  |
| H  | -2.13822 | 0.64296  | 0.84733  |
| H  | -1.98716 | 0.13842  | -0.82905 |
| C  | -3.41242 | -0.97837 | 0.29952  |
| H  | -3.56501 | -1.33448 | 1.32523  |
| H  | -3.40700 | -1.85322 | -0.36157 |
| O  | -4.47959 | -0.11589 | -0.06578 |
| C  | 4.02472  | -1.38096 | -1.49012 |
| H  | 3.41061  | -0.85763 | -2.22252 |
| H  | 4.71936  | -0.66336 | -1.04794 |
| H  | 4.61669  | -2.13436 | -2.01590 |
| C  | 4.13612  | -2.98015 | 1.08465  |
| H  | 3.57154  | -3.46663 | 1.88298  |
| H  | 4.76319  | -3.73691 | 0.60743  |
| H  | 4.79437  | -2.23675 | 1.53942  |
| C  | 1.85885  | -3.50281 | -0.85175 |
| H  | 1.20609  | -3.89258 | -0.06732 |
| H  | 1.23476  | -3.12512 | -1.66095 |
| H  | 2.44991  | -4.33786 | -1.23612 |
| C  | -5.73648 | -0.75582 | 0.02214  |
| H  | -5.76760 | -1.62544 | -0.64409 |
| H  | -5.91504 | -1.10319 | 1.04607  |
| C  | -6.79908 | 0.24241  | -0.37854 |
| H  | -6.61801 | 0.58548  | -1.40034 |
| H  | -6.76568 | 1.10639  | 0.28996  |
| O  | -8.05776 | -0.41519 | -0.28578 |
| H  | -8.74051 | 0.21133  | -0.53222 |

TS2h-IRC-prod.log Energy: -824544.2727721

|    |          |          |          |
|----|----------|----------|----------|
| Si | -1.97507 | -2.16250 | 0.02361  |
| O  | -2.51660 | -1.09000 | 1.16496  |
| O  | -1.40860 | 1.46565  | 1.32391  |
| H  | -2.11137 | -0.20484 | 1.16465  |
| Si | -1.62512 | 2.50670  | 0.01047  |
| H  | -1.84146 | 1.75192  | 2.13159  |
| C  | -0.26853 | 2.08541  | -1.18681 |
| H  | -0.29443 | 2.77931  | -2.03026 |



|   |          |          |          |
|---|----------|----------|----------|
| H | 0.71352  | 2.16063  | -0.71663 |
| H | -0.38218 | 1.07579  | -1.58263 |
| C | -1.49167 | 4.25948  | 0.62301  |
| H | -1.64569 | 4.96314  | -0.19798 |
| H | -2.24553 | 4.46561  | 1.38592  |
| H | -0.50770 | 4.45251  | 1.05428  |
| C | -3.30346 | 2.18684  | -0.73097 |
| H | -4.09550 | 2.40816  | -0.01247 |
| H | -3.46283 | 2.81367  | -1.61131 |
| H | -3.40293 | 1.14356  | -1.03647 |
| C | -2.38190 | -1.55149 | -1.68140 |
| H | -3.46037 | -1.44112 | -1.81113 |
| H | -1.91997 | -0.57996 | -1.86603 |
| H | -2.01559 | -2.24825 | -2.43799 |
| C | -0.16013 | -2.50357 | 0.24288  |
| H | 0.00350  | -2.85159 | 1.26737  |
| H | 0.12204  | -3.32967 | -0.41657 |
| O | -2.75649 | -3.59256 | 0.34180  |
| C | 0.71641  | -1.28159 | -0.04652 |
| H | 0.59177  | -0.96906 | -1.08569 |
| H | 0.41447  | -0.43729 | 0.57787  |
| C | 2.18125  | -1.56718 | 0.20188  |
| H | 2.52282  | -2.39417 | -0.43199 |
| H | 2.34185  | -1.85687 | 1.24707  |
| O | 2.93756  | -0.40147 | -0.08884 |
| H | -3.67943 | -3.62716 | 0.08351  |
| C | 4.32057  | -0.59001 | 0.12995  |
| H | 4.69955  | -1.39878 | -0.50514 |
| H | 4.50682  | -0.86037 | 1.17548  |
| C | 5.02492  | 0.70561  | -0.20402 |
| H | 4.64512  | 1.50718  | 0.43446  |
| H | 4.83440  | 0.97163  | -1.24691 |
| O | 6.41633  | 0.50532  | 0.01662  |
| H | 6.86938  | 1.33057  | -0.16587 |

TS2h-IRC-react.log Energy: -824548.1452586

|    |         |          |          |
|----|---------|----------|----------|
| Si | 1.67106 | 1.54302  | -0.11572 |
| O  | 0.97922 | -0.35442 | 3.06831  |
| O  | 2.10594 | 0.04182  | 0.42956  |
| H  | 1.24375 | -1.24237 | 3.31870  |

|    |          |          |          |
|----|----------|----------|----------|
| Si | 2.49913  | -1.42475 | -0.28014 |
| H  | 1.35500  | -0.23242 | 2.18383  |
| C  | 1.06531  | -2.02199 | -1.30875 |
| H  | 1.31860  | -2.97636 | -1.77697 |
| H  | 0.17610  | -2.17359 | -0.69467 |
| H  | 0.81708  | -1.31568 | -2.10292 |
| C  | 2.82640  | -2.59583 | 1.12857  |
| H  | 3.18572  | -3.55388 | 0.74637  |
| H  | 3.58426  | -2.19683 | 1.80544  |
| H  | 1.91770  | -2.78552 | 1.70306  |
| C  | 4.02066  | -1.21148 | -1.33342 |
| H  | 4.82370  | -0.72950 | -0.77246 |
| H  | 4.38096  | -2.18804 | -1.66546 |
| H  | 3.81429  | -0.61210 | -2.22115 |
| C  | 1.98738  | 1.69849  | -1.93692 |
| H  | 3.05442  | 1.64022  | -2.15833 |
| H  | 1.47790  | 0.91711  | -2.50304 |
| H  | 1.62101  | 2.66426  | -2.29059 |
| C  | -0.09864 | 1.83711  | 0.36100  |
| H  | -0.15429 | 1.94423  | 1.44839  |
| H  | -0.40997 | 2.79771  | -0.06078 |
| O  | 2.55310  | 2.67379  | 0.72144  |
| C  | -1.04190 | 0.72454  | -0.10402 |
| H  | -0.95336 | 0.57129  | -1.18287 |
| H  | -0.76936 | -0.21806 | 0.37514  |
| C  | -2.48344 | 1.04407  | 0.22680  |
| H  | -2.79360 | 1.96881  | -0.27401 |
| H  | -2.60215 | 1.19164  | 1.30685  |
| O  | -3.31157 | -0.02693 | -0.19981 |
| H  | 3.47338  | 2.75830  | 0.46400  |
| C  | -4.67870 | 0.21670  | 0.06147  |
| H  | -5.01265 | 1.11564  | -0.46904 |
| H  | -4.83889 | 0.37339  | 1.13418  |
| C  | -5.46504 | -0.98549 | -0.41023 |
| H  | -5.13705 | -1.87711 | 0.12999  |
| H  | -5.29385 | -1.14285 | -1.47822 |
| O  | -6.84001 | -0.72240 | -0.15592 |
| H  | -7.34687 | -1.48545 | -0.43905 |

TS2h.log      Energy: -824507.2706409

|    |          |          |          |
|----|----------|----------|----------|
| Si | 1.71198  | -1.54271 | 0.04688  |
| O  | 1.60478  | -1.45540 | -1.96778 |
| O  | 2.11086  | 0.14307  | -0.48892 |
| H  | 0.68855  | -1.47052 | -2.25034 |
| Si | 2.31833  | 1.77659  | -0.00938 |
| H  | 1.90824  | -0.20189 | -1.48861 |
| C  | 0.77437  | 2.33717  | 0.85164  |
| H  | 0.88843  | 3.38107  | 1.15411  |
| H  | -0.09366 | 2.26794  | 0.19479  |
| H  | 0.58002  | 1.74760  | 1.74861  |
| C  | 2.58531  | 2.66036  | -1.61819 |
| H  | 2.71380  | 3.73079  | -1.44575 |
| H  | 3.47757  | 2.28881  | -2.12504 |
| H  | 1.72979  | 2.52494  | -2.28254 |
| C  | 3.80073  | 1.86313  | 1.10150  |
| H  | 4.65680  | 1.35262  | 0.65754  |
| H  | 4.07430  | 2.90971  | 1.25570  |
| H  | 3.59992  | 1.42187  | 2.07779  |
| C  | 2.11656  | -1.18761 | 1.86712  |
| H  | 3.15674  | -0.88981 | 2.01602  |
| H  | 1.47816  | -0.39653 | 2.26938  |
| H  | 1.93707  | -2.08359 | 2.46764  |
| C  | -0.11429 | -1.97775 | 0.13759  |
| H  | -0.37106 | -2.68353 | -0.65635 |
| H  | -0.28431 | -2.49302 | 1.08734  |
| O  | 2.83111  | -2.76090 | -0.23664 |
| C  | -1.02791 | -0.75050 | 0.05851  |
| H  | -0.81651 | -0.07076 | 0.88675  |
| H  | -0.84243 | -0.19506 | -0.86477 |
| C  | -2.48952 | -1.13956 | 0.10628  |
| H  | -2.71085 | -1.68071 | 1.03390  |
| H  | -2.73516 | -1.79980 | -0.73395 |
| O  | -3.29065 | 0.03105  | 0.03785  |
| H  | 3.30655  | -2.98829 | 0.56484  |
| C  | -4.67232 | -0.26526 | 0.05648  |
| H  | -4.93484 | -0.79785 | 0.97756  |
| H  | -4.93532 | -0.90379 | -0.79445 |
| C  | -5.43090 | 1.04024  | -0.02245 |
| H  | -5.16262 | 1.56836  | -0.94094 |
| H  | -5.17078 | 1.67162  | 0.83091  |

|   |          |         |          |
|---|----------|---------|----------|
| O | -6.81919 | 0.72776 | -0.01075 |
| H | -7.31010 | 1.54954 | -0.06605 |

TriSil-1n-aH-O2.log Energy: -1126997.7914981

|    |          |          |          |
|----|----------|----------|----------|
| C  | 0.76832  | -0.29330 | 2.06521  |
| H  | 0.80800  | -1.36654 | 2.25709  |
| O  | 0.99362  | -0.72130 | -0.76006 |
| O  | 1.44050  | 1.71554  | 0.15496  |
| Si | 0.85999  | -2.29586 | -1.29193 |
| Si | 0.65975  | 2.54586  | -1.07190 |
| C  | 2.32069  | -2.64707 | -2.38984 |
| H  | 3.25336  | -2.54592 | -1.83046 |
| H  | 2.27421  | -3.66235 | -2.78956 |
| H  | 2.35155  | -1.95196 | -3.23116 |
| C  | -0.75035 | -2.37373 | -2.21960 |
| H  | -0.91387 | -3.36968 | -2.63677 |
| H  | -1.58729 | -2.14237 | -1.55681 |
| H  | -0.75903 | -1.65686 | -3.04313 |
| C  | 0.84592  | -3.43958 | 0.17884  |
| H  | 1.75967  | -3.34024 | 0.76906  |
| H  | -0.00717 | -3.23470 | 0.82844  |
| H  | 0.77457  | -4.47774 | -0.15365 |
| C  | -1.10121 | 1.95484  | -1.23747 |
| H  | -1.62917 | 1.99703  | -0.28301 |
| H  | -1.63529 | 2.59468  | -1.94436 |
| H  | -1.14334 | 0.93139  | -1.61297 |
| C  | 1.58956  | 2.26143  | -2.66122 |
| H  | 1.58173  | 1.20336  | -2.93024 |
| H  | 1.13114  | 2.82136  | -3.47950 |
| H  | 2.62878  | 2.58400  | -2.57180 |
| C  | 0.70439  | 4.33709  | -0.57179 |
| H  | 0.17801  | 4.49074  | 0.37243  |
| H  | 1.73175  | 4.68582  | -0.45036 |
| H  | 0.22382  | 4.95822  | -1.33077 |
| C  | -0.66358 | 0.21894  | 2.15382  |
| H  | -1.01831 | 0.10624  | 3.18006  |
| H  | -0.70252 | 1.27913  | 1.89818  |
| C  | -1.58453 | -0.54918 | 1.22522  |
| H  | -1.23479 | -0.48981 | 0.19356  |
| H  | -1.62220 | -1.60761 | 1.50664  |

|    |          |          |          |
|----|----------|----------|----------|
| C  | -3.73186 | -0.48505 | 0.29768  |
| H  | -3.82770 | -1.57303 | 0.38644  |
| H  | -3.31668 | -0.25628 | -0.69055 |
| C  | -5.08410 | 0.17170  | 0.45506  |
| H  | -5.50153 | -0.06645 | 1.43647  |
| H  | -4.97793 | 1.25670  | 0.37501  |
| O  | -2.88046 | 0.01801  | 1.30846  |
| O  | -5.91954 | -0.32969 | -0.58170 |
| Si | 1.69214  | 0.12714  | 0.44329  |
| C  | 3.49410  | -0.24836 | 0.58748  |
| H  | 3.97730  | 0.37007  | 1.34454  |
| H  | 3.65145  | -1.29673 | 0.84770  |
| H  | 3.98075  | -0.05747 | -0.37133 |
| H  | -6.79075 | 0.05658  | -0.47734 |
| O  | 1.48616  | 0.33911  | 3.17341  |
| O  | 2.44860  | -0.39241 | 3.65185  |

TriSil-1n-bH-O2.log Energy: -1127001.5936595

|    |          |          |          |
|----|----------|----------|----------|
| C  | 0.11289  | 1.72768  | 0.05203  |
| H  | 0.24401  | 2.55328  | -0.65503 |
| H  | 0.91706  | 1.80781  | 0.78655  |
| O  | 2.04619  | 0.26253  | -1.35437 |
| O  | 0.17043  | -1.19807 | -0.09856 |
| Si | 3.57494  | 0.23689  | -0.70161 |
| Si | 0.08482  | -1.81413 | 1.44428  |
| C  | 4.73280  | 0.65951  | -2.09760 |
| H  | 4.51027  | 1.64793  | -2.50470 |
| H  | 5.76845  | 0.66272  | -1.75074 |
| H  | 4.65077  | -0.06816 | -2.90757 |
| C  | 3.94641  | -1.46776 | -0.04563 |
| H  | 5.00613  | -1.54504 | 0.20959  |
| H  | 3.37288  | -1.68879 | 0.85465  |
| H  | 3.72348  | -2.23300 | -0.79151 |
| C  | 3.71475  | 1.50316  | 0.66043  |
| H  | 3.43935  | 2.49766  | 0.30397  |
| H  | 3.07864  | 1.25534  | 1.51184  |
| H  | 4.74672  | 1.54776  | 1.01729  |
| C  | -1.70778 | -1.96109 | 1.93129  |
| H  | -2.27214 | -2.51189 | 1.17621  |
| H  | -1.79139 | -2.50310 | 2.87653  |

|    |          |          |          |
|----|----------|----------|----------|
| H  | -2.17349 | -0.98349 | 2.06067  |
| C  | 0.98674  | -0.70211 | 2.64003  |
| H  | 0.55679  | 0.30064  | 2.66748  |
| H  | 0.91415  | -1.12135 | 3.64679  |
| H  | 2.04556  | -0.61380 | 2.39340  |
| C  | 0.86378  | -3.50498 | 1.39132  |
| H  | 0.31670  | -4.15882 | 0.70875  |
| H  | 1.90156  | -3.45829 | 1.05746  |
| H  | 0.84600  | -3.96400 | 2.38234  |
| C  | -1.20622 | 1.89642  | 0.76056  |
| H  | -1.31629 | 1.21525  | 1.60307  |
| C  | -2.45181 | 1.81453  | -0.10880 |
| H  | -3.27067 | 2.36497  | 0.36355  |
| H  | -2.26398 | 2.24408  | -1.09896 |
| C  | -3.86924 | 0.20622  | -1.07680 |
| H  | -3.66164 | 0.60479  | -2.07621 |
| H  | -4.77330 | 0.69278  | -0.69516 |
| C  | -4.05968 | -1.29218 | -1.14120 |
| H  | -3.13778 | -1.76149 | -1.49579 |
| H  | -4.28483 | -1.67870 | -0.14410 |
| O  | -2.77957 | 0.44835  | -0.21223 |
| O  | -5.13464 | -1.54862 | -2.03607 |
| Si | 0.45819  | 0.17179  | -0.94710 |
| C  | -0.46652 | 0.09416  | -2.54825 |
| H  | -1.53603 | -0.03641 | -2.39522 |
| H  | -0.30840 | 1.00814  | -3.12374 |
| H  | -0.10219 | -0.74558 | -3.14377 |
| H  | -5.27982 | -2.49599 | -2.06434 |
| O  | -1.15542 | 3.24606  | 1.35379  |
| O  | -2.03383 | 3.41472  | 2.29550  |

TriSil-1n-cH-O2.log Energy: -1127004.6582589

|    |          |          |          |
|----|----------|----------|----------|
| C  | -0.15323 | -0.68715 | 0.27014  |
| H  | -0.12439 | -1.76370 | 0.45868  |
| H  | -0.04455 | -0.55663 | -0.80876 |
| O  | 2.70587  | -0.36971 | 0.35385  |
| O  | 1.22126  | 1.72863  | 0.99826  |
| Si | 3.22483  | -1.73846 | -0.44075 |
| Si | 1.39779  | 2.76062  | -0.30213 |
| C  | 2.79038  | -3.23371 | 0.58590  |

|    |          |          |          |
|----|----------|----------|----------|
| H  | 1.70981  | -3.32326 | 0.71725  |
| H  | 3.14429  | -4.14646 | 0.10116  |
| H  | 3.25104  | -3.17656 | 1.57417  |
| C  | 5.06788  | -1.56290 | -0.62768 |
| H  | 5.48722  | -2.42661 | -1.14818 |
| H  | 5.31575  | -0.66897 | -1.20384 |
| H  | 5.55474  | -1.48572 | 0.34643  |
| C  | 2.40425  | -1.82787 | -2.11200 |
| H  | 1.32860  | -1.98768 | -2.02236 |
| H  | 2.56907  | -0.90779 | -2.67645 |
| H  | 2.81953  | -2.65625 | -2.69103 |
| C  | 0.49170  | 4.32364  | 0.14521  |
| H  | 0.89942  | 4.76665  | 1.05605  |
| H  | 0.57779  | 5.06078  | -0.65608 |
| H  | -0.56943 | 4.12474  | 0.30866  |
| C  | 0.65704  | 1.98811  | -1.83113 |
| H  | -0.39599 | 1.74070  | -1.68227 |
| H  | 0.72361  | 2.69003  | -2.66592 |
| H  | 1.18760  | 1.07775  | -2.11802 |
| C  | 3.21279  | 3.08838  | -0.56651 |
| H  | 3.67315  | 3.49800  | 0.33480  |
| H  | 3.73853  | 2.16864  | -0.82981 |
| H  | 3.35936  | 3.80632  | -1.37669 |
| C  | -1.48675 | -0.10045 | 0.72846  |
| H  | -1.65779 | -0.27477 | 1.79292  |
| H  | -1.50402 | 0.97946  | 0.57038  |
| C  | -2.66282 | -0.65138 | -0.03770 |
| H  | -2.54875 | -0.57146 | -1.12031 |
| C  | -4.96005 | -0.30485 | -0.43123 |
| H  | -5.17915 | -1.37116 | -0.51561 |
| H  | -4.74441 | 0.09461  | -1.42529 |
| C  | -6.12752 | 0.42317  | 0.19349  |
| H  | -6.32501 | 0.01816  | 1.18888  |
| H  | -5.89097 | 1.48571  | 0.28920  |
| O  | -3.83377 | -0.09684 | 0.42100  |
| O  | -7.24662 | 0.23032  | -0.66126 |
| Si | 1.32126  | 0.09027  | 1.11410  |
| C  | 1.39310  | -0.36089 | 2.90855  |
| H  | 0.49314  | -0.03170 | 3.43148  |
| H  | 1.47224  | -1.44450 | 3.01931  |

|   |          |          |          |
|---|----------|----------|----------|
| H | 2.25697  | 0.09580  | 3.39466  |
| H | -8.00129 | 0.67271  | -0.26822 |
| O | -2.74324 | -2.11068 | 0.22919  |
| O | -2.54739 | -2.83489 | -0.83170 |

TriSil-1n-dH-O2.log Energy: -1127003.6173775

|    |          |          |          |
|----|----------|----------|----------|
| C  | -0.07116 | -1.16938 | 0.25344  |
| H  | -0.10617 | -2.25747 | 0.35683  |
| H  | 0.04494  | -0.96645 | -0.81538 |
| O  | 2.74908  | -1.44058 | 0.67679  |
| O  | 1.73068  | 1.02632  | 0.73266  |
| Si | 3.90546  | -1.27985 | -0.51192 |
| Si | 1.23197  | 2.30297  | -0.20310 |
| C  | 4.75391  | -2.93227 | -0.63883 |
| H  | 4.05067  | -3.71247 | -0.93705 |
| H  | 5.55289  | -2.89608 | -1.38269 |
| H  | 5.19637  | -3.21960 | 0.31714  |
| C  | 5.11608  | 0.04771  | -0.01630 |
| H  | 5.88190  | 0.17366  | -0.78523 |
| H  | 4.61198  | 1.00591  | 0.11885  |
| H  | 5.61754  | -0.20920 | 0.91906  |
| C  | 3.08897  | -0.83862 | -2.13014 |
| H  | 2.26103  | -1.51407 | -2.35449 |
| H  | 2.70672  | 0.18241  | -2.11861 |
| H  | 3.81281  | -0.91085 | -2.94545 |
| C  | 0.28939  | 3.47443  | 0.89712  |
| H  | 0.90651  | 3.81725  | 1.72991  |
| H  | -0.04080 | 4.35170  | 0.33638  |
| H  | -0.59613 | 2.98488  | 1.30882  |
| C  | 0.13651  | 1.75745  | -1.61292 |
| H  | -0.82778 | 1.38601  | -1.26381 |
| H  | -0.05573 | 2.62054  | -2.25586 |
| H  | 0.60171  | 0.98395  | -2.22527 |
| C  | 2.77440  | 3.10379  | -0.87483 |
| H  | 3.44246  | 3.40801  | -0.06667 |
| H  | 3.31962  | 2.41864  | -1.52724 |
| H  | 2.52106  | 3.99319  | -1.45641 |
| C  | -1.37349 | -0.55562 | 0.77709  |
| H  | -1.57915 | -0.92135 | 1.78491  |
| H  | -1.29659 | 0.53281  | 0.84532  |



|    |          |          |          |
|----|----------|----------|----------|
| C  | -2.53653 | -0.89859 | -0.12291 |
| H  | -2.38040 | -0.49651 | -1.12771 |
| H  | -2.66447 | -1.98089 | -0.19470 |
| C  | -4.84368 | -0.46242 | -0.34577 |
| C  | -5.92514 | 0.49983  | 0.08522  |
| H  | -6.85131 | 0.22892  | -0.42495 |
| H  | -6.06974 | 0.41161  | 1.16473  |
| O  | -3.72870 | -0.31187 | 0.42595  |
| O  | -5.49978 | 1.80100  | -0.27741 |
| Si | 1.44743  | -0.54130 | 1.13096  |
| C  | 1.27860  | -0.65856 | 2.97291  |
| H  | 0.43998  | -0.05277 | 3.32146  |
| H  | 1.10376  | -1.69026 | 3.28428  |
| H  | 2.18392  | -0.30173 | 3.46762  |
| H  | -6.16562 | 2.42384  | 0.02117  |
| H  | -4.63942 | -0.41625 | -1.41704 |
| O  | -5.35292 | -1.83297 | -0.09373 |
| O  | -6.06055 | -2.28307 | -1.08494 |

TriSil-1n-eH-O2.log Energy: -1127004.6252519

|    |          |          |          |
|----|----------|----------|----------|
| C  | 0.25836  | -1.15050 | 0.35986  |
| H  | 0.32530  | -2.21980 | 0.58444  |
| H  | 0.42337  | -1.05546 | -0.71556 |
| O  | 3.08943  | -0.94437 | 0.80411  |
| O  | 1.64412  | 1.31623  | 0.97425  |
| Si | 3.94038  | -1.31738 | -0.57563 |
| Si | 1.23389  | 2.41752  | -0.20171 |
| C  | 5.31407  | -2.45427 | -0.03923 |
| H  | 4.91438  | -3.36782 | 0.40567  |
| H  | 5.93377  | -2.73737 | -0.89283 |
| H  | 5.95697  | -1.96992 | 0.69858  |
| C  | 4.63462  | 0.24547  | -1.31680 |
| H  | 5.32892  | -0.00046 | -2.12404 |
| H  | 3.84529  | 0.86973  | -1.73774 |
| H  | 5.17714  | 0.83074  | -0.57213 |
| C  | 2.83641  | -2.16760 | -1.81556 |
| H  | 2.31331  | -3.01628 | -1.37112 |
| H  | 2.09343  | -1.48212 | -2.22681 |
| H  | 3.44076  | -2.54119 | -2.64596 |
| C  | -0.21201 | 3.41518  | 0.42100  |

|    |          |          |          |
|----|----------|----------|----------|
| H  | 0.03633  | 3.92226  | 1.35559  |
| H  | -0.49095 | 4.17694  | -0.31083 |
| H  | -1.08459 | 2.78352  | 0.59782  |
| C  | 0.77081  | 1.54853  | -1.78717 |
| H  | -0.17115 | 1.00689  | -1.68267 |
| H  | 0.64434  | 2.28792  | -2.58187 |
| H  | 1.53926  | 0.84237  | -2.10697 |
| C  | 2.70535  | 3.53085  | -0.45930 |
| H  | 2.96412  | 4.04712  | 0.46761  |
| H  | 3.58059  | 2.97019  | -0.79071 |
| H  | 2.48211  | 4.28827  | -1.21421 |
| C  | -1.13428 | -0.62868 | 0.72006  |
| H  | -1.33682 | -0.78432 | 1.78217  |
| H  | -1.19977 | 0.44630  | 0.53704  |
| C  | -2.20507 | -1.32040 | -0.09377 |
| H  | -2.03497 | -1.15497 | -1.16395 |
| H  | -2.18803 | -2.40109 | 0.08793  |
| C  | -4.51917 | -1.40823 | -0.46089 |
| H  | -4.57340 | -2.48040 | -0.25129 |
| H  | -4.38170 | -1.27036 | -1.53918 |
| C  | -5.82607 | -0.79088 | -0.03851 |
| H  | -5.96101 | -0.76713 | 1.04151  |
| O  | -3.47913 | -0.80053 | 0.26692  |
| O  | -6.86336 | -1.41606 | -0.69934 |
| Si | 1.64920  | -0.30266 | 1.26813  |
| C  | 1.50787  | -0.52434 | 3.10302  |
| H  | 0.57991  | -0.08617 | 3.47513  |
| H  | 1.51303  | -1.58331 | 3.36801  |
| H  | 2.34052  | -0.04043 | 3.61713  |
| H  | -7.68647 | -1.23584 | -0.23666 |
| O  | -5.75790 | 0.62176  | -0.45913 |
| O  | -6.71290 | 1.32128  | 0.07802  |

gas\_hydroxyl\_radical.log    Energy: -47525.1728309

|   |         |         |          |
|---|---------|---------|----------|
| O | 0.00000 | 0.00000 | 0.10773  |
| H | 0.00000 | 0.00000 | -0.86187 |

gas\_H\_radical.log    Energy: -315.4291426

|   |         |         |         |
|---|---------|---------|---------|
| H | 0.00000 | 0.00000 | 0.00000 |
|---|---------|---------|---------|

gas\_TriSil-1n-aH-OH-IRC-forward-reactant.log      Energy: -1080600.5846011

|    |          |          |          |
|----|----------|----------|----------|
| C  | -0.33323 | -1.12335 | 1.59856  |
| H  | -0.21479 | -2.19890 | 1.71618  |
| H  | -0.46522 | -2.65164 | -1.24103 |
| O  | 1.91457  | -0.71462 | -0.03337 |
| O  | 0.68043  | 1.44509  | 0.97642  |
| Si | 3.46080  | -1.00972 | -0.58441 |
| Si | 0.19247  | 2.34650  | -0.33000 |
| C  | 4.59310  | 0.39910  | -0.11527 |
| H  | 4.78999  | 0.42412  | 0.95663  |
| H  | 5.55229  | 0.29028  | -0.62545 |
| H  | 4.16578  | 1.35855  | -0.40844 |
| C  | 3.33439  | -1.16740 | -2.43428 |
| H  | 4.29220  | -1.47004 | -2.86151 |
| H  | 2.58462  | -1.91055 | -2.70933 |
| H  | 3.04778  | -0.22023 | -2.89339 |
| C  | 4.05272  | -2.60340 | 0.18508  |
| H  | 4.08315  | -2.52577 | 1.27317  |
| H  | 3.39098  | -3.42979 | -0.07841 |
| H  | 5.05755  | -2.85433 | -0.15956 |
| C  | -1.16737 | 1.46966  | -1.25769 |
| H  | -2.06244 | 1.35548  | -0.64351 |
| H  | -1.44418 | 2.04706  | -2.14250 |
| H  | -0.85228 | 0.47954  | -1.59367 |
| C  | 1.65874  | 2.61412  | -1.45534 |
| H  | 2.02420  | 1.66077  | -1.83857 |
| H  | 1.38493  | 3.23654  | -2.30911 |
| H  | 2.47524  | 3.10801  | -0.92637 |
| C  | -0.41709 | 3.96754  | 0.35871  |
| H  | -1.25621 | 3.80632  | 1.03707  |
| H  | 0.37210  | 4.47690  | 0.91329  |
| H  | -0.75242 | 4.63065  | -0.44081 |
| C  | -1.73194 | -0.61532 | 1.69390  |
| H  | -2.16053 | -0.85235 | 2.67461  |
| H  | -1.76183 | 0.46913  | 1.58810  |
| C  | -2.63591 | -1.22681 | 0.62903  |
| H  | -2.20219 | -1.07112 | -0.36505 |
| H  | -2.72915 | -2.31062 | 0.78827  |
| C  | -4.77741 | -1.04188 | -0.30107 |
| H  | -4.96755 | -2.11952 | -0.22355 |

|    |          |          |          |
|----|----------|----------|----------|
| H  | -4.35459 | -0.84440 | -1.29334 |
| C  | -6.07639 | -0.28331 | -0.13738 |
| H  | -6.48059 | -0.47308 | 0.86160  |
| H  | -5.88044 | 0.78904  | -0.23209 |
| O  | -3.89950 | -0.61250 | 0.70987  |
| O  | -6.95674 | -0.74067 | -1.14782 |
| Si | 1.15429  | -0.08255 | 1.29158  |
| C  | 2.31155  | -0.04747 | 2.74603  |
| H  | 1.77948  | 0.29677  | 3.63359  |
| H  | 2.71474  | -1.03872 | 2.95882  |
| H  | 3.14284  | 0.63541  | 2.56949  |
| H  | -7.78255 | -0.26513 | -1.07969 |
| O  | -0.02257 | -1.98568 | -1.76580 |
| H  | 0.60670  | -1.56961 | -1.16181 |

gas\_TriSil-1n-aH-OH-opt-product.log

Energy: -1080600.5846011

|    |          |          |          |
|----|----------|----------|----------|
| C  | -0.33382 | -1.12244 | 1.59835  |
| H  | -0.21582 | -2.19805 | 1.71596  |
| H  | -0.46710 | -2.65144 | -1.23832 |
| O  | 1.91442  | -0.71478 | -0.03307 |
| O  | 0.68107  | 1.44557  | 0.97637  |
| Si | 3.46053  | -1.01023 | -0.58423 |
| Si | 0.19361  | 2.34668  | -0.33045 |
| C  | 4.59334  | 0.39794  | -0.11435 |
| H  | 4.79026  | 0.42226  | 0.95756  |
| H  | 5.55247  | 0.28909  | -0.62461 |
| H  | 4.16634  | 1.35772  | -0.40693 |
| C  | 3.33414  | -1.16714 | -2.43418 |
| H  | 4.29185  | -1.47002 | -2.86146 |
| H  | 2.58412  | -1.90995 | -2.70946 |
| H  | 3.04792  | -0.21971 | -2.89300 |
| C  | 4.05176  | -2.60450 | 0.18456  |
| H  | 4.08196  | -2.52746 | 1.27270  |
| H  | 3.38979  | -3.43051 | -0.07954 |
| H  | 5.05658  | -2.85560 | -0.15999 |
| C  | -1.16542 | 1.46928  | -1.25881 |
| H  | -2.06101 | 1.35547  | -0.64533 |
| H  | -1.44150 | 2.04614  | -2.14419 |
| H  | -0.85006 | 0.47896  | -1.59394 |
| C  | 1.66047  | 2.61459  | -1.45495 |

|    |          |          |          |
|----|----------|----------|----------|
| H  | 2.02611  | 1.66133  | -1.83823 |
| H  | 1.38711  | 3.23721  | -2.30870 |
| H  | 2.47670  | 3.10832  | -0.92542 |
| C  | -0.41687 | 3.96762  | 0.35769  |
| H  | -1.25630 | 3.80621  | 1.03562  |
| H  | 0.37185  | 4.47732  | 0.91264  |
| H  | -0.75197 | 4.63051  | -0.44210 |
| C  | -1.73237 | -0.61391 | 1.69330  |
| H  | -2.16107 | -0.85026 | 2.67414  |
| H  | -1.76195 | 0.47048  | 1.58690  |
| C  | -2.63648 | -1.22581 | 0.62879  |
| H  | -2.20288 | -1.07046 | -0.36542 |
| H  | -2.72966 | -2.30957 | 0.78845  |
| C  | -4.77817 | -1.04150 | -0.30097 |
| H  | -4.96815 | -2.11912 | -0.22289 |
| H  | -4.35562 | -0.84445 | -1.29345 |
| C  | -6.07721 | -0.28301 | -0.13734 |
| H  | -6.48116 | -0.47238 | 0.86181  |
| H  | -5.88141 | 0.78932  | -0.23256 |
| O  | -3.90006 | -0.61151 | 0.70954  |
| O  | -6.95771 | -0.74092 | -1.14739 |
| Si | 1.15422  | -0.08226 | 1.29169  |
| C  | 2.31122  | -0.04769 | 2.74635  |
| H  | 1.77912  | 0.29655  | 3.63389  |
| H  | 2.71411  | -1.03910 | 2.95902  |
| H  | 3.14274  | 0.63497  | 2.57004  |
| H  | -7.78359 | -0.26550 | -1.07926 |
| O  | -0.02236 | -1.98793 | -1.76445 |
| H  | 0.60657  | -1.57105 | -1.16069 |

gas\_TriSil-1n-aH-OH-radical.log      Energy: -1032629.8713741

|    |         |          |          |
|----|---------|----------|----------|
| C  | 0.53530 | -0.30162 | 2.38992  |
| H  | 0.86325 | -0.99652 | 3.15623  |
| O  | 1.57637 | -0.57504 | -0.27564 |
| O  | 1.24075 | 1.83219  | 0.69642  |
| Si | 1.57811 | -2.13806 | -0.80486 |
| Si | 0.59720 | 2.53335  | -0.66197 |
| C  | 3.24031 | -2.49034 | -1.57573 |
| H  | 4.03973 | -2.37125 | -0.84240 |
| H  | 3.28894 | -3.50910 | -1.96452 |

|    |          |          |          |
|----|----------|----------|----------|
| H  | 3.43772  | -1.80427 | -2.40069 |
| C  | 0.21561  | -2.29183 | -2.06993 |
| H  | 0.19857  | -3.28897 | -2.51336 |
| H  | -0.76151 | -2.10996 | -1.61898 |
| H  | 0.35383  | -1.56799 | -2.87477 |
| C  | 1.27396  | -3.29731 | 0.63019  |
| H  | 2.04578  | -3.19136 | 1.39495  |
| H  | 0.30920  | -3.09791 | 1.09874  |
| H  | 1.27809  | -4.33612 | 0.29455  |
| C  | -0.94368 | 1.61977  | -1.19609 |
| H  | -1.67533 | 1.55255  | -0.38844 |
| H  | -1.41648 | 2.13198  | -2.03661 |
| H  | -0.69197 | 0.60803  | -1.51736 |
| C  | 1.86523  | 2.48545  | -2.03178 |
| H  | 2.12881  | 1.45138  | -2.25870 |
| H  | 1.48103  | 2.94840  | -2.94261 |
| H  | 2.77526  | 3.01334  | -1.74266 |
| C  | 0.18140  | 4.28940  | -0.19301 |
| H  | -0.54844 | 4.30955  | 0.61769  |
| H  | 1.07179  | 4.82299  | 0.14219  |
| H  | -0.24019 | 4.83215  | -1.04105 |
| C  | -0.92046 | 0.04095  | 2.35547  |
| H  | -1.39821 | -0.09749 | 3.32619  |
| H  | -1.04710 | 1.08929  | 2.07199  |
| C  | -1.66768 | -0.78701 | 1.31059  |
| H  | -1.11907 | -0.76601 | 0.36223  |
| H  | -1.74162 | -1.83554 | 1.62801  |
| C  | -3.64853 | -0.84597 | 0.06948  |
| H  | -3.82335 | -1.91006 | 0.27042  |
| H  | -3.07737 | -0.76590 | -0.86388 |
| C  | -4.97186 | -0.12912 | -0.08364 |
| H  | -5.52882 | -0.19494 | 0.85584  |
| H  | -4.78314 | 0.92679  | -0.30017 |
| O  | -2.95140 | -0.24006 | 1.12936  |
| O  | -5.66714 | -0.75990 | -1.14374 |
| Si | 1.70215  | 0.31758  | 1.10175  |
| C  | 3.46125  | 0.29988  | 1.69210  |
| H  | 3.59868  | 0.97055  | 2.54063  |
| H  | 3.75699  | -0.70433 | 2.00245  |
| H  | 4.13108  | 0.61741  | 0.89190  |

|   |          |          |          |
|---|----------|----------|----------|
| H | -6.50412 | -0.31784 | -1.27342 |
|---|----------|----------|----------|

gas\_TriSil-1n-aH-OH-TS.log Energy: -1080575.3560598

|    |          |          |          |
|----|----------|----------|----------|
| C  | -0.42292 | -0.93927 | 0.28835  |
| H  | -0.32427 | -2.02544 | 0.36560  |
| H  | -0.32303 | -0.75301 | -0.86584 |
| O  | 2.30899  | -0.42105 | -0.07648 |
| O  | 0.83819  | 1.54262  | 0.94846  |
| Si | 3.41895  | -1.63701 | -0.28355 |
| Si | 0.74477  | 2.79051  | -0.14598 |
| C  | 4.73351  | -1.49990 | 1.03306  |
| H  | 4.30874  | -1.63460 | 2.02890  |
| H  | 5.50495  | -2.25934 | 0.89300  |
| H  | 5.21424  | -0.52118 | 1.00061  |
| C  | 4.13794  | -1.38947 | -1.98408 |
| H  | 4.91674  | -2.12449 | -2.19418 |
| H  | 3.36931  | -1.49208 | -2.75234 |
| H  | 4.57742  | -0.39516 | -2.07549 |
| C  | 2.53504  | -3.27886 | -0.16847 |
| H  | 2.09551  | -3.42690 | 0.81996  |
| H  | 1.73324  | -3.33278 | -0.90713 |
| H  | 3.22018  | -4.10811 | -0.35292 |
| C  | -0.86206 | 2.66931  | -1.08410 |
| H  | -1.72110 | 2.75035  | -0.41630 |
| H  | -0.93448 | 3.47364  | -1.81911 |
| H  | -0.92340 | 1.71975  | -1.61886 |
| C  | 2.19095  | 2.69028  | -1.32294 |
| H  | 2.14497  | 1.78191  | -1.92402 |
| H  | 2.19287  | 3.54555  | -2.00135 |
| H  | 3.13594  | 2.68446  | -0.77829 |
| C  | 0.81780  | 4.36166  | 0.85439  |
| H  | -0.00382 | 4.40176  | 1.57089  |
| H  | 1.75401  | 4.42575  | 1.41059  |
| H  | 0.74633  | 5.23925  | 0.20930  |
| C  | -1.79229 | -0.46102 | 0.73514  |
| H  | -1.95339 | -0.74140 | 1.78074  |
| H  | -1.85123 | 0.62635  | 0.68973  |
| C  | -2.91165 | -1.04840 | -0.10176 |
| H  | -2.78565 | -0.75150 | -1.15105 |
| H  | -2.87975 | -2.14621 | -0.06451 |

|    |          |          |          |
|----|----------|----------|----------|
| C  | -5.24244 | -1.04612 | -0.34732 |
| H  | -5.29319 | -2.14188 | -0.32872 |
| H  | -5.16903 | -0.73097 | -1.39522 |
| C  | -6.49607 | -0.46837 | 0.27268  |
| H  | -6.55609 | -0.78039 | 1.31977  |
| H  | -6.44214 | 0.62397  | 0.24093  |
| O  | -4.14318 | -0.58158 | 0.39432  |
| O  | -7.59508 | -0.95503 | -0.47645 |
| Si | 1.08407  | -0.06406 | 0.96271  |
| C  | 1.49206  | -0.58718 | 2.69722  |
| H  | 0.66430  | -0.35092 | 3.36713  |
| H  | 1.67969  | -1.66050 | 2.75735  |
| H  | 2.37738  | -0.06191 | 3.05736  |
| H  | -8.40209 | -0.59212 | -0.11625 |
| O  | 0.13132  | -0.59083 | -2.22523 |
| H  | 1.05678  | -0.46289 | -1.96468 |

gas\_TriSil-1n-bH-OH-opt-product\_re.log Energy: -1080603.6326907

|    |          |          |          |
|----|----------|----------|----------|
| C  | -0.11657 | -2.26891 | 0.68824  |
| H  | 0.45794  | -3.14751 | 1.01620  |
| H  | -0.27661 | -2.37672 | -0.38708 |
| O  | 2.47676  | -1.22359 | 0.26094  |
| O  | 0.47155  | 0.51120  | 0.23942  |
| Si | 3.44039  | -0.53280 | -0.89948 |
| Si | 0.03774  | 2.09721  | 0.47750  |
| C  | 4.83294  | -1.73184 | -1.20769 |
| H  | 4.44849  | -2.68436 | -1.57490 |
| H  | 5.52977  | -1.33991 | -1.95074 |
| H  | 5.38953  | -1.92455 | -0.28956 |
| C  | 4.09976  | 1.09016  | -0.24583 |
| H  | 4.77116  | 1.56056  | -0.96653 |
| H  | 3.28282  | 1.78594  | -0.04907 |
| H  | 4.65225  | 0.94355  | 0.68358  |
| C  | 2.45257  | -0.24087 | -2.45531 |
| H  | 1.94052  | -1.14971 | -2.77479 |
| H  | 1.69945  | 0.53198  | -2.29977 |
| H  | 3.10132  | 0.08318  | -3.27136 |
| C  | -1.79742 | 2.16216  | 0.77642  |
| H  | -2.09069 | 1.50429  | 1.59545  |
| H  | -2.12357 | 3.17717  | 1.01096  |



|    |          |          |          |
|----|----------|----------|----------|
| H  | -2.32343 | 1.82641  | -0.11714 |
| C  | 0.47705  | 2.99158  | -1.09766 |
| H  | -0.04363 | 2.53883  | -1.94357 |
| H  | 0.18330  | 4.04153  | -1.04585 |
| H  | 1.54901  | 2.95174  | -1.29681 |
| C  | 0.97557  | 2.81123  | 1.92775  |
| H  | 0.67192  | 2.35209  | 2.86898  |
| H  | 2.05276  | 2.67731  | 1.81702  |
| H  | 0.77948  | 3.88280  | 2.00165  |
| C  | -1.39981 | -2.17472 | 1.41930  |
| H  | -1.38369 | -2.04442 | 2.49421  |
| H  | -0.55860 | -0.02611 | -1.50588 |
| C  | -2.71930 | -2.25141 | 0.74982  |
| H  | -2.68197 | -2.95216 | -0.09430 |
| H  | -3.48576 | -2.60090 | 1.44982  |
| C  | -4.40715 | -1.00263 | -0.33040 |
| H  | -5.15139 | -1.31308 | 0.41126  |
| H  | -4.43724 | -1.71436 | -1.16312 |
| C  | -4.73510 | 0.38660  | -0.83376 |
| H  | -4.67347 | 1.09568  | -0.00246 |
| H  | -4.00465 | 0.67790  | -1.59462 |
| O  | -3.11855 | -0.96775 | 0.25023  |
| O  | -6.04552 | 0.32877  | -1.36724 |
| Si | 1.05964  | -0.83323 | 0.97269  |
| C  | 1.33431  | -0.54801 | 2.78847  |
| H  | 0.41586  | -0.23730 | 3.28867  |
| H  | 1.68511  | -1.46630 | 3.26182  |
| H  | 2.08867  | 0.22234  | 2.94957  |
| H  | -6.23561 | 1.15220  | -1.81293 |
| O  | -1.38267 | -0.28764 | -1.92409 |
| H  | -1.95144 | -0.49249 | -1.16884 |

gas\_TriSil-1n-bH-OH-opt-reactant-re.log Energy: -1080580.3591928

|    |          |          |          |
|----|----------|----------|----------|
| C  | -0.15210 | -1.18552 | 0.39178  |
| H  | -0.12086 | -2.24221 | 0.67605  |
| H  | 0.04220  | -1.15523 | -0.68347 |
| O  | 2.67428  | -0.75551 | 0.64610  |
| O  | 1.02916  | 1.32387  | 1.05790  |
| Si | 3.54037  | -1.44369 | -0.57409 |
| Si | 1.03258  | 2.41147  | -0.19000 |

|    |          |          |          |
|----|----------|----------|----------|
| C  | 4.72357  | -2.66059 | 0.19833  |
| H  | 4.18299  | -3.44988 | 0.72295  |
| H  | 5.35538  | -3.12973 | -0.55805 |
| H  | 5.37285  | -2.16240 | 0.91957  |
| C  | 4.47998  | -0.10277 | -1.47026 |
| H  | 5.11731  | -0.53120 | -2.24626 |
| H  | 3.80380  | 0.60737  | -1.94843 |
| H  | 5.11741  | 0.45198  | -0.78015 |
| C  | 2.40808  | -2.32890 | -1.77159 |
| H  | 1.78909  | -3.06846 | -1.26151 |
| H  | 1.74610  | -1.63610 | -2.29326 |
| H  | 3.00018  | -2.85103 | -2.52598 |
| C  | -0.30125 | 3.66307  | 0.14874  |
| H  | -0.14600 | 4.13760  | 1.11882  |
| H  | -0.30136 | 4.44589  | -0.61240 |
| H  | -1.28885 | 3.19818  | 0.15023  |
| C  | 0.67774  | 1.51546  | -1.79741 |
| H  | -0.31660 | 1.06551  | -1.78190 |
| H  | 0.71371  | 2.21081  | -2.63801 |
| H  | 1.40667  | 0.72602  | -1.98814 |
| C  | 2.71447  | 3.21588  | -0.26064 |
| H  | 2.91726  | 3.76041  | 0.66273  |
| H  | 3.49712  | 2.46707  | -0.38683 |
| H  | 2.78097  | 3.92191  | -1.09046 |
| C  | -1.53227 | -0.59287 | 0.68221  |
| H  | -1.75862 | -0.63966 | 1.74979  |
| H  | -1.54703 | 0.46441  | 0.40900  |
| C  | -2.62805 | -1.30907 | -0.07875 |
| H  | -2.42092 | -1.28759 | -1.15632 |
| H  | -2.68784 | -2.35997 | 0.22806  |
| C  | -4.96159 | -1.30705 | -0.45611 |
| H  | -5.04690 | -2.34428 | -0.11589 |
| H  | -4.82494 | -1.31403 | -1.54303 |
| C  | -6.22042 | -0.54541 | -0.09936 |
| H  | -6.33508 | -0.52975 | 0.98887  |
| H  | -6.13535 | 0.48692  | -0.45149 |
| O  | -3.86974 | -0.67358 | 0.17868  |
| O  | -7.29459 | -1.22126 | -0.72467 |
| Si | 1.23775  | -0.28353 | 1.26704  |
| C  | 1.23969  | -0.61645 | 3.09107  |

|   |          |          |          |
|---|----------|----------|----------|
| H | 0.30120  | -0.29731 | 3.54621  |
| H | 1.37842  | -1.67874 | 3.29618  |
| H | 2.05021  | -0.06851 | 3.57250  |
| H | -8.10002 | -0.72820 | -0.57891 |
| O | -3.76172 | 2.11731  | -0.14899 |
| H | -3.79870 | 1.14938  | 0.01821  |

gas\_TriSil-1n-bH-OH-radical.log Energy: -1032628.3516529

|    |          |          |          |
|----|----------|----------|----------|
| C  | -0.26955 | -0.83899 | -1.50441 |
| H  | -0.25226 | -1.93400 | -1.52330 |
| H  | 0.54576  | -0.48768 | -2.14165 |
| O  | 1.67383  | -0.78747 | 0.61883  |
| O  | 0.10934  | 1.33068  | 0.33529  |
| Si | 3.00388  | -1.66839 | 0.20994  |
| Si | 1.22398  | 2.52021  | 0.05126  |
| C  | 2.94969  | -3.28603 | 1.13841  |
| H  | 2.06940  | -3.86698 | 0.85790  |
| H  | 3.83257  | -3.89182 | 0.92622  |
| H  | 2.90860  | -3.11354 | 2.21474  |
| C  | 4.49853  | -0.66873 | 0.70680  |
| H  | 5.42197  | -1.20666 | 0.48483  |
| H  | 4.52702  | 0.28277  | 0.17305  |
| H  | 4.48312  | -0.45258 | 1.77612  |
| C  | 3.04023  | -1.99300 | -1.63135 |
| H  | 2.17877  | -2.57866 | -1.95468 |
| H  | 3.04870  | -1.06395 | -2.20354 |
| H  | 3.94079  | -2.55225 | -1.89316 |
| C  | 0.27558  | 4.11061  | -0.15678 |
| H  | -0.30822 | 4.32985  | 0.73820  |
| H  | 0.94943  | 4.95038  | -0.33604 |
| H  | -0.41452 | 4.04263  | -0.99884 |
| C  | 2.17148  | 2.11575  | -1.51240 |
| H  | 1.49605  | 2.00282  | -2.36230 |
| H  | 2.88404  | 2.90669  | -1.75331 |
| H  | 2.73155  | 1.18628  | -1.39804 |
| C  | 2.39758  | 2.61996  | 1.49812  |
| H  | 1.86241  | 2.87274  | 2.41461  |
| H  | 2.88968  | 1.65847  | 1.64901  |
| H  | 3.16632  | 3.37766  | 1.33538  |
| C  | -1.57464 | -0.31246 | -1.95664 |

|    |          |          |          |
|----|----------|----------|----------|
| H  | -1.62469 | 0.69246  | -2.35507 |
| C  | -2.85914 | -0.96716 | -1.61483 |
| H  | -3.50346 | -1.05517 | -2.50163 |
| H  | -2.68367 | -1.98213 | -1.23329 |
| C  | -4.76176 | -0.79705 | -0.23830 |
| H  | -4.59277 | -1.79957 | 0.17542  |
| H  | -5.44598 | -0.89640 | -1.09013 |
| C  | -5.38363 | 0.08911  | 0.81875  |
| H  | -4.69130 | 0.18192  | 1.66128  |
| H  | -5.55102 | 1.08579  | 0.39993  |
| O  | -3.54893 | -0.20484 | -0.62979 |
| O  | -6.60042 | -0.51933 | 1.21285  |
| Si | 0.15047  | -0.30107 | 0.26051  |
| C  | -1.04338 | -0.99797 | 1.49052  |
| H  | -2.05148 | -0.65380 | 1.25718  |
| H  | -1.03230 | -2.08902 | 1.47036  |
| H  | -0.78294 | -0.67356 | 2.49841  |
| H  | -7.01480 | 0.02044  | 1.88349  |

gas\_TriSil-1n-bH-OH-TS.log Energy: -1080575.9104456

|    |          |          |          |
|----|----------|----------|----------|
| C  | -0.36155 | -1.05025 | 0.31573  |
| H  | -0.34875 | -2.11810 | 0.56846  |
| H  | -0.18880 | -0.99321 | -0.76160 |
| O  | 2.47429  | -0.77830 | 0.57470  |
| O  | 0.96905  | 1.38069  | 1.03621  |
| Si | 3.27400  | -1.69097 | -0.53966 |
| Si | 1.36018  | 2.44877  | -0.17405 |
| C  | 4.17094  | -3.04979 | 0.37124  |
| H  | 3.46744  | -3.70031 | 0.89343  |
| H  | 4.75291  | -3.66665 | -0.31597 |
| H  | 4.85445  | -2.63203 | 1.11169  |
| C  | 4.48570  | -0.58691 | -1.42935 |
| H  | 5.06064  | -1.15566 | -2.16265 |
| H  | 3.97172  | 0.21834  | -1.95643 |
| H  | 5.18879  | -0.13434 | -0.72859 |
| C  | 2.07782  | -2.43449 | -1.77056 |
| H  | 1.33143  | -3.06000 | -1.27900 |
| H  | 1.55346  | -1.66528 | -2.33963 |
| H  | 2.62092  | -3.05997 | -2.48202 |
| C  | 0.34492  | 3.98269  | 0.09506  |

|    |          |          |          |
|----|----------|----------|----------|
| H  | 0.56050  | 4.42341  | 1.06952  |
| H  | 0.55581  | 4.73219  | -0.67015 |
| H  | -0.71574 | 3.73319  | 0.05468  |
| C  | 0.96282  | 1.66364  | -1.82456 |
| H  | -0.10386 | 1.44177  | -1.88609 |
| H  | 1.21742  | 2.33535  | -2.64646 |
| H  | 1.52329  | 0.73755  | -1.96737 |
| C  | 3.18763  | 2.81576  | -0.05390 |
| H  | 3.42126  | 3.30304  | 0.89400  |
| H  | 3.76591  | 1.89297  | -0.10928 |
| H  | 3.51457  | 3.47370  | -0.86134 |
| C  | -1.72415 | -0.46973 | 0.64284  |
| H  | -1.90412 | -0.34052 | 1.71141  |
| H  | -1.75860 | 0.63464  | 0.21986  |
| C  | -2.87439 | -1.19279 | -0.01128 |
| H  | -2.68721 | -1.29808 | -1.08741 |
| H  | -2.97065 | -2.20227 | 0.41222  |
| C  | -5.19541 | -1.07412 | -0.37526 |
| H  | -5.35985 | -2.07001 | 0.05147  |
| H  | -5.06576 | -1.18578 | -1.45799 |
| C  | -6.39254 | -0.19328 | -0.09045 |
| H  | -6.50941 | -0.08306 | 0.99177  |
| H  | -6.22253 | 0.79862  | -0.52142 |
| O  | -4.06459 | -0.46549 | 0.20347  |
| O  | -7.51631 | -0.82402 | -0.67368 |
| Si | 1.07073  | -0.23540 | 1.21379  |
| C  | 1.03101  | -0.62218 | 3.02755  |
| H  | 0.11889  | -0.24180 | 3.48924  |
| H  | 1.08318  | -1.69763 | 3.20298  |
| H  | 1.87943  | -0.15460 | 3.52810  |
| H  | -8.29328 | -0.29235 | -0.51042 |
| O  | -2.27065 | 1.75189  | -0.44935 |
| H  | -3.19306 | 1.46374  | -0.36935 |

gas\_TriSil-1n-cH-OH-opt-product.log

Energy: -1080600.7135418

|   |          |          |          |
|---|----------|----------|----------|
| C | -0.48522 | -0.24866 | -0.06794 |
| H | -0.61881 | -1.33324 | -0.11568 |
| H | -0.29895 | 0.08596  | -1.09287 |
| O | 2.30199  | -0.73620 | 0.27524  |
| O | 1.41372  | 1.68416  | 0.88394  |

|    |          |          |          |
|----|----------|----------|----------|
| Si | 2.53258  | -2.21169 | -0.44014 |
| Si | 2.29719  | 2.58758  | -0.18980 |
| C  | 1.62696  | -3.52564 | 0.53121  |
| H  | 0.54715  | -3.36188 | 0.52685  |
| H  | 1.81013  | -4.51359 | 0.10430  |
| H  | 1.96534  | -3.54245 | 1.56879  |
| C  | 4.37056  | -2.52232 | -0.43400 |
| H  | 4.61064  | -3.47518 | -0.90903 |
| H  | 4.89635  | -1.73390 | -0.97479 |
| H  | 4.75656  | -2.54540 | 0.58598  |
| C  | 1.88777  | -2.14399 | -2.19227 |
| H  | 0.81503  | -1.94673 | -2.20849 |
| H  | 2.38690  | -1.35909 | -2.76304 |
| H  | 2.06006  | -3.09188 | -2.70566 |
| C  | 1.87450  | 4.37371  | 0.13794  |
| H  | 2.12010  | 4.64601  | 1.16532  |
| H  | 2.42925  | 5.03620  | -0.52907 |
| H  | 0.80954  | 4.55567  | -0.01323 |
| C  | 1.81776  | 2.10818  | -1.93403 |
| H  | 0.75665  | 2.28899  | -2.11450 |
| H  | 2.38533  | 2.68340  | -2.66777 |
| H  | 2.01707  | 1.04946  | -2.10933 |
| C  | 4.11411  | 2.26730  | 0.08492  |
| H  | 4.40724  | 2.53788  | 1.10039  |
| H  | 4.33144  | 1.20815  | -0.05833 |
| H  | 4.72776  | 2.84424  | -0.60945 |
| C  | -1.76274 | 0.39798  | 0.47407  |
| H  | -1.92103 | 0.12001  | 1.52055  |
| H  | -1.65822 | 1.49133  | 0.47112  |
| C  | -2.96468 | -0.00160 | -0.30671 |
| H  | -2.91068 | -0.09299 | -1.39053 |
| H  | -2.76944 | -2.10727 | 0.12264  |
| C  | -5.28400 | 0.11506  | -0.59960 |
| H  | -5.38931 | -0.96459 | -0.73393 |
| H  | -5.17606 | 0.57991  | -1.58374 |
| C  | -6.49797 | 0.67532  | 0.10839  |
| H  | -6.58896 | 0.20919  | 1.09416  |
| H  | -6.37007 | 1.75311  | 0.24725  |
| O  | -4.15153 | 0.40046  | 0.20343  |
| O  | -7.61386 | 0.38445  | -0.70970 |

|    |          |          |          |
|----|----------|----------|----------|
| Si | 1.04963  | 0.08911  | 0.94176  |
| C  | 0.81893  | -0.40438 | 2.71624  |
| H  | 0.06975  | 0.21984  | 3.20472  |
| H  | 0.49656  | -1.44484 | 2.78584  |
| H  | 1.75567  | -0.29857 | 3.26428  |
| H  | -8.40460 | 0.72269  | -0.29335 |
| O  | -2.51435 | -3.00082 | 0.39639  |
| H  | -2.94363 | -3.13282 | 1.24129  |

gas\_TriSil-1n-cH-OH-opt-reactant.log

Energy: -1080579.9259164

|    |          |          |          |
|----|----------|----------|----------|
| C  | -0.26459 | -0.77631 | -0.07433 |
| H  | -0.24447 | -1.86944 | -0.00585 |
| H  | -0.06463 | -0.53202 | -1.12236 |
| O  | 2.56556  | -0.56195 | 0.29175  |
| O  | 1.08812  | 1.55586  | 0.86605  |
| Si | 3.22512  | -1.90825 | -0.40169 |
| Si | 1.66078  | 2.64257  | -0.24776 |
| C  | 2.82257  | -3.40069 | 0.64975  |
| H  | 1.74398  | -3.55665 | 0.71766  |
| H  | 3.26175  | -4.30675 | 0.22845  |
| H  | 3.20902  | -3.27906 | 1.66285  |
| C  | 5.06425  | -1.62518 | -0.48572 |
| H  | 5.57436  | -2.47588 | -0.94095 |
| H  | 5.29028  | -0.73905 | -1.08086 |
| H  | 5.47935  | -1.47475 | 0.51167  |
| C  | 2.51775  | -2.12659 | -2.11750 |
| H  | 1.44070  | -2.29683 | -2.08339 |
| H  | 2.70053  | -1.24250 | -2.73058 |
| H  | 2.97560  | -2.98099 | -2.61968 |
| C  | 0.77763  | 4.25262  | 0.06864  |
| H  | 0.96695  | 4.60317  | 1.08408  |
| H  | 1.11273  | 5.02653  | -0.62434 |
| H  | -0.30035 | 4.13501  | -0.05063 |
| C  | 1.27804  | 2.00924  | -1.96739 |
| H  | 0.20400  | 1.87267  | -2.10640 |
| H  | 1.62814  | 2.70848  | -2.72880 |
| H  | 1.76866  | 1.04976  | -2.14134 |
| C  | 3.50408  | 2.82681  | -0.03223 |
| H  | 3.74391  | 3.19504  | 0.96630  |
| H  | 3.99209  | 1.85982  | -0.16124 |

|    |          |          |          |
|----|----------|----------|----------|
| H  | 3.92124  | 3.52547  | -0.75977 |
| C  | -1.64067 | -0.24763 | 0.33522  |
| H  | -1.86246 | -0.52067 | 1.36940  |
| H  | -1.65195 | 0.84329  | 0.29106  |
| C  | -2.73964 | -0.78350 | -0.55848 |
| H  | -2.56167 | -0.48840 | -1.59977 |
| H  | -2.76458 | -1.87994 | -0.52244 |
| C  | -5.07108 | -0.69289 | -0.93135 |
| H  | -5.15872 | -1.78464 | -0.90971 |
| H  | -4.91966 | -0.38298 | -1.97073 |
| C  | -6.33648 | -0.06306 | -0.38910 |
| H  | -6.49254 | -0.38517 | 0.64453  |
| H  | -6.22816 | 1.02594  | -0.39655 |
| O  | -3.98787 | -0.26545 | -0.13203 |
| O  | -7.39241 | -0.48519 | -1.23114 |
| Si | 1.14049  | -0.07676 | 0.94586  |
| C  | 1.02706  | -0.59389 | 2.72273  |
| H  | 0.10272  | -0.23444 | 3.17660  |
| H  | 1.05094  | -1.68118 | 2.81344  |
| H  | 1.86365  | -0.18609 | 3.29086  |
| H  | -8.21956 | -0.16126 | -0.87905 |
| O  | -4.43720 | -0.13401 | 2.64600  |
| H  | -4.25439 | -0.14007 | 1.68128  |

gas\_TriSil-1n-cH-OH-radical.log      Energy: -1032630.5329825

|    |          |          |          |
|----|----------|----------|----------|
| C  | -0.52955 | -0.71213 | 0.11928  |
| H  | -0.55431 | -1.80271 | 0.21169  |
| H  | -0.39311 | -0.50079 | -0.94578 |
| O  | 2.32597  | -0.60937 | 0.28628  |
| O  | 0.98538  | 1.57935  | 0.92668  |
| Si | 2.86777  | -1.99457 | -0.43155 |
| Si | 1.50985  | 2.62392  | -0.24869 |
| C  | 2.45619  | -3.45472 | 0.66124  |
| H  | 1.37720  | -3.55497 | 0.79505  |
| H  | 2.82353  | -4.38589 | 0.22612  |
| H  | 2.90893  | -3.34247 | 1.64768  |
| C  | 4.71094  | -1.81034 | -0.63281 |
| H  | 5.14642  | -2.69080 | -1.10857 |
| H  | 4.94551  | -0.94251 | -1.25117 |
| H  | 5.19464  | -1.67351 | 0.33522  |



|    |          |          |          |
|----|----------|----------|----------|
| C  | 2.04458  | -2.19136 | -2.09724 |
| H  | 0.96438  | -2.30314 | -1.99358 |
| H  | 2.23523  | -1.32432 | -2.73190 |
| H  | 2.42431  | -3.07402 | -2.61550 |
| C  | 0.71458  | 4.27260  | 0.10317  |
| H  | 0.99303  | 4.63151  | 1.09494  |
| H  | 1.02513  | 5.02191  | -0.62727 |
| H  | -0.37295 | 4.19441  | 0.06671  |
| C  | 0.97491  | 1.98090  | -1.92301 |
| H  | -0.11039 | 1.87790  | -1.97678 |
| H  | 1.28794  | 2.65793  | -2.71987 |
| H  | 1.41928  | 1.00333  | -2.11884 |
| C  | 3.37003  | 2.74174  | -0.17632 |
| H  | 3.69891  | 3.11683  | 0.79391  |
| H  | 3.81033  | 1.75454  | -0.32291 |
| H  | 3.75628  | 3.41144  | -0.94693 |
| C  | -1.85829 | -0.12003 | 0.59826  |
| H  | -2.01225 | -0.33092 | 1.66128  |
| H  | -1.81828 | 0.97571  | 0.52020  |
| C  | -3.01677 | -0.64742 | -0.16674 |
| H  | -2.93068 | -0.86305 | -1.22966 |
| C  | -5.33096 | -0.68795 | -0.49892 |
| H  | -5.38220 | -1.77983 | -0.48779 |
| H  | -5.22835 | -0.35561 | -1.53676 |
| C  | -6.58590 | -0.10109 | 0.10906  |
| H  | -6.67379 | -0.43470 | 1.14733  |
| H  | -6.51461 | 0.99080  | 0.10244  |
| O  | -4.23348 | -0.23982 | 0.27149  |
| O  | -7.67189 | -0.55529 | -0.67638 |
| Si | 0.96781  | -0.05418 | 1.02454  |
| C  | 0.96428  | -0.53787 | 2.81604  |
| H  | 0.09601  | -0.12466 | 3.33080  |
| H  | 0.94055  | -1.62350 | 2.92473  |
| H  | 1.86075  | -0.16442 | 3.31194  |
| H  | -8.48546 | -0.20972 | -0.31370 |

gas\_TriSil-1n-cH-OH-TS.log Energy: -1080575.7125040

|   |          |          |          |
|---|----------|----------|----------|
| C | -0.40435 | -0.50446 | -0.01659 |
| H | -0.50003 | -1.59506 | 0.00835  |
| H | -0.22043 | -0.23537 | -1.06149 |

|    |          |          |          |
|----|----------|----------|----------|
| O  | 2.43870  | -0.64320 | 0.26367  |
| O  | 1.25122  | 1.62310  | 0.93946  |
| Si | 2.88852  | -2.04792 | -0.48305 |
| Si | 1.95110  | 2.66043  | -0.14837 |
| C  | 2.30202  | -3.50073 | 0.53594  |
| H  | 1.21336  | -3.51214 | 0.61900  |
| H  | 2.60812  | -4.44515 | 0.08236  |
| H  | 2.71705  | -3.46195 | 1.54437  |
| C  | 4.74781  | -2.01918 | -0.60103 |
| H  | 5.12616  | -2.91810 | -1.09088 |
| H  | 5.08351  | -1.15515 | -1.17663 |
| H  | 5.19827  | -1.95802 | 0.39051  |
| C  | 2.12526  | -2.11036 | -2.18712 |
| H  | 1.03603  | -2.13279 | -2.13157 |
| H  | 2.41641  | -1.24020 | -2.77787 |
| H  | 2.45058  | -3.00286 | -2.72508 |
| C  | 1.29062  | 4.36177  | 0.23130  |
| H  | 1.53529  | 4.65135  | 1.25414  |
| H  | 1.71728  | 5.10717  | -0.44236 |
| H  | 0.20535  | 4.39044  | 0.12394  |
| C  | 1.47225  | 2.14206  | -1.88182 |
| H  | 0.38846  | 2.15394  | -2.01081 |
| H  | 1.90562  | 2.81383  | -2.62493 |
| H  | 1.82897  | 1.13228  | -2.09276 |
| C  | 3.80479  | 2.59688  | 0.04787  |
| H  | 4.09989  | 2.89643  | 1.05456  |
| H  | 4.16170  | 1.57986  | -0.11977 |
| H  | 4.30217  | 3.26028  | -0.66208 |
| C  | -1.70649 | 0.13383  | 0.46868  |
| H  | -1.90638 | -0.14760 | 1.50517  |
| H  | -1.62979 | 1.22309  | 0.44932  |
| C  | -2.88614 | -0.29221 | -0.37530 |
| H  | -2.76500 | 0.02452  | -1.42046 |
| H  | -2.92987 | -1.41317 | -0.40159 |
| C  | -5.20729 | -0.07983 | -0.62708 |
| H  | -5.32630 | -1.16256 | -0.74916 |
| H  | -5.10574 | 0.36486  | -1.62348 |
| C  | -6.41831 | 0.49998  | 0.07068  |
| H  | -6.51550 | 0.04803  | 1.06283  |
| H  | -6.27957 | 1.57800  | 0.19639  |

|    |          |          |          |
|----|----------|----------|----------|
| O  | -4.07586 | 0.20817  | 0.16359  |
| O  | -7.54037 | 0.21152  | -0.74147 |
| Si | 1.10185  | -0.00636 | 0.97158  |
| C  | 0.97830  | -0.55684 | 2.73925  |
| H  | 0.13594  | -0.07828 | 3.24026  |
| H  | 0.84210  | -1.63795 | 2.79934  |
| H  | 1.88685  | -0.29574 | 3.28274  |
| H  | -8.32372 | 0.57539  | -0.33297 |
| O  | -3.25136 | -2.85236 | 0.55414  |
| H  | -3.70667 | -2.29665 | 1.20454  |

gas\_TriSil-1n-dH-OH-IRC-forward-reactant.log      Energy: -1080579.3275673

|    |          |          |          |
|----|----------|----------|----------|
| C  | 0.10653  | -1.34048 | -0.12462 |
| H  | 0.10008  | -2.43365 | -0.09378 |
| H  | 0.06695  | -1.00923 | 0.91813  |
| O  | -2.73177 | -1.50351 | -0.22825 |
| O  | -1.62436 | 0.85642  | -0.77398 |
| Si | -3.97330 | -1.02411 | 0.75605  |
| Si | -1.02107 | 2.25284  | -0.13842 |
| C  | -4.96023 | -2.55468 | 1.15283  |
| H  | -4.34198 | -3.29367 | 1.66435  |
| H  | -5.80831 | -2.31787 | 1.79793  |
| H  | -5.34657 | -3.01216 | 0.24102  |
| C  | -5.02459 | 0.23709  | -0.13186 |
| H  | -5.84215 | 0.58513  | 0.50227  |
| H  | -4.42121 | 1.09960  | -0.41716 |
| H  | -5.45892 | -0.18720 | -1.03847 |
| C  | -3.26653 | -0.28249 | 2.32055  |
| H  | -2.59030 | -0.98295 | 2.81342  |
| H  | -2.70943 | 0.62884  | 2.10103  |
| H  | -4.05915 | -0.02687 | 3.02619  |
| C  | -0.01537 | 3.11799  | -1.45102 |
| H  | -0.62325 | 3.31912  | -2.33424 |
| H  | 0.37057  | 4.07024  | -1.08238 |
| H  | 0.83664  | 2.51048  | -1.76067 |
| C  | 0.05260  | 1.89914  | 1.35237  |
| H  | 0.95986  | 1.35980  | 1.07762  |
| H  | 0.35654  | 2.83732  | 1.82109  |
| H  | -0.47726 | 1.31024  | 2.10234  |
| C  | -2.48330 | 3.29936  | 0.35930  |

|    |          |          |          |
|----|----------|----------|----------|
| H  | -3.12770 | 3.49359  | -0.49954 |
| H  | -3.08437 | 2.80293  | 1.12268  |
| H  | -2.15778 | 4.26088  | 0.76039  |
| C  | 1.38766  | -0.83738 | -0.79466 |
| H  | 1.50244  | -1.28865 | -1.78211 |
| H  | 1.34708  | 0.24300  | -0.95369 |
| C  | 2.62063  | -1.14643 | 0.02785  |
| H  | 2.53924  | -0.67873 | 1.01888  |
| H  | 2.71230  | -2.22982 | 0.18367  |
| C  | 4.95007  | -0.88359 | 0.06272  |
| H  | 5.12166  | -1.95636 | 0.21483  |
| H  | 4.91578  | -0.40584 | 1.05123  |
| C  | 6.08024  | -0.29614 | -0.75503 |
| H  | 6.10853  | -0.77670 | -1.73531 |
| H  | 5.91451  | 0.77512  | -0.89097 |
| O  | 3.76018  | -0.65558 | -0.64245 |
| O  | 7.29021  | -0.53866 | -0.04181 |
| Si | -1.46446 | -0.76495 | -0.95280 |
| C  | -1.48463 | -1.15988 | -2.76567 |
| H  | -0.64969 | -0.68106 | -3.27928 |
| H  | -1.41867 | -2.23577 | -2.93291 |
| H  | -2.41002 | -0.80195 | -3.21834 |
| H  | 8.02657  | -0.19534 | -0.54602 |
| O  | 6.94463  | 0.38630  | 2.63387  |
| H  | 7.18206  | 0.04977  | 1.74441  |

gas\_TriSil-1n-dH-OH-opt-product.log

Energy: -1080605.4019349

|    |          |          |          |
|----|----------|----------|----------|
| C  | -0.05631 | -1.62912 | 0.11188  |
| H  | 0.14025  | -2.70317 | 0.16107  |
| H  | 0.05208  | -1.34537 | -0.94004 |
| O  | 2.73107  | -1.27974 | 0.56836  |
| O  | 1.17138  | 0.87880  | 0.72468  |
| Si | 3.84416  | -0.79389 | -0.55678 |
| Si | 0.45705  | 2.15016  | -0.05535 |
| C  | 5.05114  | -2.19956 | -0.76310 |
| H  | 4.54464  | -3.09952 | -1.11458 |
| H  | 5.82895  | -1.94476 | -1.48537 |
| H  | 5.53544  | -2.43435 | 0.18574  |
| C  | 4.70880  | 0.74147  | 0.05480  |
| H  | 5.41882  | 1.11858  | -0.68357 |

|    |          |          |          |
|----|----------|----------|----------|
| H  | 3.98146  | 1.52657  | 0.26245  |
| H  | 5.25656  | 0.53553  | 0.97568  |
| C  | 2.96866  | -0.44822 | -2.17421 |
| H  | 2.44110  | -1.33571 | -2.52830 |
| H  | 2.24009  | 0.35533  | -2.05954 |
| H  | 3.67738  | -0.14804 | -2.94816 |
| C  | -0.58439 | 3.09266  | 1.16477  |
| H  | -0.01143 | 3.33895  | 2.05989  |
| H  | -0.93948 | 4.02562  | 0.72242  |
| H  | -1.46639 | 2.51922  | 1.45346  |
| C  | -0.60925 | 1.54852  | -1.47020 |
| H  | -1.53135 | 1.09759  | -1.10099 |
| H  | -0.89624 | 2.39771  | -2.09399 |
| H  | -0.08866 | 0.83110  | -2.10644 |
| C  | 1.83897  | 3.22197  | -0.71305 |
| H  | 2.47831  | 3.57188  | 0.09911  |
| H  | 2.46521  | 2.67959  | -1.42306 |
| H  | 1.43493  | 4.09871  | -1.22270 |
| C  | -1.47386 | -1.31848 | 0.59806  |
| H  | -1.65533 | -1.78800 | 1.56672  |
| H  | -1.59949 | -0.24254 | 0.74083  |
| C  | -2.51994 | -1.78847 | -0.38796 |
| H  | -2.36532 | -1.30593 | -1.35780 |
| H  | -2.47520 | -2.87263 | -0.52625 |
| C  | -4.83950 | -1.61402 | -0.75316 |
| H  | -4.59661 | -1.85557 | -1.78101 |
| H  | -3.66689 | 0.54798  | 0.92089  |
| C  | -6.10306 | -0.94753 | -0.39650 |
| H  | -6.93129 | -1.45995 | -0.89127 |
| H  | -6.24904 | -0.99800 | 0.68615  |
| O  | -3.81214 | -1.43169 | 0.10226  |
| O  | -6.07448 | 0.43266  | -0.82092 |
| Si | 1.27418  | -0.71690 | 1.05800  |
| C  | 1.12016  | -0.96630 | 2.88942  |
| H  | 0.15783  | -0.60260 | 3.25259  |
| H  | 1.21016  | -2.02164 | 3.15031  |
| H  | 1.90607  | -0.41937 | 3.41119  |
| H  | -6.91001 | 0.83921  | -0.58635 |
| O  | -3.76042 | 1.46942  | 0.66931  |
| H  | -4.49372 | 1.42935  | 0.04476  |

gas\_TriSil-1n-dH-OH-radical.log Energy: -1032630.6100406

|    |          |          |          |
|----|----------|----------|----------|
| C  | -0.50726 | -1.31099 | -0.00177 |
| H  | -0.51346 | -2.40459 | 0.00952  |
| H  | -0.37195 | -1.02069 | -1.04861 |
| O  | 2.30683  | -1.50516 | 0.35957  |
| O  | 1.19382  | 0.88817  | 0.71747  |
| Si | 3.64015  | -1.08204 | -0.52570 |
| Si | 0.67216  | 2.26745  | -0.02038 |
| C  | 4.62956  | -2.64146 | -0.77699 |
| H  | 4.04608  | -3.38924 | -1.31585 |
| H  | 5.53647  | -2.44181 | -1.35070 |
| H  | 4.92380  | -3.07082 | 0.18166  |
| C  | 4.63158  | 0.19512  | 0.40707  |
| H  | 5.50892  | 0.50584  | -0.16337 |
| H  | 4.02220  | 1.07747  | 0.60573  |
| H  | 4.97534  | -0.20144 | 1.36371  |
| C  | 3.08965  | -0.38857 | -2.17294 |
| H  | 2.44621  | -1.09592 | -2.69878 |
| H  | 2.53356  | 0.53959  | -2.03744 |
| H  | 3.94677  | -0.17298 | -2.81354 |
| C  | -0.43565 | 3.19215  | 1.16255  |
| H  | 0.09233  | 3.41854  | 2.08993  |
| H  | -0.77218 | 4.13464  | 0.72660  |
| H  | -1.32163 | 2.60706  | 1.41463  |
| C  | -0.26552 | 1.86937  | -1.58967 |
| H  | -1.20314 | 1.35304  | -1.38051 |
| H  | -0.50990 | 2.79228  | -2.11952 |
| H  | 0.32194  | 1.24512  | -2.26438 |
| C  | 2.18989  | 3.27627  | -0.41988 |
| H  | 2.75402  | 3.49853  | 0.48728  |
| H  | 2.85215  | 2.74187  | -1.10277 |
| H  | 1.91784  | 4.22400  | -0.88798 |
| C  | -1.83480 | -0.76898 | 0.53404  |
| H  | -2.03776 | -1.17493 | 1.52697  |
| H  | -1.79565 | 0.31705  | 0.64781  |
| C  | -2.99276 | -1.10817 | -0.37891 |
| H  | -2.83494 | -0.68016 | -1.37463 |
| H  | -3.09049 | -2.19415 | -0.48929 |
| C  | -5.30666 | -0.81258 | -0.54710 |

|    |          |          |          |
|----|----------|----------|----------|
| C  | -6.55938 | -0.34470 | 0.09351  |
| H  | -6.85147 | -1.01316 | 0.91938  |
| H  | -6.38882 | 0.64874  | 0.52470  |
| O  | -4.18783 | -0.57909 | 0.17393  |
| O  | -7.57394 | -0.31902 | -0.89633 |
| Si | 0.99346  | -0.72258 | 0.94119  |
| C  | 0.84523  | -1.04956 | 2.76142  |
| H  | -0.02370 | -0.54059 | 3.18109  |
| H  | 0.74664  | -2.11747 | 2.96077  |
| H  | 1.73262  | -0.68765 | 3.28193  |
| H  | -8.42093 | -0.23060 | -0.46242 |
| H  | -5.31603 | -1.67375 | -1.20854 |

gas\_TriSil-1n-dH-OH-TS.log Energy: -1080577.6378412

|    |          |          |          |
|----|----------|----------|----------|
| C  | -0.16207 | -1.37045 | 0.08077  |
| H  | -0.14150 | -2.46229 | 0.02340  |
| H  | -0.10637 | -1.01248 | -0.95226 |
| O  | 2.67559  | -1.49906 | 0.23972  |
| O  | 1.52286  | 0.83285  | 0.81796  |
| Si | 3.92887  | -0.98359 | -0.71114 |
| Si | 0.91620  | 2.23446  | 0.19464  |
| C  | 4.94450  | -2.49280 | -1.11759 |
| H  | 4.34676  | -3.22987 | -1.65557 |
| H  | 5.80172  | -2.23195 | -1.74099 |
| H  | 5.31918  | -2.96279 | -0.20727 |
| C  | 4.94557  | 0.27377  | 0.22140  |
| H  | 5.77059  | 0.64445  | -0.38982 |
| H  | 4.32556  | 1.12288  | 0.51111  |
| H  | 5.36781  | -0.16235 | 1.12812  |
| C  | 3.24211  | -0.22158 | -2.27450 |
| H  | 2.58706  | -0.92208 | -2.79510 |
| H  | 2.66640  | 0.67654  | -2.04875 |
| H  | 4.04476  | 0.06034  | -2.95846 |
| C  | -0.12195 | 3.06460  | 1.50448  |
| H  | 0.46732  | 3.25512  | 2.40254  |
| H  | -0.51084 | 4.01953  | 1.14607  |
| H  | -0.97375 | 2.44348  | 1.78641  |
| C  | -0.12459 | 1.89692  | -1.32196 |
| H  | -1.03578 | 1.35054  | -1.07601 |
| H  | -0.42428 | 2.84021  | -1.78298 |

|    |          |          |          |
|----|----------|----------|----------|
| H  | 0.42331  | 1.32239  | -2.07012 |
| C  | 2.37720  | 3.30474  | -0.25464 |
| H  | 3.00284  | 3.48941  | 0.62005  |
| H  | 2.99803  | 2.82912  | -1.01545 |
| H  | 2.04907  | 4.27016  | -0.64403 |
| C  | -1.46190 | -0.89821 | 0.73721  |
| H  | -1.59465 | -1.38056 | 1.70762  |
| H  | -1.43411 | 0.17710  | 0.92903  |
| C  | -2.67051 | -1.19067 | -0.12490 |
| H  | -2.57773 | -0.68693 | -1.09467 |
| H  | -2.75684 | -2.26777 | -0.31567 |
| C  | -4.99144 | -0.90069 | -0.19882 |
| H  | -5.11736 | -1.93361 | -0.54615 |
| H  | -4.95787 | -0.26166 | -1.15619 |
| C  | -6.17513 | -0.43170 | 0.61337  |
| H  | -6.31754 | -1.09128 | 1.47432  |
| H  | -5.97610 | 0.58071  | 0.97404  |
| O  | -3.83372 | -0.72644 | 0.53610  |
| O  | -7.30530 | -0.46220 | -0.24543 |
| Si | 1.38411  | -0.79382 | 0.95457  |
| C  | 1.37196  | -1.23295 | 2.75742  |
| H  | 0.51994  | -0.77822 | 3.26487  |
| H  | 1.31793  | -2.31344 | 2.89708  |
| H  | 2.28254  | -0.87361 | 3.23815  |
| H  | -8.07561 | -0.17156 | 0.23983  |
| O  | -5.45437 | 0.60166  | -2.31162 |
| H  | -6.38197 | 0.48146  | -2.05338 |

gas\_TriSil-1n-eH-OH-IRC-forward-product.log      Energy: -1080602.6984044

|    |          |          |          |
|----|----------|----------|----------|
| C  | -0.13215 | -1.24483 | 0.40764  |
| H  | -0.06439 | -2.31880 | 0.60894  |
| H  | 0.01930  | -1.12846 | -0.66880 |
| O  | 2.69662  | -0.91444 | 0.67334  |
| O  | 1.12327  | 1.22936  | 1.10921  |
| Si | 3.53680  | -1.34373 | -0.67724 |
| Si | 0.87331  | 2.40049  | -0.03308 |
| C  | 4.86842  | -2.52986 | -0.13203 |
| H  | 4.43225  | -3.42294 | 0.31788  |
| H  | 5.48646  | -2.84315 | -0.97538 |
| H  | 5.51880  | -2.06417 | 0.60969  |



|    |          |          |          |
|----|----------|----------|----------|
| C  | 4.29820  | 0.17767  | -1.44624 |
| H  | 4.94085  | -0.09607 | -2.28536 |
| H  | 3.53344  | 0.85887  | -1.82150 |
| H  | 4.90485  | 0.71883  | -0.71877 |
| C  | 2.40788  | -2.17424 | -1.91667 |
| H  | 1.86803  | -3.00725 | -1.46396 |
| H  | 1.67350  | -1.47900 | -2.32610 |
| H  | 2.99229  | -2.56653 | -2.75147 |
| C  | -0.52942 | 3.47954  | 0.54501  |
| H  | -0.35236 | 3.83593  | 1.56082  |
| H  | -0.63592 | 4.35010  | -0.10568 |
| H  | -1.47300 | 2.93235  | 0.51932  |
| C  | 0.43053  | 1.61104  | -1.67063 |
| H  | -0.55693 | 1.14890  | -1.61832 |
| H  | 0.39326  | 2.36887  | -2.45565 |
| H  | 1.15825  | 0.85610  | -1.97349 |
| C  | 2.44639  | 3.39609  | -0.17778 |
| H  | 2.68452  | 3.86971  | 0.77597  |
| H  | 3.29144  | 2.76748  | -0.45909 |
| H  | 2.34320  | 4.18259  | -0.92782 |
| C  | -1.51398 | -0.71229 | 0.79013  |
| H  | -1.70662 | -0.85924 | 1.85511  |
| H  | -1.56340 | 0.36291  | 0.60787  |
| C  | -2.61356 | -1.38464 | -0.00464 |
| H  | -2.42250 | -1.27336 | -1.07955 |
| H  | -2.65623 | -2.45721 | 0.22131  |
| C  | -4.94244 | -1.36104 | -0.37349 |
| H  | -4.98557 | -2.43931 | -0.14596 |
| H  | -4.81548 | -1.26452 | -1.46006 |
| C  | -6.18127 | -0.66172 | 0.04456  |
| H  | -6.37169 | -0.47505 | 1.09557  |
| H  | -4.00092 | 2.25697  | -1.11304 |
| O  | -3.85650 | -0.78077 | 0.31652  |
| O  | -7.24697 | -0.88781 | -0.77271 |
| Si | 1.27677  | -0.38596 | 1.29116  |
| C  | 1.27730  | -0.74495 | 3.11106  |
| H  | 0.35161  | -0.40270 | 3.57550  |
| H  | 1.38399  | -1.81384 | 3.30025  |
| H  | 2.10738  | -0.22960 | 3.59528  |
| H  | -8.03591 | -0.50450 | -0.39119 |

|   |          |         |          |
|---|----------|---------|----------|
| O | -3.25805 | 1.68950 | -0.91333 |
| H | -3.62126 | 0.95344 | -0.39973 |

gas\_TriSil-1n-eH-OH-IRC-reverse-reactant.log

Energy: -1080580.3683733

|    |          |          |          |
|----|----------|----------|----------|
| C  | -0.11928 | -1.17103 | 0.34119  |
| H  | -0.09234 | -2.23183 | 0.60999  |
| H  | 0.08388  | -1.12973 | -0.73265 |
| O  | 2.68297  | -1.08448 | 0.82227  |
| O  | 1.35853  | 1.25193  | 0.82484  |
| Si | 3.62826  | -1.43569 | -0.48442 |
| Si | 0.95717  | 2.39992  | -0.29276 |
| C  | 4.96815  | -2.58237 | 0.11721  |
| H  | 4.53946  | -3.49733 | 0.52844  |
| H  | 5.64279  | -2.85943 | -0.69479 |
| H  | 5.55903  | -2.10665 | 0.90107  |
| C  | 4.36168  | 0.13685  | -1.17269 |
| H  | 5.09283  | -0.08521 | -1.95237 |
| H  | 3.58821  | 0.76776  | -1.61176 |
| H  | 4.86054  | 0.71100  | -0.39109 |
| C  | 2.60137  | -2.27046 | -1.80728 |
| H  | 2.06964  | -3.13528 | -1.40776 |
| H  | 1.86377  | -1.58697 | -2.23144 |
| H  | 3.23908  | -2.61507 | -2.62375 |
| C  | -0.46054 | 3.41797  | 0.35733  |
| H  | -0.20718 | 3.84131  | 1.33079  |
| H  | -0.67346 | 4.24757  | -0.32030 |
| H  | -1.38094 | 2.84287  | 0.46763  |
| C  | 0.47748  | 1.56559  | -1.90039 |
| H  | -0.44470 | 0.99289  | -1.78851 |
| H  | 0.31097  | 2.31058  | -2.68061 |
| H  | 1.25834  | 0.88731  | -2.24960 |
| C  | 2.44931  | 3.49142  | -0.54305 |
| H  | 2.73485  | 3.96096  | 0.39961  |
| H  | 3.30795  | 2.92937  | -0.90993 |
| H  | 2.23095  | 4.28506  | -1.26019 |
| C  | -1.50228 | -0.58818 | 0.63371  |
| H  | -1.73765 | -0.67078 | 1.69697  |
| H  | -1.52653 | 0.47695  | 0.39291  |
| C  | -2.58432 | -1.29190 | -0.15858 |
| H  | -2.38817 | -1.20232 | -1.23467 |

|    |          |          |          |
|----|----------|----------|----------|
| H  | -2.60486 | -2.36005 | 0.08805  |
| C  | -4.91674 | -1.33593 | -0.53601 |
| H  | -4.96437 | -2.39906 | -0.27829 |
| H  | -4.78422 | -1.25253 | -1.62015 |
| C  | -6.20034 | -0.65017 | -0.11873 |
| H  | -6.31089 | -0.72356 | 0.96761  |
| H  | -6.15459 | 0.40903  | -0.38841 |
| O  | -3.84415 | -0.71704 | 0.14447  |
| O  | -7.25178 | -1.31394 | -0.79347 |
| Si | 1.29334  | -0.32736 | 1.23567  |
| C  | 1.10725  | -0.43777 | 3.07699  |
| H  | 0.19507  | 0.06061  | 3.40771  |
| H  | 1.07197  | -1.47690 | 3.40648  |
| H  | 1.95191  | 0.04564  | 3.56878  |
| H  | -8.07466 | -0.86638 | -0.60459 |
| O  | -3.91637 | 2.07775  | 0.34485  |
| H  | -3.88352 | 1.09609  | 0.31419  |

gas\_TriSil-1n-eH-OH-radical.log      Energy: -1032629.9933494

|    |          |          |          |
|----|----------|----------|----------|
| C  | -0.36936 | -1.11903 | 0.34721  |
| H  | -0.36376 | -2.18732 | 0.58572  |
| H  | -0.18165 | -1.05402 | -0.72857 |
| O  | 2.44608  | -1.10117 | 0.79098  |
| O  | 1.17305  | 1.25821  | 0.85965  |
| Si | 3.36863  | -1.40944 | -0.54226 |
| Si | 0.74431  | 2.43661  | -0.21080 |
| C  | 4.71139  | -2.58443 | -0.00460 |
| H  | 4.28366  | -3.51138 | 0.37990  |
| H  | 5.37127  | -2.83539 | -0.83696 |
| H  | 5.31752  | -2.14087 | 0.78646  |
| C  | 4.10118  | 0.18412  | -1.18299 |
| H  | 4.81740  | -0.01176 | -1.98326 |
| H  | 3.32391  | 0.83553  | -1.58373 |
| H  | 4.61652  | 0.72523  | -0.38860 |
| C  | 2.31638  | -2.18831 | -1.87875 |
| H  | 1.78642  | -3.06474 | -1.50298 |
| H  | 1.57496  | -1.48601 | -2.26367 |
| H  | 2.93830  | -2.50482 | -2.71847 |
| C  | -0.66532 | 3.42846  | 0.50592  |
| H  | -0.38260 | 3.85027  | 1.47163  |

|    |          |          |          |
|----|----------|----------|----------|
| H  | -0.92835 | 4.25523  | -0.15697 |
| H  | -1.56005 | 2.82273  | 0.65325  |
| C  | 0.22551  | 1.66288  | -1.83495 |
| H  | -0.69546 | 1.08829  | -1.72401 |
| H  | 0.04607  | 2.43553  | -2.58489 |
| H  | 0.99662  | 0.99534  | -2.22408 |
| C  | 2.22140  | 3.54896  | -0.45552 |
| H  | 2.53327  | 3.97817  | 0.49790  |
| H  | 3.07096  | 3.00772  | -0.87180 |
| H  | 1.97873  | 4.37145  | -1.13112 |
| C  | -1.73352 | -0.51173 | 0.67801  |
| H  | -1.96539 | -0.64099 | 1.73722  |
| H  | -1.73065 | 0.56397  | 0.49218  |
| C  | -2.84794 | -1.12879 | -0.14137 |
| H  | -2.64367 | -0.99402 | -1.21345 |
| H  | -2.90331 | -2.21048 | 0.04594  |
| C  | -5.15551 | -1.02356 | -0.52748 |
| H  | -5.22349 | -2.11739 | -0.38477 |
| H  | -5.02799 | -0.85412 | -1.60661 |
| C  | -6.38887 | -0.34662 | -0.05921 |
| H  | -6.52623 | -0.14544 | 0.99735  |
| O  | -4.06674 | -0.51291 | 0.19854  |
| O  | -7.49127 | -0.63112 | -0.81081 |
| Si | 1.07359  | -0.33088 | 1.23915  |
| C  | 0.91507  | -0.47174 | 3.08108  |
| H  | 0.01515  | 0.03343  | 3.43431  |
| H  | 0.86757  | -1.51632 | 3.39118  |
| H  | 1.77470  | -0.01120 | 3.56887  |
| H  | -8.26346 | -0.23002 | -0.41430 |

gas\_TriSil-1n-eH-OH-TS.log Energy: -1080576.7938660

|    |         |          |          |
|----|---------|----------|----------|
| C  | 0.01077 | -1.26665 | 0.38438  |
| H  | 0.09731 | -2.33009 | 0.62798  |
| H  | 0.17609 | -1.19327 | -0.69441 |
| O  | 2.82317 | -1.02480 | 0.76220  |
| O  | 1.36370 | 1.22477  | 0.87483  |
| Si | 3.74157 | -1.24439 | -0.59245 |
| Si | 0.82232 | 2.37492  | -0.17649 |
| C  | 5.17950 | -2.31980 | -0.09525 |
| H  | 4.83111 | -3.28173 | 0.28330  |

|    |          |          |          |
|----|----------|----------|----------|
| H  | 5.84110  | -2.50861 | -0.94250 |
| H  | 5.76456  | -1.84136 | 0.69131  |
| C  | 4.33588  | 0.40910  | -1.22313 |
| H  | 5.04497  | 0.27999  | -2.04302 |
| H  | 3.50190  | 1.00530  | -1.59461 |
| H  | 4.82829  | 0.97603  | -0.43223 |
| C  | 2.72496  | -2.08534 | -1.91898 |
| H  | 2.27233  | -3.00506 | -1.54545 |
| H  | 1.92410  | -1.43770 | -2.28005 |
| H  | 3.35208  | -2.34233 | -2.77495 |
| C  | -0.65077 | 3.24093  | 0.57481  |
| H  | -0.38176 | 3.69108  | 1.53155  |
| H  | -1.00495 | 4.03729  | -0.08257 |
| H  | -1.48540 | 2.56138  | 0.74951  |
| C  | 0.34134  | 1.57314  | -1.79868 |
| H  | -0.52498 | 0.92046  | -1.67948 |
| H  | 0.08193  | 2.33394  | -2.53712 |
| H  | 1.15976  | 0.97819  | -2.20833 |
| C  | 2.19803  | 3.60686  | -0.43394 |
| H  | 2.48879  | 4.05285  | 0.51843  |
| H  | 3.08260  | 3.14177  | -0.86885 |
| H  | 1.87660  | 4.41176  | -1.09767 |
| C  | -1.38725 | -0.75610 | 0.73435  |
| H  | -1.59495 | -0.89767 | 1.79692  |
| H  | -1.45756 | 0.31729  | 0.54612  |
| C  | -2.46753 | -1.44711 | -0.07055 |
| H  | -2.28316 | -1.31105 | -1.14472 |
| H  | -2.46632 | -2.52593 | 0.13124  |
| C  | -4.78879 | -1.43820 | -0.46459 |
| H  | -4.89123 | -2.51187 | -0.26523 |
| H  | -4.63115 | -1.30282 | -1.54077 |
| C  | -6.04632 | -0.71025 | -0.05368 |
| H  | -6.26787 | -0.85219 | 1.00799  |
| H  | -5.82722 | 0.42216  | -0.17229 |
| O  | -3.72088 | -0.89390 | 0.27225  |
| O  | -7.08870 | -1.10804 | -0.88692 |
| Si | 1.40728  | -0.36725 | 1.24819  |
| C  | 1.30100  | -0.52904 | 3.09184  |
| H  | 0.37088  | -0.10109 | 3.46823  |
| H  | 1.34711  | -1.57517 | 3.39684  |

|   |          |          |          |
|---|----------|----------|----------|
| H | 2.13011  | -0.00100 | 3.56379  |
| H | -7.90937 | -0.73160 | -0.57125 |
| O | -5.04218 | 1.68288  | -0.14935 |
| H | -4.22788 | 1.22261  | 0.10908  |

gas\_TriSil-1n-fH-OH-opt-product.log Energy: -1080592.3039799

|    |          |          |          |
|----|----------|----------|----------|
| C  | -0.06478 | -0.88726 | 0.61113  |
| H  | -0.15204 | -1.90202 | 1.01210  |
| H  | 0.04999  | -1.00425 | -0.47033 |
| O  | 2.76536  | -1.10622 | 0.87640  |
| O  | 1.72882  | 1.36217  | 0.68384  |
| Si | 3.54758  | -1.72677 | -0.43783 |
| Si | 1.37962  | 2.39942  | -0.54885 |
| C  | 4.77913  | -2.96670 | 0.20865  |
| H  | 4.27460  | -3.76439 | 0.75560  |
| H  | 5.34554  | -3.42065 | -0.60643 |
| H  | 5.48656  | -2.48922 | 0.88795  |
| C  | 4.41509  | -0.35293 | -1.35809 |
| H  | 5.04820  | -0.75675 | -2.15047 |
| H  | 3.69527  | 0.32345  | -1.82017 |
| H  | 5.04305  | 0.23235  | -0.68530 |
| C  | 2.31982  | -2.55983 | -1.57704 |
| H  | 1.72263  | -3.29876 | -1.04078 |
| H  | 1.63665  | -1.83800 | -2.02781 |
| H  | 2.84020  | -3.07256 | -2.38844 |
| C  | 0.12525  | 3.64674  | 0.04839  |
| H  | 0.50302  | 4.18035  | 0.92183  |
| H  | -0.08509 | 4.38326  | -0.72968 |
| H  | -0.81841 | 3.17557  | 0.32574  |
| C  | 0.69055  | 1.44933  | -2.00770 |
| H  | -0.27767 | 1.00549  | -1.77023 |
| H  | 0.55021  | 2.11361  | -2.86249 |
| H  | 1.36311  | 0.64762  | -2.31802 |
| C  | 2.95430  | 3.27969  | -1.02125 |
| H  | 3.35831  | 3.81857  | -0.16285 |
| H  | 3.71769  | 2.58298  | -1.36745 |
| H  | 2.76998  | 4.00421  | -1.81678 |
| C  | -1.33164 | -0.08794 | 0.91981  |
| H  | -1.49212 | -0.02318 | 1.99805  |
| H  | -1.23448 | 0.93826  | 0.55989  |

|    |          |          |          |
|----|----------|----------|----------|
| C  | -2.56115 | -0.69990 | 0.28207  |
| H  | -2.43341 | -0.75620 | -0.80767 |
| H  | -2.71061 | -1.72474 | 0.64680  |
| C  | -4.87647 | -0.40314 | 0.03427  |
| H  | -5.09584 | -1.41595 | 0.39210  |
| H  | -4.81628 | -0.44792 | -1.05957 |
| C  | -5.98640 | 0.54582  | 0.45316  |
| H  | -6.03837 | 0.63339  | 1.55343  |
| H  | -5.76300 | 1.58094  | 0.13787  |
| O  | -3.68725 | 0.09129  | 0.59269  |
| O  | -7.22666 | 0.23205  | 0.00314  |
| Si | 1.51118  | -0.14229 | 1.29080  |
| C  | 1.47716  | -0.01099 | 3.13985  |
| H  | 0.65996  | 0.63140  | 3.47050  |
| H  | 1.35181  | -0.99192 | 3.59983  |
| H  | 2.41165  | 0.41753  | 3.50331  |
| H  | -7.27494 | -1.40104 | -1.08832 |
| O  | -7.02754 | -2.19957 | -1.56991 |
| H  | -7.84043 | -2.54158 | -1.93876 |

gas\_TriSil-1n-fH-OH-opt-reactant.log

Energy: -1080576.6841334

|    |         |          |          |
|----|---------|----------|----------|
| C  | 0.15670 | -1.17260 | 0.36865  |
| H  | 0.21158 | -2.24511 | 0.58034  |
| H  | 0.30239 | -1.07499 | -0.71116 |
| O  | 2.98231 | -1.06506 | 0.71753  |
| O  | 1.63359 | 1.24694  | 0.87554  |
| Si | 3.87163 | -1.30313 | -0.65264 |
| Si | 1.11948 | 2.43597  | -0.14401 |
| C  | 5.27665 | -2.43590 | -0.18936 |
| H  | 4.89894 | -3.38836 | 0.18499  |
| H  | 5.91770 | -2.63980 | -1.04884 |
| H  | 5.89100 | -1.98768 | 0.59268  |
| C  | 4.51737 | 0.33421  | -1.27567 |
| H  | 5.20931 | 0.18810  | -2.10729 |
| H  | 3.70020 | 0.96409  | -1.62854 |
| H  | 5.04132 | 0.87456  | -0.48645 |
| C  | 2.80529 | -2.09079 | -1.97283 |
| H  | 2.32279 | -2.99613 | -1.60164 |
| H  | 2.02472 | -1.40911 | -2.31515 |
| H  | 3.40982 | -2.36263 | -2.84040 |

|    |          |          |          |
|----|----------|----------|----------|
| C  | -0.29807 | 3.35235  | 0.65321  |
| H  | 0.00708  | 3.76286  | 1.61694  |
| H  | -0.62110 | 4.18297  | 0.02244  |
| H  | -1.16107 | 2.70741  | 0.82192  |
| C  | 0.56700  | 1.68504  | -1.76802 |
| H  | -0.32480 | 1.06996  | -1.63729 |
| H  | 0.32677  | 2.46919  | -2.48843 |
| H  | 1.34809  | 1.06037  | -2.20545 |
| C  | 2.54204  | 3.61117  | -0.41422 |
| H  | 2.87622  | 4.02526  | 0.53830  |
| H  | 3.39376  | 3.11560  | -0.87999 |
| H  | 2.24091  | 4.44225  | -1.05486 |
| C  | -1.21639 | -0.62687 | 0.76322  |
| H  | -1.40381 | -0.78932 | 1.82658  |
| H  | -1.26183 | 0.45205  | 0.60342  |
| C  | -2.33536 | -1.26885 | -0.03014 |
| H  | -2.17677 | -1.10220 | -1.10531 |
| H  | -2.34384 | -2.35511 | 0.13428  |
| C  | -4.66298 | -1.24289 | -0.32474 |
| H  | -4.73600 | -2.32712 | -0.17365 |
| H  | -4.56307 | -1.06335 | -1.40552 |
| C  | -5.91750 | -0.56614 | 0.19751  |
| H  | -6.03311 | -0.77688 | 1.25897  |
| H  | -5.84156 | 0.51563  | 0.07267  |
| O  | -3.56576 | -0.70927 | 0.36687  |
| O  | -7.07705 | -1.07557 | -0.44381 |
| Si | 1.60169  | -0.35105 | 1.22770  |
| C  | 1.50974  | -0.53211 | 3.07043  |
| H  | 0.60604  | -0.06442 | 3.46345  |
| H  | 1.50749  | -1.58332 | 3.36111  |
| H  | 2.36949  | -0.05204 | 3.53877  |
| H  | -7.10353 | -0.75245 | -1.34602 |
| O  | -8.59002 | 0.81434  | -0.75704 |
| H  | -9.06576 | 0.22392  | -0.15646 |

gas\_TriSil-1n-fH-OH-radical.log      Energy: -1032622.4995874

|   |          |          |          |
|---|----------|----------|----------|
| C | -0.37662 | -1.12620 | 0.33115  |
| H | -0.36945 | -2.19522 | 0.56617  |
| H | -0.18099 | -1.05678 | -0.74290 |
| O | 2.43493  | -1.09971 | 0.79210  |



|    |          |          |          |
|----|----------|----------|----------|
| O  | 1.15069  | 1.25452  | 0.86740  |
| Si | 3.36944  | -1.40113 | -0.53492 |
| Si | 0.73461  | 2.43635  | -0.20402 |
| C  | 4.70800  | -2.57780 | 0.00843  |
| H  | 4.27771  | -3.50695 | 0.38463  |
| H  | 5.37516  | -2.82420 | -0.81947 |
| H  | 5.30708  | -2.13781 | 0.80679  |
| C  | 4.10533  | 0.19659  | -1.16085 |
| H  | 4.82734  | 0.00591  | -1.95713 |
| H  | 3.33069  | 0.85009  | -1.56328 |
| H  | 4.61491  | 0.73307  | -0.35963 |
| C  | 2.32797  | -2.17378 | -1.88343 |
| H  | 1.79616  | -3.05282 | -1.51642 |
| H  | 1.58894  | -1.47018 | -2.27061 |
| H  | 2.95657  | -2.48536 | -2.71998 |
| C  | -0.68648 | 3.42189  | 0.49941  |
| H  | -0.41581 | 3.84306  | 1.46881  |
| H  | -0.94597 | 4.24885  | -0.16462 |
| H  | -1.57996 | 2.81190  | 0.63683  |
| C  | 0.23522  | 1.66730  | -1.83664 |
| H  | -0.68416 | 1.08798  | -1.73716 |
| H  | 0.05995  | 2.44218  | -2.58525 |
| H  | 1.01284  | 1.00464  | -2.22097 |
| C  | 2.21151  | 3.55267  | -0.42701 |
| H  | 2.51003  | 3.98030  | 0.53136  |
| H  | 3.06767  | 3.01449  | -0.83358 |
| H  | 1.97567  | 4.37624  | -1.10369 |
| C  | -1.74498 | -0.52444 | 0.65417  |
| H  | -1.98272 | -0.65555 | 1.71183  |
| H  | -1.74469 | 0.55144  | 0.46887  |
| C  | -2.85104 | -1.14613 | -0.17259 |
| H  | -2.64363 | -1.00810 | -1.24313 |
| H  | -2.90364 | -2.22750 | 0.01340  |
| C  | -5.16382 | -1.04924 | -0.56748 |
| H  | -5.28837 | -2.12461 | -0.38907 |
| H  | -5.02012 | -0.90212 | -1.64528 |
| C  | -6.41058 | -0.30752 | -0.11233 |
| H  | -6.55155 | -0.41277 | 0.97791  |
| H  | -6.28730 | 0.78184  | -0.24483 |
| O  | -4.07841 | -0.53850 | 0.16083  |

|    |          |          |          |
|----|----------|----------|----------|
| O  | -7.55615 | -0.68535 | -0.72791 |
| Si | 1.05811  | -0.33720 | 1.23702  |
| C  | 0.88738  | -0.48958 | 3.07671  |
| H  | -0.01663 | 0.01004  | 3.42740  |
| H  | 0.84227  | -1.53610 | 3.38051  |
| H  | 1.74192  | -0.02852 | 3.57286  |

gas\_TriSil-1n-fH-OH-TS.log Energy: -1080572.4246368

|    |          |          |          |
|----|----------|----------|----------|
| C  | 0.06023  | -1.11555 | 0.49142  |
| H  | 0.08337  | -2.18245 | 0.73494  |
| H  | 0.15398  | -1.05720 | -0.59692 |
| O  | 2.90271  | -1.10794 | 0.69035  |
| O  | 1.64997  | 1.25788  | 0.85248  |
| Si | 3.70740  | -1.42040 | -0.71670 |
| Si | 1.13366  | 2.43581  | -0.17880 |
| C  | 5.08838  | -2.59786 | -0.29421 |
| H  | 4.69305  | -3.52329 | 0.12686  |
| H  | 5.67382  | -2.85151 | -1.17975 |
| H  | 5.76124  | -2.15484 | 0.44123  |
| C  | 4.38482  | 0.17120  | -1.41949 |
| H  | 5.02614  | -0.02602 | -2.28061 |
| H  | 3.57627  | 0.82460  | -1.74869 |
| H  | 4.97031  | 0.71056  | -0.67405 |
| C  | 2.54191  | -2.19861 | -1.95610 |
| H  | 2.04505  | -3.07367 | -1.53465 |
| H  | 1.77122  | -1.49546 | -2.27662 |
| H  | 3.08821  | -2.51745 | -2.84602 |
| C  | -0.20753 | 3.43108  | 0.65563  |
| H  | 0.15882  | 3.85565  | 1.59155  |
| H  | -0.52731 | 4.25598  | 0.01576  |
| H  | -1.08597 | 2.82625  | 0.88300  |
| C  | 0.47479  | 1.66096  | -1.75072 |
| H  | -0.43295 | 1.08636  | -1.55953 |
| H  | 0.23055  | 2.43271  | -2.48305 |
| H  | 1.20890  | 0.99291  | -2.20502 |
| C  | 2.58576  | 3.54553  | -0.55053 |
| H  | 2.97983  | 3.97368  | 0.37244  |
| H  | 3.39515  | 3.00328  | -1.03921 |
| H  | 2.28679  | 4.36879  | -1.20219 |
| C  | -1.26795 | -0.50168 | 0.93635  |

|    |          |          |          |
|----|----------|----------|----------|
| H  | -1.40580 | -0.62214 | 2.01285  |
| H  | -1.27868 | 0.57251  | 0.74210  |
| C  | -2.45105 | -1.12201 | 0.22302  |
| H  | -2.34415 | -0.99499 | -0.86348 |
| H  | -2.49309 | -2.20139 | 0.42356  |
| C  | -4.78719 | -1.00686 | 0.04097  |
| H  | -4.91018 | -2.07708 | 0.25054  |
| H  | -4.73066 | -0.87794 | -1.04759 |
| C  | -5.97558 | -0.23654 | 0.58409  |
| H  | -6.05132 | -0.36954 | 1.66650  |
| H  | -5.84526 | 0.83413  | 0.40199  |
| O  | -3.63635 | -0.50104 | 0.66490  |
| O  | -7.19692 | -0.68399 | 0.06012  |
| Si | 1.57823  | -0.32813 | 1.25043  |
| C  | 1.57773  | -0.45650 | 3.09997  |
| H  | 0.71492  | 0.05693  | 3.52633  |
| H  | 1.55087  | -1.49876 | 3.42020  |
| H  | 2.47906  | 0.00123  | 3.50874  |
| H  | -7.17340 | -0.73117 | -1.00368 |
| O  | -7.17307 | -0.09811 | -2.12131 |
| H  | -7.95558 | 0.46406  | -2.08118 |

gas\_TriSil-1n-gH-OH-radical.log Energy: -1032622.8411220

|    |          |          |          |
|----|----------|----------|----------|
| C  | -0.33898 | -1.10187 | 0.37224  |
| H  | -0.34530 | -2.16637 | 0.62651  |
| H  | -0.14226 | -1.05300 | -0.70318 |
| O  | 2.47003  | -1.09873 | 0.81144  |
| O  | 1.18956  | 1.27346  | 0.89654  |
| Si | 3.39579  | -1.43970 | -0.51219 |
| Si | 0.81202  | 2.43973  | -0.20740 |
| C  | 4.71146  | -2.63389 | 0.04860  |
| H  | 4.26322  | -3.54870 | 0.43875  |
| H  | 5.37329  | -2.90578 | -0.77561 |
| H  | 5.31916  | -2.19344 | 0.84016  |
| C  | 4.16338  | 0.13397  | -1.16057 |
| H  | 4.88184  | -0.08282 | -1.95340 |
| H  | 3.40338  | 0.79821  | -1.57327 |
| H  | 4.68374  | 0.67036  | -0.36621 |
| C  | 2.33814  | -2.21291 | -1.84728 |
| H  | 1.79164  | -3.07678 | -1.46615 |

|    |          |          |          |
|----|----------|----------|----------|
| H  | 1.61061  | -1.50267 | -2.24378 |
| H  | 2.95984  | -2.54806 | -2.67990 |
| C  | -0.60168 | 3.46222  | 0.45571  |
| H  | -0.33726 | 3.89956  | 1.41966  |
| H  | -0.83944 | 4.27869  | -0.22910 |
| H  | -1.50568 | 2.86804  | 0.59347  |
| C  | 0.32378  | 1.64706  | -1.83176 |
| H  | -0.60535 | 1.08331  | -1.73412 |
| H  | 0.17005  | 2.41089  | -2.59633 |
| H  | 1.09640  | 0.96647  | -2.19406 |
| C  | 2.31348  | 3.52307  | -0.42945 |
| H  | 2.60222  | 3.96864  | 0.52370  |
| H  | 3.16643  | 2.95848  | -0.80589 |
| H  | 2.10642  | 4.33358  | -1.13088 |
| C  | -1.69778 | -0.47570 | 0.68728  |
| H  | -1.92285 | -0.56554 | 1.75215  |
| H  | -1.68894 | 0.59265  | 0.46284  |
| C  | -2.81932 | -1.11539 | -0.10456 |
| H  | -2.61814 | -1.02448 | -1.18176 |
| H  | -2.88296 | -2.18802 | 0.12542  |
| C  | -5.13009 | -1.00782 | -0.48640 |
| H  | -5.25992 | -2.07432 | -0.26435 |
| H  | -4.98989 | -0.90537 | -1.56975 |
| C  | -6.36530 | -0.24513 | -0.05936 |
| H  | -6.50110 | -0.35617 | 1.02060  |
| H  | -6.22667 | 0.81718  | -0.28191 |
| O  | -4.03364 | -0.47866 | 0.21391  |
| O  | -7.45921 | -0.78660 | -0.77776 |
| Si | 1.10785  | -0.31729 | 1.26252  |
| C  | 0.96000  | -0.46212 | 3.08688  |
| H  | 0.49010  | 0.30052  | 3.69588  |
| H  | 1.30855  | -1.33142 | 3.63138  |
| H  | -8.25692 | -0.32668 | -0.52303 |

gas\_TriSil-1n-gH-OH-TS-IRC-product-re3.log

Energy: -1080594.8090416

|   |          |          |          |
|---|----------|----------|----------|
| C | -0.54290 | -0.82512 | 0.03473  |
| H | -0.46694 | -1.91505 | -0.02765 |
| H | -0.46041 | -0.45802 | -0.99481 |
| O | 2.31440  | -0.68924 | 0.31765  |
| O | 0.91617  | 1.48564  | 0.89285  |

|    |          |          |          |
|----|----------|----------|----------|
| Si | 2.87257  | -2.03971 | -0.47652 |
| Si | 0.85481  | 2.56758  | -0.37190 |
| C  | 2.41619  | -3.55031 | 0.52360  |
| H  | 1.33431  | -3.63973 | 0.63969  |
| H  | 2.77291  | -4.46096 | 0.03916  |
| H  | 2.86009  | -3.50431 | 1.51920  |
| C  | 4.71671  | -1.83581 | -0.60180 |
| H  | 5.17187  | -2.68120 | -1.12053 |
| H  | 4.96790  | -0.92701 | -1.15088 |
| H  | 5.16844  | -1.75990 | 0.38803  |
| C  | 2.09402  | -2.11942 | -2.17103 |
| H  | 1.00828  | -2.20487 | -2.11022 |
| H  | 2.33359  | -1.22408 | -2.74647 |
| H  | 2.46678  | -2.98313 | -2.72496 |
| C  | 1.65095  | 4.14288  | 0.21920  |
| H  | 2.71745  | 3.99151  | 0.39064  |
| H  | 1.54201  | 4.93398  | -0.52492 |
| H  | 1.19453  | 4.48818  | 1.14781  |
| C  | -0.93833 | 2.85331  | -0.81496 |
| H  | -1.51080 | 3.18956  | 0.05070  |
| H  | -1.02478 | 3.61516  | -1.59208 |
| H  | -1.40366 | 1.94071  | -1.19191 |
| C  | 1.77058  | 1.86849  | -1.84066 |
| H  | 2.81192  | 1.67877  | -1.57832 |
| H  | 1.32439  | 0.93259  | -2.18149 |
| H  | 1.74847  | 2.57241  | -2.67479 |
| C  | -1.89476 | -0.42551 | 0.63321  |
| H  | -2.03456 | -0.90774 | 1.60262  |
| H  | -1.93260 | 0.65070  | 0.81230  |
| C  | -3.04929 | -0.80146 | -0.27216 |
| H  | -2.94543 | -0.29386 | -1.24228 |
| H  | -3.04261 | -1.88303 | -0.46842 |
| C  | -5.38514 | -0.72381 | -0.44635 |
| H  | -5.44972 | -1.80007 | -0.64912 |
| H  | -5.33767 | -0.20255 | -1.41050 |
| C  | -6.61371 | -0.27486 | 0.31442  |
| H  | -6.65417 | -0.79895 | 1.27403  |
| H  | -6.54244 | 0.79912  | 0.51076  |
| O  | -4.25908 | -0.42760 | 0.33977  |
| O  | -7.73725 | -0.58131 | -0.49134 |

|    |          |          |          |
|----|----------|----------|----------|
| Si | 0.91397  | -0.14499 | 0.98938  |
| C  | 0.86563  | -0.60586 | 2.76511  |
| H  | 0.47336  | 0.05269  | 3.53016  |
| H  | 1.19777  | -1.57343 | 3.12300  |
| H  | 3.64879  | 1.98765  | 1.47519  |
| H  | -8.53095 | -0.30545 | -0.03668 |
| H  | 3.66357  | 0.73262  | 0.63472  |
| O  | 4.19225  | 1.51030  | 0.84793  |

gas\_TriSil-1n-gH-OH-TS-IRC-reactant.log Energy: -1080579.8729044

|    |          |          |          |
|----|----------|----------|----------|
| C  | -0.52507 | -0.81492 | 0.00935  |
| H  | -0.43979 | -1.90132 | -0.09075 |
| H  | -0.44655 | -0.41197 | -1.00639 |
| O  | 2.33981  | -0.65723 | 0.33288  |
| O  | 0.92588  | 1.48271  | 0.91877  |
| Si | 2.89307  | -1.99412 | -0.48971 |
| Si | 0.85171  | 2.60938  | -0.30204 |
| C  | 2.40257  | -3.52694 | 0.45818  |
| H  | 1.31750  | -3.61728 | 0.53663  |
| H  | 2.77357  | -4.42598 | -0.03710 |
| H  | 2.81332  | -3.50609 | 1.46872  |
| C  | 4.74301  | -1.80905 | -0.57448 |
| H  | 5.19740  | -2.64355 | -1.11115 |
| H  | 5.01568  | -0.88865 | -1.09421 |
| H  | 5.17880  | -1.77216 | 0.42485  |
| C  | 2.14922  | -2.01229 | -2.20073 |
| H  | 1.06216  | -2.09413 | -2.16423 |
| H  | 2.40338  | -1.09790 | -2.73875 |
| H  | 2.52902  | -2.85792 | -2.77723 |
| C  | 1.71603  | 4.13423  | 0.31861  |
| H  | 2.76240  | 3.91228  | 0.53365  |
| H  | 1.68401  | 4.93405  | -0.42333 |
| H  | 1.25014  | 4.50079  | 1.23419  |
| C  | -0.94770 | 2.94744  | -0.67687 |
| H  | -1.48442 | 3.26178  | 0.21938  |
| H  | -1.04573 | 3.73828  | -1.42296 |
| H  | -1.44194 | 2.05688  | -1.06996 |
| C  | 1.69691  | 1.93928  | -1.82827 |
| H  | 2.74498  | 1.72004  | -1.62119 |
| H  | 1.21766  | 1.02545  | -2.18403 |

|    |          |          |          |
|----|----------|----------|----------|
| H  | 1.65563  | 2.67234  | -2.63631 |
| C  | -1.88368 | -0.44935 | 0.61641  |
| H  | -2.03120 | -0.97793 | 1.56009  |
| H  | -1.92823 | 0.61730  | 0.84575  |
| C  | -3.03020 | -0.78733 | -0.31392 |
| H  | -2.92387 | -0.23114 | -1.25664 |
| H  | -3.01439 | -1.85769 | -0.56383 |
| C  | -5.36562 | -0.71758 | -0.49769 |
| H  | -5.42189 | -1.78310 | -0.75282 |
| H  | -5.31609 | -0.14975 | -1.43501 |
| C  | -6.60140 | -0.31395 | 0.27669  |
| H  | -6.64268 | -0.88289 | 1.21038  |
| H  | -6.53935 | 0.75009  | 0.52368  |
| O  | -4.24589 | -0.45288 | 0.30866  |
| O  | -7.71831 | -0.59059 | -0.54873 |
| Si | 0.91485  | -0.14704 | 0.99730  |
| C  | 0.84716  | -0.66040 | 2.77582  |
| H  | -0.05658 | -0.28561 | 3.25729  |
| H  | 0.85745  | -1.74799 | 2.86643  |
| H  | 1.70825  | -0.26488 | 3.31533  |
| H  | -8.51624 | -0.33864 | -0.08762 |
| H  | 3.63382  | 0.73480  | 0.55060  |
| O  | 4.32370  | 1.42829  | 0.59718  |

gas\_TriSil-1n-gH-OH-TS.log Energy: -1080571.8281075

|    |          |          |          |
|----|----------|----------|----------|
| C  | -0.47764 | -0.72278 | -0.15940 |
| H  | -0.35108 | -1.80081 | -0.29849 |
| H  | -0.45553 | -0.28438 | -1.16372 |
| O  | 2.38478  | -0.42198 | 0.02718  |
| O  | 0.86260  | 1.59245  | 0.84305  |
| Si | 2.98427  | -1.72312 | -0.81108 |
| Si | 0.76092  | 2.79105  | -0.30122 |
| C  | 2.56878  | -3.28291 | 0.12810  |
| H  | 1.49037  | -3.44199 | 0.18735  |
| H  | 3.00635  | -4.16012 | -0.35151 |
| H  | 2.95912  | -3.22241 | 1.14572  |
| C  | 4.82830  | -1.48086 | -0.90588 |
| H  | 5.29984  | -2.28242 | -1.47707 |
| H  | 5.07058  | -0.53389 | -1.39025 |
| H  | 5.27265  | -1.47679 | 0.09085  |

|    |          |          |          |
|----|----------|----------|----------|
| C  | 2.22475  | -1.74274 | -2.51620 |
| H  | 1.14159  | -1.86325 | -2.46500 |
| H  | 2.43767  | -0.81090 | -3.04250 |
| H  | 2.62463  | -2.56485 | -3.11257 |
| C  | 1.46287  | 4.33603  | 0.46319  |
| H  | 2.50846  | 4.19011  | 0.73714  |
| H  | 1.40681  | 5.17785  | -0.22917 |
| H  | 0.91298  | 4.60297  | 1.36660  |
| C  | -1.03650 | 3.02630  | -0.75389 |
| H  | -1.63565 | 3.26112  | 0.12704  |
| H  | -1.15326 | 3.84374  | -1.46797 |
| H  | -1.44935 | 2.12463  | -1.21022 |
| C  | 1.73238  | 2.28594  | -1.81646 |
| H  | 2.76819  | 2.06614  | -1.55616 |
| H  | 1.30881  | 1.39061  | -2.27560 |
| H  | 1.72432  | 3.08155  | -2.56375 |
| C  | -1.82184 | -0.43110 | 0.51390  |
| H  | -1.89022 | -0.95716 | 1.46845  |
| H  | -1.91426 | 0.63344  | 0.73709  |
| C  | -2.99319 | -0.84388 | -0.35332 |
| H  | -2.96364 | -0.29765 | -1.30728 |
| H  | -2.93286 | -1.91569 | -0.58964 |
| C  | -5.33532 | -0.90077 | -0.41984 |
| H  | -5.34521 | -1.97103 | -0.66068 |
| H  | -5.36489 | -0.34349 | -1.36434 |
| C  | -6.55081 | -0.55542 | 0.41267  |
| H  | -6.51477 | -1.11577 | 1.35171  |
| H  | -6.53385 | 0.51299  | 0.64777  |
| O  | -4.19272 | -0.56430 | 0.32529  |
| O  | -7.69109 | -0.89988 | -0.35318 |
| Si | 0.98022  | -0.03212 | 0.78418  |
| C  | 1.07199  | -0.68162 | 2.52295  |
| H  | 0.54516  | -0.10105 | 3.27730  |
| H  | 0.84768  | -1.74273 | 2.62454  |
| H  | 2.23208  | -0.60441 | 2.83194  |
| H  | -8.47730 | -0.69182 | 0.14820  |
| H  | 3.70204  | -0.32316 | 1.94659  |
| O  | 3.57695  | -0.57105 | 2.87470  |

gas\_TriSil-1n-neutral.log      Energy: -1033046.7327919



|    |          |          |          |
|----|----------|----------|----------|
| C  | -0.48082 | -0.77779 | 0.09179  |
| H  | -0.45954 | -1.86992 | 0.17754  |
| H  | -0.33753 | -0.55418 | -0.97004 |
| O  | 2.36775  | -0.56197 | 0.29385  |
| O  | 0.92917  | 1.56340  | 0.93502  |
| Si | 2.97982  | -1.91365 | -0.43091 |
| Si | 1.41781  | 2.64056  | -0.22671 |
| C  | 2.61995  | -3.40259 | 0.64138  |
| H  | 1.54505  | -3.55145 | 0.76228  |
| H  | 3.03224  | -4.31193 | 0.20041  |
| H  | 3.05675  | -3.28197 | 1.63397  |
| C  | 4.81524  | -1.64653 | -0.60646 |
| H  | 5.29490  | -2.50177 | -1.08570 |
| H  | 5.01905  | -0.76257 | -1.21274 |
| H  | 5.28045  | -1.49918 | 0.36905  |
| C  | 2.18688  | -2.12858 | -2.10903 |
| H  | 1.11147  | -2.28935 | -2.02112 |
| H  | 2.34655  | -1.24684 | -2.73186 |
| H  | 2.61213  | -2.98753 | -2.63174 |
| C  | 0.55392  | 4.25153  | 0.13608  |
| H  | 0.81228  | 4.61192  | 1.13272  |
| H  | 0.83732  | 5.01993  | -0.58551 |
| H  | -0.52927 | 4.12929  | 0.09288  |
| C  | 0.91923  | 1.99178  | -1.91012 |
| H  | -0.16093 | 1.84759  | -1.97215 |
| H  | 1.21073  | 2.68740  | -2.69909 |
| H  | 1.40250  | 1.03394  | -2.11153 |
| C  | 3.27130  | 2.83168  | -0.14125 |
| H  | 3.57881  | 3.21154  | 0.83412  |
| H  | 3.75145  | 1.86396  | -0.29264 |
| H  | 3.63551  | 3.52253  | -0.90385 |
| C  | -1.83397 | -0.23832 | 0.56074  |
| H  | -2.00384 | -0.48512 | 1.61115  |
| H  | -1.84874 | 0.85106  | 0.49066  |
| C  | -2.98222 | -0.79484 | -0.25590 |
| H  | -2.84934 | -0.53712 | -1.31623 |
| H  | -3.00002 | -1.89174 | -0.18680 |
| C  | -5.31392 | -0.72647 | -0.48781 |
| H  | -5.39555 | -1.81862 | -0.42135 |
| H  | -5.24398 | -0.45947 | -1.54971 |

|    |          |          |          |
|----|----------|----------|----------|
| C  | -6.54471 | -0.08697 | 0.11722  |
| H  | -6.60799 | -0.35887 | 1.17513  |
| H  | -6.45649 | 1.00123  | 0.04569  |
| O  | -4.19446 | -0.26222 | 0.22166  |
| O  | -7.66320 | -0.56509 | -0.60853 |
| Si | 0.97957  | -0.06940 | 1.02032  |
| C  | 0.97341  | -0.56939 | 2.80710  |
| H  | 0.08103  | -0.19876 | 3.31293  |
| H  | 0.99595  | -1.65594 | 2.90669  |
| H  | 1.84594  | -0.16171 | 3.31844  |
| H  | -8.45745 | -0.17550 | -0.24780 |

gas\_water.log Energy: -47964.2313678

|   |          |          |          |
|---|----------|----------|----------|
| O | 0.00000  | 0.11619  | -0.00000 |
| H | 0.76011  | -0.46477 | -0.00000 |
| H | -0.76011 | -0.46477 | 0.00000  |

soln\_hydroxyl\_radical.log Energy: -47530.5536898

|   |          |          |          |
|---|----------|----------|----------|
| O | 0.00000  | 0.00000  | 0.10797  |
| H | -0.00000 | -0.00000 | -0.86374 |

soln\_H\_radical.log Energy: -314.0653976

|   |         |         |         |
|---|---------|---------|---------|
| H | 0.00000 | 0.00000 | 0.00000 |
|---|---------|---------|---------|

soln\_TriSil-1n-aH-OH.log Energy: -1032633.6543212

|    |          |          |          |
|----|----------|----------|----------|
| C  | 0.54126  | -0.30723 | 2.35910  |
| H  | 0.83660  | -1.00861 | 3.13302  |
| O  | 1.44865  | -0.63636 | -0.34876 |
| O  | 1.48631  | 1.77273  | 0.68862  |
| Si | 1.34651  | -2.23224 | -0.80528 |
| Si | 0.82409  | 2.55527  | -0.62835 |
| C  | 2.94820  | -2.67650 | -1.64644 |
| H  | 3.78682  | -2.54213 | -0.95923 |
| H  | 2.94408  | -3.71735 | -1.97710 |
| H  | 3.12109  | -2.04390 | -2.51944 |
| C  | -0.09738 | -2.36214 | -1.97464 |
| H  | -0.17919 | -3.37328 | -2.37976 |
| H  | -1.03471 | -2.12601 | -1.46610 |
| H  | 0.01872  | -1.67191 | -2.81279 |
| C  | 1.08639  | -3.31161 | 0.69387  |

|    |          |          |          |
|----|----------|----------|----------|
| H  | 1.90338  | -3.20088 | 1.41043  |
| H  | 0.15142  | -3.06968 | 1.20226  |
| H  | 1.04601  | -4.36165 | 0.39398  |
| C  | -0.83723 | 1.82826  | -1.06875 |
| H  | -1.51433 | 1.82901  | -0.21253 |
| H  | -1.29762 | 2.42523  | -1.86010 |
| H  | -0.73975 | 0.80485  | -1.43364 |
| C  | 1.99303  | 2.40636  | -2.07318 |
| H  | 2.10830  | 1.36338  | -2.37347 |
| H  | 1.61622  | 2.96651  | -2.93204 |
| H  | 2.97973  | 2.79996  | -1.82062 |
| C  | 0.63038  | 4.33480  | -0.11382 |
| H  | -0.04303 | 4.42163  | 0.74142  |
| H  | 1.59204  | 4.77053  | 0.16452  |
| H  | 0.21480  | 4.92783  | -0.93146 |
| C  | -0.89476 | 0.11189  | 2.33742  |
| H  | -1.36604 | -0.01556 | 3.31312  |
| H  | -0.97245 | 1.16844  | 2.06273  |
| C  | -1.68211 | -0.67658 | 1.29378  |
| H  | -1.17367 | -0.62413 | 0.32807  |
| H  | -1.75891 | -1.73147 | 1.57819  |
| C  | -3.65916 | -0.62617 | 0.03794  |
| H  | -3.78080 | -1.71205 | 0.12188  |
| H  | -3.08577 | -0.41415 | -0.87192 |
| C  | -5.01070 | 0.04677  | -0.03564 |
| H  | -5.58274 | -0.16722 | 0.87073  |
| H  | -4.87795 | 1.12858  | -0.11708 |
| O  | -2.97886 | -0.11657 | 1.16776  |
| O  | -5.67799 | -0.46506 | -1.18346 |
| Si | 1.73998  | 0.18710  | 1.04878  |
| C  | 3.49276  | -0.08869 | 1.57968  |
| H  | 3.74776  | 0.51659  | 2.45128  |
| H  | 3.64673  | -1.13844 | 1.84034  |
| H  | 4.18180  | 0.16415  | 0.77158  |
| H  | -6.52555 | -0.02302 | -1.25748 |

soln\_TriSil-1n-bH-OH.log Energy: -1032634.4099682

|   |          |          |         |
|---|----------|----------|---------|
| C | -0.12931 | -1.20290 | 1.57505 |
| H | -0.22522 | -2.29312 | 1.65820 |
| H | -0.95882 | -0.75939 | 2.12762 |

|    |          |          |          |
|----|----------|----------|----------|
| O  | -1.95324 | -1.29091 | -0.62799 |
| O  | -0.17314 | 0.71696  | -0.63508 |
| Si | -3.50205 | -0.77562 | -0.30070 |
| Si | -0.05662 | 2.23142  | 0.04276  |
| C  | -4.63496 | -2.05441 | -1.04065 |
| H  | -4.45859 | -3.03664 | -0.59760 |
| H  | -5.67982 | -1.78836 | -0.86619 |
| H  | -4.48303 | -2.13499 | -2.11891 |
| C  | -3.78588 | 0.88735  | -1.09351 |
| H  | -4.84461 | 1.15215  | -1.03919 |
| H  | -3.22184 | 1.67175  | -0.58854 |
| H  | -3.49403 | 0.87786  | -2.14534 |
| C  | -3.75979 | -0.66524 | 1.54302  |
| H  | -3.53871 | -1.61719 | 2.02966  |
| H  | -3.12955 | 0.10402  | 1.99260  |
| H  | -4.80085 | -0.41123 | 1.75716  |
| C  | 1.73107  | 2.60700  | 0.41358  |
| H  | 2.36644  | 2.38700  | -0.44694 |
| H  | 1.84356  | 3.66716  | 0.65395  |
| H  | 2.09543  | 2.02786  | 1.26233  |
| C  | -1.07394 | 2.32338  | 1.60305  |
| H  | -0.73040 | 1.60596  | 2.35006  |
| H  | -0.98673 | 3.32327  | 2.03560  |
| H  | -2.13067 | 2.13666  | 1.40593  |
| C  | -0.70063 | 3.42572  | -1.23420 |
| H  | -0.09795 | 3.38075  | -2.14388 |
| H  | -1.73524 | 3.20412  | -1.50192 |
| H  | -0.66011 | 4.44940  | -0.85521 |
| C  | 1.17209  | -0.73955 | 2.10003  |
| H  | 1.21898  | 0.19602  | 2.64352  |
| C  | 2.45393  | -1.35236 | 1.68104  |
| H  | 3.13808  | -1.47259 | 2.52975  |
| H  | 2.28620  | -2.34069 | 1.23841  |
| C  | 4.23961  | -1.09210 | 0.14457  |
| H  | 3.99391  | -2.05997 | -0.30834 |
| H  | 5.00465  | -1.25777 | 0.91190  |
| C  | 4.75154  | -0.14038 | -0.91298 |
| H  | 3.97835  | 0.01293  | -1.67057 |
| H  | 4.98773  | 0.82493  | -0.45782 |
| O  | 3.08619  | -0.50707 | 0.70911  |

|    |          |          |          |
|----|----------|----------|----------|
| O  | 5.91478  | -0.72094 | -1.49203 |
| Si | -0.40924 | -0.86181 | -0.26280 |
| C  | 0.70149  | -1.88515 | -1.33548 |
| H  | 1.74835  | -1.62189 | -1.18099 |
| H  | 0.57757  | -2.94771 | -1.11916 |
| H  | 0.46062  | -1.72249 | -2.38805 |
| H  | 6.23908  | -0.12623 | -2.17094 |

soln\_TriSil-1n-cH-OH.log Energy: -1032633.9623343

|    |          |          |          |
|----|----------|----------|----------|
| C  | -0.41781 | -0.76703 | 0.17559  |
| H  | -0.43764 | -1.84799 | 0.34651  |
| H  | -0.27688 | -0.62833 | -0.89885 |
| O  | 2.45218  | -0.54006 | 0.34006  |
| O  | 1.02037  | 1.58380  | 1.01083  |
| Si | 2.95670  | -1.90596 | -0.46702 |
| Si | 1.26169  | 2.64774  | -0.25218 |
| C  | 2.43639  | -3.41159 | 0.50341  |
| H  | 1.34936  | -3.46881 | 0.59248  |
| H  | 2.77909  | -4.32273 | 0.00766  |
| H  | 2.86102  | -3.39511 | 1.50915  |
| C  | 4.81065  | -1.78992 | -0.58037 |
| H  | 5.21984  | -2.65364 | -1.10891 |
| H  | 5.11076  | -0.89022 | -1.12158 |
| H  | 5.26227  | -1.75616 | 0.41301  |
| C  | 2.19883  | -1.92977 | -2.17001 |
| H  | 1.11395  | -2.03709 | -2.12317 |
| H  | 2.42962  | -1.01091 | -2.71287 |
| H  | 2.59484  | -2.76905 | -2.74683 |
| C  | 0.34365  | 4.20502  | 0.19137  |
| H  | 0.70907  | 4.62119  | 1.13234  |
| H  | 0.47218  | 4.96244  | -0.58493 |
| H  | -0.72517 | 4.00864  | 0.29814  |
| C  | 0.59374  | 1.92077  | -1.83595 |
| H  | -0.47011 | 1.69045  | -1.75154 |
| H  | 0.71957  | 2.63773  | -2.65091 |
| H  | 1.12314  | 1.00622  | -2.11142 |
| C  | 3.08915  | 2.97114  | -0.42033 |
| H  | 3.50711  | 3.35884  | 0.51083  |
| H  | 3.62273  | 2.05399  | -0.67710 |
| H  | 3.27890  | 3.70494  | -1.20702 |

|    |          |          |          |
|----|----------|----------|----------|
| C  | -1.75118 | -0.14661 | 0.60376  |
| H  | -1.90431 | -0.26642 | 1.68132  |
| H  | -1.72337 | 0.93818  | 0.42527  |
| C  | -2.89863 | -0.74655 | -0.12181 |
| H  | -2.81447 | -1.02690 | -1.16883 |
| C  | -5.21682 | -0.82329 | -0.48110 |
| H  | -5.24704 | -1.91339 | -0.41142 |
| H  | -5.09034 | -0.53949 | -1.52929 |
| C  | -6.48576 | -0.22322 | 0.07940  |
| H  | -6.59196 | -0.50004 | 1.13115  |
| H  | -6.44300 | 0.86649  | 0.00803  |
| O  | -4.13094 | -0.32153 | 0.28754  |
| O  | -7.56679 | -0.73669 | -0.68820 |
| Si | 1.05802  | -0.06120 | 1.07494  |
| C  | 1.07368  | -0.56446 | 2.85804  |
| H  | 0.17387  | -0.21931 | 3.37085  |
| H  | 1.11413  | -1.65269 | 2.94073  |
| H  | 1.94135  | -0.15074 | 3.37497  |
| H  | -8.38216 | -0.37920 | -0.33190 |

soln\_TriSil-1n-dH-OH.log Energy: -1032636.3320297

|    |          |          |          |
|----|----------|----------|----------|
| C  | -0.41585 | -1.40169 | -0.00629 |
| H  | -0.33298 | -2.49200 | -0.02719 |
| H  | -0.28329 | -1.06409 | -1.03865 |
| O  | 2.40045  | -1.40637 | 0.50111  |
| O  | 1.09976  | 0.90427  | 0.82218  |
| Si | 3.60935  | -0.92755 | -0.54065 |
| Si | 0.49203  | 2.22287  | 0.01792  |
| C  | 4.68472  | -2.42438 | -0.80617 |
| H  | 4.12079  | -3.23524 | -1.27167 |
| H  | 5.52619  | -2.18123 | -1.45873 |
| H  | 5.08728  | -2.78945 | 0.14086  |
| C  | 4.58530  | 0.45465  | 0.24114  |
| H  | 5.38094  | 0.78895  | -0.42875 |
| H  | 3.94498  | 1.31049  | 0.45985  |
| H  | 5.04715  | 0.12656  | 1.17467  |
| C  | 2.86575  | -0.36512 | -2.15632 |
| H  | 2.14687  | -1.09360 | -2.53660 |
| H  | 2.36019  | 0.59504  | -2.05182 |
| H  | 3.65089  | -0.24431 | -2.90658 |

|    |          |          |          |
|----|----------|----------|----------|
| C  | -0.64974 | 3.12204  | 1.18374  |
| H  | -0.12617 | 3.42803  | 2.09158  |
| H  | -1.05867 | 4.01752  | 0.71039  |
| H  | -1.48647 | 2.48200  | 1.47253  |
| C  | -0.44736 | 1.73094  | -1.51890 |
| H  | -1.37456 | 1.20692  | -1.28267 |
| H  | -0.71153 | 2.63694  | -2.07077 |
| H  | 0.14478  | 1.09860  | -2.18177 |
| C  | 1.95133  | 3.28612  | -0.44232 |
| H  | 2.52606  | 3.56697  | 0.44245  |
| H  | 2.61904  | 2.76250  | -1.12947 |
| H  | 1.61556  | 4.20337  | -0.93162 |
| C  | -1.79681 | -0.99514 | 0.51731  |
| H  | -1.99302 | -1.48660 | 1.47233  |
| H  | -1.84583 | 0.08160  | 0.70014  |
| C  | -2.88356 | -1.36555 | -0.46459 |
| H  | -2.73523 | -0.84818 | -1.41646 |
| H  | -2.89095 | -2.44264 | -0.65048 |
| C  | -5.21919 | -1.23053 | -0.71799 |
| C  | -6.51387 | -0.72881 | -0.23561 |
| H  | -7.31512 | -1.22830 | -0.78306 |
| H  | -6.62813 | -0.94484 | 0.83010  |
| O  | -4.15168 | -0.97995 | 0.07811  |
| O  | -6.60976 | 0.70167  | -0.43817 |
| Si | 0.99108  | -0.72351 | 1.00878  |
| C  | 0.78413  | -1.09278 | 2.81334  |
| H  | -0.12981 | -0.63606 | 3.19789  |
| H  | 0.72460  | -2.16886 | 2.98773  |
| H  | 1.62639  | -0.70076 | 3.38663  |
| H  | -7.45929 | 0.98577  | -0.09137 |
| H  | -5.02440 | -1.43608 | -1.76397 |

soln\_TriSil-1n-eH-OH.log Energy: -1032634.6042953

|    |          |          |          |
|----|----------|----------|----------|
| C  | -0.35770 | -1.07946 | 0.34773  |
| H  | -0.34128 | -2.15228 | 0.56492  |
| H  | -0.18788 | -0.98515 | -0.72711 |
| O  | 2.47559  | -1.03798 | 0.81105  |
| O  | 1.16972  | 1.30744  | 0.95291  |
| Si | 3.31706  | -1.42083 | -0.57226 |
| Si | 0.78068  | 2.43732  | -0.20245 |

|    |          |          |          |
|----|----------|----------|----------|
| C  | 4.65060  | -2.61027 | -0.04900 |
| H  | 4.22010  | -3.51435 | 0.38631  |
| H  | 5.25963  | -2.90513 | -0.90631 |
| H  | 5.31045  | -2.15647 | 0.69325  |
| C  | 4.06358  | 0.12711  | -1.29374 |
| H  | 4.75610  | -0.13183 | -2.09841 |
| H  | 3.29582  | 0.77744  | -1.71482 |
| H  | 4.61732  | 0.68998  | -0.54019 |
| C  | 2.18554  | -2.21602 | -1.82395 |
| H  | 1.63349  | -3.05230 | -1.39115 |
| H  | 1.46636  | -1.49963 | -2.22487 |
| H  | 2.77643  | -2.59846 | -2.65998 |
| C  | -0.61270 | 3.48727  | 0.45420  |
| H  | -0.33001 | 3.96614  | 1.39397  |
| H  | -0.86325 | 4.27411  | -0.26126 |
| H  | -1.51260 | 2.89545  | 0.63114  |
| C  | 0.26070  | 1.60219  | -1.78837 |
| H  | -0.70319 | 1.10220  | -1.67640 |
| H  | 0.15887  | 2.35096  | -2.57772 |
| H  | 0.99354  | 0.86396  | -2.11959 |
| C  | 2.28913  | 3.49754  | -0.47094 |
| H  | 2.58609  | 3.98542  | 0.45994  |
| H  | 3.13582  | 2.91176  | -0.83160 |
| H  | 2.07919  | 4.27785  | -1.20610 |
| C  | -1.72403 | -0.49452 | 0.71186  |
| H  | -1.93631 | -0.65534 | 1.77140  |
| H  | -1.73439 | 0.58514  | 0.54588  |
| C  | -2.82815 | -1.11787 | -0.11398 |
| H  | -2.64297 | -0.94644 | -1.18149 |
| H  | -2.86284 | -2.20165 | 0.04960  |
| C  | -5.14782 | -1.06984 | -0.51109 |
| H  | -5.12684 | -2.16853 | -0.43831 |
| H  | -5.03346 | -0.81072 | -1.57043 |
| C  | -6.42127 | -0.51506 | -0.00008 |
| H  | -6.74568 | -0.68299 | 1.01974  |
| O  | -4.07329 | -0.54003 | 0.25005  |
| O  | -7.40145 | -0.35470 | -0.94623 |
| Si | 1.07315  | -0.30605 | 1.25979  |
| C  | 0.90738  | -0.50564 | 3.09529  |
| H  | 0.00600  | -0.00811 | 3.45799  |



|   |          |          |          |
|---|----------|----------|----------|
| H | 0.84528  | -1.56087 | 3.36790  |
| H | 1.76518  | -0.07030 | 3.61150  |
| H | -8.23355 | -0.15657 | -0.50893 |

soln\_TriSil-1n-fH-OH.log Energy: -1032625.4744592

|    |          |          |          |
|----|----------|----------|----------|
| C  | -0.37482 | -1.06591 | 0.33391  |
| H  | -0.37049 | -2.13807 | 0.55470  |
| H  | -0.19331 | -0.97677 | -0.73948 |
| O  | 2.45192  | -1.05817 | 0.83195  |
| O  | 1.17778  | 1.30614  | 0.93628  |
| Si | 3.30528  | -1.44896 | -0.54212 |
| Si | 0.79976  | 2.43671  | -0.22189 |
| C  | 4.62486  | -2.64649 | -0.00235 |
| H  | 4.18338  | -3.54617 | 0.43107  |
| H  | 5.24044  | -2.94822 | -0.85255 |
| H  | 5.28034  | -2.19537 | 0.74538  |
| C  | 4.06862  | 0.09290  | -1.25888 |
| H  | 4.76857  | -0.17168 | -2.05522 |
| H  | 3.30877  | 0.74584  | -1.69017 |
| H  | 4.61677  | 0.65499  | -0.50071 |
| C  | 2.18095  | -2.23828 | -1.80399 |
| H  | 1.61726  | -3.06876 | -1.37505 |
| H  | 1.47219  | -1.51701 | -2.21472 |
| H  | 2.77770  | -2.62789 | -2.63251 |
| C  | -0.58870 | 3.49794  | 0.42730  |
| H  | -0.30615 | 3.97609  | 1.36748  |
| H  | -0.82979 | 4.28569  | -0.29043 |
| H  | -1.49427 | 2.91404  | 0.60140  |
| C  | 0.28139  | 1.60206  | -1.80853 |
| H  | -0.68590 | 1.10785  | -1.70037 |
| H  | 0.18790  | 2.34983  | -2.59985 |
| H  | 1.01178  | 0.85905  | -2.13445 |
| C  | 2.31595  | 3.48685  | -0.48638 |
| H  | 2.61501  | 3.97108  | 0.44572  |
| H  | 3.15923  | 2.89627  | -0.84720 |
| H  | 2.11206  | 4.26989  | -1.22035 |
| C  | -1.73890 | -0.46719 | 0.68321  |
| H  | -1.96483 | -0.62743 | 1.73993  |
| H  | -1.73687 | 0.61267  | 0.51858  |
| C  | -2.83979 | -1.07743 | -0.15621 |

|    |          |          |          |
|----|----------|----------|----------|
| H  | -2.64262 | -0.90574 | -1.22124 |
| H  | -2.88973 | -2.16061 | 0.00574  |
| C  | -5.15584 | -1.00683 | -0.56251 |
| H  | -5.25424 | -2.08567 | -0.40057 |
| H  | -4.99174 | -0.83117 | -1.63119 |
| C  | -6.42120 | -0.30259 | -0.11474 |
| H  | -6.59749 | -0.42920 | 0.96819  |
| H  | -6.34210 | 0.79264  | -0.23183 |
| O  | -4.08308 | -0.48742 | 0.19498  |
| O  | -7.55251 | -0.70863 | -0.76673 |
| Si | 1.05449  | -0.30280 | 1.25710  |
| C  | 0.86318  | -0.48345 | 3.09203  |
| H  | -0.03477 | 0.03130  | 3.43890  |
| H  | 0.78129  | -1.53501 | 3.37341  |
| H  | 1.72116  | -0.05658 | 3.61495  |

soln\_TriSil-1n-gH-OH.log Energy: -1032627.2350061

|    |          |          |          |
|----|----------|----------|----------|
| C  | -0.33440 | -1.04412 | 0.36486  |
| H  | -0.34070 | -2.11315 | 0.59947  |
| H  | -0.15039 | -0.96905 | -0.70937 |
| O  | 2.49464  | -1.02565 | 0.84617  |
| O  | 1.18962  | 1.33439  | 0.98025  |
| Si | 3.33550  | -1.48467 | -0.51573 |
| Si | 0.87731  | 2.44179  | -0.22218 |
| C  | 4.62389  | -2.69724 | 0.06357  |
| H  | 4.15936  | -3.57164 | 0.52381  |
| H  | 5.23278  | -3.04059 | -0.77559 |
| H  | 5.28948  | -2.23958 | 0.79825  |
| C  | 4.13866  | 0.01429  | -1.27800 |
| H  | 4.82212  | -0.29294 | -2.07338 |
| H  | 3.39753  | 0.68268  | -1.71845 |
| H  | 4.71274  | 0.57548  | -0.53851 |
| C  | 2.18913  | -2.28652 | -1.74901 |
| H  | 1.60606  | -3.08778 | -1.29136 |
| H  | 1.49750  | -1.56265 | -2.18341 |
| H  | 2.77485  | -2.71896 | -2.56402 |
| C  | -0.50316 | 3.54849  | 0.36211  |
| H  | -0.23675 | 4.04441  | 1.29769  |
| H  | -0.70973 | 4.32216  | -0.38116 |
| H  | -1.42365 | 2.98482  | 0.52525  |

|    |          |          |          |
|----|----------|----------|----------|
| C  | 0.38094  | 1.57610  | -1.79901 |
| H  | -0.60309 | 1.11302  | -1.70503 |
| H  | 0.33176  | 2.30371  | -2.61279 |
| H  | 1.09765  | 0.80355  | -2.08377 |
| C  | 2.43053  | 3.43938  | -0.47074 |
| H  | 2.71181  | 3.95001  | 0.45270  |
| H  | 3.26672  | 2.80963  | -0.77831 |
| H  | 2.27683  | 4.19873  | -1.24085 |
| C  | -1.69026 | -0.42450 | 0.70889  |
| H  | -1.90838 | -0.55793 | 1.77150  |
| H  | -1.67832 | 0.65143  | 0.51983  |
| C  | -2.80360 | -1.04265 | -0.10816 |
| H  | -2.61329 | -0.89466 | -1.17817 |
| H  | -2.85995 | -2.12207 | 0.07610  |
| C  | -5.12094 | -0.95911 | -0.50037 |
| H  | -5.21370 | -2.03746 | -0.32884 |
| H  | -4.96115 | -0.79567 | -1.57219 |
| C  | -6.37969 | -0.25310 | -0.04961 |
| H  | -6.53628 | -0.42364 | 1.01837  |
| H  | -6.28198 | 0.82217  | -0.21998 |
| O  | -4.03816 | -0.43582 | 0.24163  |
| O  | -7.46136 | -0.78494 | -0.80608 |
| Si | 1.09960  | -0.27772 | 1.27929  |
| C  | 0.91860  | -0.46870 | 3.09705  |
| H  | 0.50606  | 0.30847  | 3.73102  |
| H  | 1.15591  | -1.39403 | 3.61142  |
| H  | -8.27169 | -0.37764 | -0.49482 |

soln\_TriSil-1n-neutral.log    Energy: -1033051.4127575

|    |          |          |          |
|----|----------|----------|----------|
| C  | -0.38061 | -0.82014 | 0.17989  |
| H  | -0.36710 | -1.90319 | 0.33991  |
| H  | -0.23472 | -0.66574 | -0.89186 |
| O  | 2.48376  | -0.51994 | 0.39005  |
| O  | 0.98301  | 1.56721  | 1.02537  |
| Si | 3.02987  | -1.83060 | -0.47777 |
| Si | 1.21680  | 2.63334  | -0.23685 |
| C  | 2.52291  | -3.39434 | 0.40345  |
| H  | 1.43592  | -3.47748 | 0.46804  |
| H  | 2.89418  | -4.27245 | -0.12987 |
| H  | 2.92791  | -3.41943 | 1.41715  |

|    |          |          |          |
|----|----------|----------|----------|
| C  | 4.88299  | -1.67231 | -0.54776 |
| H  | 5.31982  | -2.49828 | -1.11330 |
| H  | 5.17385  | -0.73920 | -1.03485 |
| H  | 5.31559  | -1.68241 | 0.45456  |
| C  | 2.31036  | -1.77884 | -2.19680 |
| H  | 1.22679  | -1.90627 | -2.18370 |
| H  | 2.53825  | -0.82912 | -2.68510 |
| H  | 2.73547  | -2.58005 | -2.80623 |
| C  | 0.33332  | 4.20225  | 0.23532  |
| H  | 0.72576  | 4.60671  | 1.17053  |
| H  | 0.45711  | 4.96229  | -0.53917 |
| H  | -0.73594 | 4.02248  | 0.36435  |
| C  | 0.50411  | 1.92525  | -1.80967 |
| H  | -0.55585 | 1.68919  | -1.69642 |
| H  | 0.60316  | 2.65310  | -2.61866 |
| H  | 1.02874  | 1.01674  | -2.11259 |
| C  | 3.04511  | 2.92940  | -0.44473 |
| H  | 3.49111  | 3.30065  | 0.48012  |
| H  | 3.55759  | 2.00667  | -0.72359 |
| H  | 3.22772  | 3.66856  | -1.22811 |
| C  | -1.73430 | -0.24538 | 0.60396  |
| H  | -1.90427 | -0.41306 | 1.67042  |
| H  | -1.74916 | 0.83521  | 0.44295  |
| C  | -2.86886 | -0.87007 | -0.17881 |
| H  | -2.72929 | -0.69393 | -1.25224 |
| H  | -2.89335 | -1.95434 | -0.01745 |
| C  | -5.20276 | -0.83216 | -0.46748 |
| H  | -5.26021 | -1.91685 | -0.32232 |
| H  | -5.09737 | -0.63577 | -1.54050 |
| C  | -6.45646 | -0.17209 | 0.06031  |
| H  | -6.56036 | -0.37749 | 1.12863  |
| H  | -6.39262 | 0.90975  | -0.08184 |
| O  | -4.10032 | -0.30050 | 0.23861  |
| O  | -7.55797 | -0.70909 | -0.66321 |
| Si | 1.06432  | -0.07622 | 1.09709  |
| C  | 1.06918  | -0.57354 | 2.88189  |
| H  | 0.15206  | -0.25625 | 3.38168  |
| H  | 1.14318  | -1.65996 | 2.96694  |
| H  | 1.91631  | -0.13207 | 3.40987  |
| H  | -8.36201 | -0.31870 | -0.31602 |

soln\_water.logEnergy: -47971.9724922

|   |          |          |          |
|---|----------|----------|----------|
| O | 0.00000  | 0.11747  | -0.00000 |
| H | 0.75906  | -0.47000 | 0.00000  |
| H | -0.75906 | -0.46975 | -0.00000 |

TriSil-1n-reduced-a.log Energy: -1032633.3761589

|    |          |          |          |
|----|----------|----------|----------|
| C  | 0.18460  | -1.20355 | 0.22336  |
| H  | 0.01318  | -1.64932 | -0.75372 |
| O  | -1.41446 | 1.17064  | 0.51034  |
| O  | -2.61176 | -1.16297 | 0.79070  |
| Si | -0.36782 | 2.29004  | -0.14332 |
| Si | -3.63091 | -1.13809 | -0.53247 |
| C  | 1.10025  | 2.48480  | 0.99192  |
| H  | 1.62633  | 1.54104  | 1.14525  |
| H  | 1.81266  | 3.20050  | 0.57527  |
| H  | 0.78206  | 2.85657  | 1.96828  |
| C  | -1.32170 | 3.88446  | -0.25926 |
| H  | -0.70728 | 4.67003  | -0.70475 |
| H  | -2.21069 | 3.75873  | -0.88089 |
| H  | -1.64113 | 4.22441  | 0.72782  |
| C  | 0.15959  | 1.73261  | -1.84337 |
| H  | 0.58957  | 0.72991  | -1.82353 |
| H  | -0.69200 | 1.72397  | -2.52693 |
| H  | 0.90953  | 2.41503  | -2.25059 |
| C  | -4.69509 | -2.65959 | -0.40295 |
| H  | -5.27631 | -2.65414 | 0.52135  |
| H  | -5.39477 | -2.70917 | -1.24021 |
| H  | -4.08635 | -3.56579 | -0.41772 |
| C  | -2.61402 | -1.17049 | -2.09630 |
| H  | -2.00884 | -2.07692 | -2.15705 |
| H  | -3.26932 | -1.14373 | -2.97012 |
| H  | -1.94618 | -0.30843 | -2.15286 |
| C  | -4.67679 | 0.40363  | -0.47588 |
| H  | -5.21681 | 0.47609  | 0.47032  |
| H  | -4.06274 | 1.29876  | -0.58787 |
| H  | -5.41245 | 0.39352  | -1.28351 |
| C  | 1.57742  | -1.33472 | 0.74207  |
| H  | 1.71818  | -0.76832 | 1.66497  |
| H  | 1.77928  | -2.38691 | 0.98252  |

|    |          |          |          |
|----|----------|----------|----------|
| C  | 2.61076  | -0.88912 | -0.28127 |
| H  | 2.49947  | -1.46457 | -1.20742 |
| H  | 2.47764  | 0.17020  | -0.52514 |
| C  | 4.92047  | -0.64171 | -0.62123 |
| H  | 4.79248  | 0.42575  | -0.83317 |
| H  | 4.87024  | -1.18762 | -1.57001 |
| C  | 6.25627  | -0.88044 | 0.04552  |
| H  | 6.29875  | -0.33588 | 0.99216  |
| H  | 6.38276  | -1.94643 | 0.25078  |
| O  | 3.90748  | -1.09034 | 0.25667  |
| O  | 7.26434  | -0.41754 | -0.84552 |
| Si | -1.20512 | -0.36212 | 1.08929  |
| C  | -0.91682 | -0.28858 | 2.91717  |
| H  | -0.79639 | -1.28642 | 3.34254  |
| H  | -0.01353 | 0.28501  | 3.13555  |
| H  | -1.75548 | 0.19943  | 3.41724  |
| H  | 8.11760  | -0.56497 | -0.43373 |

TriSil-1n-reduced-b.log      Energy: -1032633.4894369

|    |          |          |          |
|----|----------|----------|----------|
| C  | -0.14871 | -0.83711 | 1.57318  |
| H  | -0.33457 | -1.91546 | 1.63952  |
| H  | -0.94285 | -0.32689 | 2.11994  |
| O  | -1.93053 | -0.36911 | -0.65751 |
| O  | 0.26186  | 1.10320  | -0.54613 |
| Si | -3.28746 | -1.23637 | -0.23292 |
| Si | -0.27402 | 2.61612  | -0.08616 |
| C  | -2.84391 | -3.04343 | -0.10421 |
| H  | -2.09451 | -3.21678 | 0.67097  |
| H  | -3.72786 | -3.63328 | 0.14920  |
| H  | -2.44990 | -3.41810 | -1.05103 |
| C  | -4.53584 | -0.95186 | -1.58330 |
| H  | -5.46674 | -1.47950 | -1.36445 |
| H  | -4.76605 | 0.11099  | -1.68191 |
| H  | -4.16210 | -1.31021 | -2.54445 |
| C  | -3.93054 | -0.59712 | 1.39547  |
| H  | -3.21555 | -0.76522 | 2.20259  |
| H  | -4.13772 | 0.47346  | 1.33915  |
| H  | -4.86074 | -1.10566 | 1.66006  |
| C  | 1.24255  | 3.68283  | 0.07273  |
| H  | 1.78987  | 3.72836  | -0.87096 |

|    |          |          |          |
|----|----------|----------|----------|
| H  | 0.97111  | 4.70235  | 0.35502  |
| H  | 1.91491  | 3.28750  | 0.83689  |
| C  | -1.17730 | 2.50633  | 1.54311  |
| H  | -0.52839 | 2.12859  | 2.33537  |
| H  | -1.52372 | 3.49992  | 1.83764  |
| H  | -2.05126 | 1.85524  | 1.47388  |
| C  | -1.41793 | 3.26072  | -1.40783 |
| H  | -0.91503 | 3.30285  | -2.37599 |
| H  | -2.29418 | 2.61688  | -1.50687 |
| H  | -1.76323 | 4.26751  | -1.16221 |
| C  | 1.18234  | -0.48695 | 2.11205  |
| H  | 1.31689  | 0.47614  | 2.58991  |
| C  | 2.40121  | -1.24158 | 1.74171  |
| H  | 3.06138  | -1.38685 | 2.60541  |
| H  | 2.13896  | -2.22894 | 1.34532  |
| C  | 4.21927  | -1.25676 | 0.22942  |
| H  | 3.87153  | -2.21374 | -0.17703 |
| H  | 4.94625  | -1.46599 | 1.02266  |
| C  | 4.85898  | -0.43332 | -0.86506 |
| H  | 4.12522  | -0.23701 | -1.65124 |
| H  | 5.19769  | 0.52309  | -0.45883 |
| O  | 3.12893  | -0.51624 | 0.73779  |
| O  | 5.95810  | -1.17747 | -1.37839 |
| Si | -0.33411 | -0.39978 | -0.25843 |
| C  | 0.56406  | -1.61097 | -1.33313 |
| H  | 1.63372  | -1.61244 | -1.11885 |
| H  | 0.17831  | -2.61861 | -1.16495 |
| H  | 0.42528  | -1.36578 | -2.38784 |
| H  | 6.36967  | -0.65973 | -2.07282 |

TriSil-1n-reduced-c.log      Energy: -1032633.9472866

|    |          |          |          |
|----|----------|----------|----------|
| C  | -0.41537 | -0.77485 | 0.18585  |
| H  | -0.42888 | -1.85529 | 0.36288  |
| H  | -0.28112 | -0.64130 | -0.88978 |
| O  | 2.45366  | -0.53202 | 0.33373  |
| O  | 1.01270  | 1.58377  | 1.01210  |
| Si | 2.96072  | -1.89542 | -0.47595 |
| Si | 1.24981  | 2.64702  | -0.25235 |
| C  | 2.44884  | -3.40385 | 0.49473  |
| H  | 1.36233  | -3.46498 | 0.58750  |

|    |          |          |          |
|----|----------|----------|----------|
| H  | 2.79298  | -4.31322 | -0.00328 |
| H  | 2.87689  | -3.38707 | 1.49901  |
| C  | 4.81390  | -1.77275 | -0.59484 |
| H  | 5.22445  | -2.63455 | -1.12546 |
| H  | 5.10918  | -0.87153 | -1.13621 |
| H  | 5.26854  | -1.73828 | 0.39714  |
| C  | 2.19813  | -1.92080 | -2.17676 |
| H  | 1.11375  | -2.03185 | -2.12706 |
| H  | 2.42418  | -1.00080 | -2.71965 |
| H  | 2.59547  | -2.75834 | -2.75521 |
| C  | 0.32989  | 4.20305  | 0.19172  |
| H  | 0.69672  | 4.62080  | 1.13145  |
| H  | 0.45553  | 4.95989  | -0.58563 |
| H  | -0.73837 | 4.00510  | 0.30099  |
| C  | 0.57963  | 1.91641  | -1.83340 |
| H  | -0.48317 | 1.68265  | -1.74535 |
| H  | 0.70055  | 2.63270  | -2.64967 |
| H  | 1.11107  | 1.00320  | -2.10931 |
| C  | 3.07619  | 2.97439  | -0.42494 |
| H  | 3.49566  | 3.36280  | 0.50526  |
| H  | 3.61128  | 2.05866  | -0.68349 |
| H  | 3.26212  | 3.70895  | -1.21184 |
| C  | -1.74956 | -0.16016 | 0.61965  |
| H  | -1.87405 | -0.26413 | 1.70773  |
| H  | -1.74965 | 0.91662  | 0.42255  |
| C  | -2.89960 | -0.78531 | -0.08000 |
| H  | -2.91730 | -1.85180 | -0.28874 |
| C  | -5.21961 | -0.88160 | -0.42011 |
| H  | -5.26234 | -1.90542 | -0.03920 |
| H  | -5.11085 | -0.91309 | -1.50695 |
| C  | -6.46938 | -0.12347 | -0.03570 |
| H  | -6.56100 | -0.08905 | 1.05275  |
| H  | -6.41205 | 0.90027  | -0.41357 |
| O  | -4.11186 | -0.20055 | 0.15525  |
| O  | -7.57097 | -0.81278 | -0.61265 |
| Si | 1.06139  | -0.06088 | 1.07724  |
| C  | 1.09310  | -0.56305 | 2.86057  |
| H  | 0.19613  | -0.22151 | 3.38066  |
| H  | 1.13910  | -1.65104 | 2.94355  |
| H  | 1.96329  | -0.14524 | 3.37000  |



H -8.37261 -0.33863 -0.38440

TriSil-1n-reduced-d.log Energy: -1032636.3334353

|    |          |          |          |
|----|----------|----------|----------|
| C  | -0.46050 | -0.89100 | 0.14449  |
| H  | -0.48672 | -1.97227 | 0.31068  |
| H  | -0.20878 | -0.74657 | -0.90945 |
| O  | 2.36921  | -0.72707 | 0.71425  |
| O  | 0.89732  | 1.47276  | 1.04901  |
| Si | 3.00218  | -1.74964 | -0.43531 |
| Si | 1.20916  | 2.53852  | -0.19332 |
| C  | 2.30764  | -3.46064 | -0.17974 |
| H  | 1.22903  | -3.47626 | -0.34771 |
| H  | 2.76561  | -4.16638 | -0.87661 |
| H  | 2.50026  | -3.81494 | 0.83491  |
| C  | 4.84570  | -1.72762 | -0.17839 |
| H  | 5.34313  | -2.38446 | -0.89526 |
| H  | 5.24189  | -0.71889 | -0.31352 |
| H  | 5.10701  | -2.06407 | 0.82684  |
| C  | 2.58665  | -1.13832 | -2.14751 |
| H  | 1.51442  | -1.18312 | -2.34432 |
| H  | 2.92120  | -0.11005 | -2.29542 |
| H  | 3.08790  | -1.76396 | -2.89045 |
| C  | 0.58195  | 4.19606  | 0.37690  |
| H  | 1.08116  | 4.50804  | 1.29645  |
| H  | 0.76612  | 4.95904  | -0.38259 |
| H  | -0.49273 | 4.16233  | 0.56722  |
| C  | 0.31389  | 2.00242  | -1.74008 |
| H  | -0.75440 | 1.87342  | -1.55498 |
| H  | 0.43225  | 2.76384  | -2.51498 |
| H  | 0.71011  | 1.06457  | -2.13173 |
| C  | 3.04807  | 2.59537  | -0.49503 |
| H  | 3.58104  | 2.90273  | 0.40706  |
| H  | 3.42903  | 1.61844  | -0.79727 |
| H  | 3.28467  | 3.30998  | -1.28677 |
| C  | -1.83617 | -0.28474 | 0.43390  |
| H  | -2.13165 | -0.48514 | 1.46630  |
| H  | -1.80504 | 0.80014  | 0.31237  |
| C  | -2.88377 | -0.84841 | -0.49801 |
| H  | -2.62908 | -0.63345 | -1.53918 |
| H  | -2.97289 | -1.93120 | -0.37687 |

|    |          |          |          |
|----|----------|----------|----------|
| C  | -5.18351 | -0.66921 | -0.96116 |
| C  | -6.50723 | -0.13877 | -0.60582 |
| H  | -6.44209 | 0.93482  | -0.40929 |
| H  | -7.19108 | -0.30213 | -1.44060 |
| O  | -4.14747 | -0.24377 | -0.19848 |
| O  | -7.02123 | -0.80190 | 0.57469  |
| Si | 0.90014  | -0.16725 | 1.19672  |
| C  | 0.66409  | -0.55596 | 2.99278  |
| H  | -0.27915 | -0.14673 | 3.35937  |
| H  | 0.64982  | -1.63590 | 3.15254  |
| H  | 1.47313  | -0.13386 | 3.59185  |
| H  | -7.87783 | -0.41462 | 0.77263  |
| H  | -5.05063 | -1.59141 | -1.51427 |

TriSil-1n-reduced-e.log      Energy: -1032636.2360835

|    |          |          |          |
|----|----------|----------|----------|
| C  | -0.33845 | -0.96119 | 0.16725  |
| H  | -0.21664 | -2.03762 | 0.32682  |
| H  | -0.21180 | -0.79315 | -0.90494 |
| O  | 2.47227  | -0.32669 | 0.32081  |
| O  | 0.75306  | 1.54658  | 1.05784  |
| Si | 3.16242  | -1.59518 | -0.50789 |
| Si | 0.79435  | 2.66823  | -0.17657 |
| C  | 2.86448  | -3.17471 | 0.43845  |
| H  | 1.79725  | -3.38761 | 0.52985  |
| H  | 3.33066  | -4.01950 | -0.07385 |
| H  | 3.28813  | -3.11456 | 1.44294  |
| C  | 4.98121  | -1.21731 | -0.62153 |
| H  | 5.50627  | -2.00779 | -1.16216 |
| H  | 5.14996  | -0.27731 | -1.15104 |
| H  | 5.42682  | -1.13324 | 0.37157  |
| C  | 2.41189  | -1.69819 | -2.21128 |
| H  | 1.35337  | -1.95949 | -2.16822 |
| H  | 2.50884  | -0.74641 | -2.73764 |
| H  | 2.92262  | -2.46233 | -2.80226 |
| C  | -0.37600 | 4.03087  | 0.31076  |
| H  | -0.07970 | 4.48170  | 1.26001  |
| H  | -0.38899 | 4.81735  | -0.44691 |
| H  | -1.39298 | 3.64792  | 0.41805  |
| C  | 0.25054  | 1.87827  | -1.77773 |
| H  | -0.76180 | 1.47666  | -1.70153 |

|    |          |          |          |
|----|----------|----------|----------|
| H  | 0.25762  | 2.62471  | -2.57573 |
| H  | 0.92105  | 1.06823  | -2.07255 |
| C  | 2.53819  | 3.30402  | -0.34130 |
| H  | 2.88862  | 3.73903  | 0.59681  |
| H  | 3.21852  | 2.49560  | -0.61646 |
| H  | 2.59718  | 4.07406  | -1.11380 |
| C  | -1.74114 | -0.52258 | 0.59523  |
| H  | -1.89083 | -0.70491 | 1.66240  |
| H  | -1.86186 | 0.55148  | 0.43442  |
| C  | -2.81199 | -1.25436 | -0.18532 |
| H  | -2.68122 | -1.07672 | -1.26005 |
| H  | -2.73669 | -2.33532 | -0.01500 |
| C  | -5.14733 | -1.45719 | -0.49591 |
| H  | -5.09874 | -2.53153 | -0.29425 |
| H  | -4.99352 | -1.29967 | -1.57005 |
| C  | -6.46065 | -0.94242 | -0.08724 |
| H  | -6.97036 | -1.27006 | 0.80860  |
| O  | -4.09240 | -0.79451 | 0.22048  |
| O  | -6.80760 | 0.28101  | -0.59450 |
| Si | 1.03008  | -0.07648 | 1.07705  |
| C  | 1.13698  | -0.61770 | 2.84605  |
| H  | 0.20060  | -0.42238 | 3.37219  |
| H  | 1.33790  | -1.68989 | 2.89923  |
| H  | 1.93873  | -0.09425 | 3.36990  |
| H  | -7.62396 | 0.57874  | -0.18432 |

TriSil-1n-reduced-f.log      Energy: -1032625.2590227

|    |          |          |          |
|----|----------|----------|----------|
| C  | -0.41831 | -0.83915 | 0.17807  |
| H  | -0.39629 | -1.92148 | 0.34193  |
| H  | -0.26709 | -0.68693 | -0.89325 |
| O  | 2.44156  | -0.50700 | 0.40023  |
| O  | 0.91497  | 1.56273  | 1.03040  |
| Si | 3.00754  | -1.80267 | -0.47703 |
| Si | 1.14393  | 2.63120  | -0.23075 |
| C  | 2.50900  | -3.38064 | 0.38316  |
| H  | 1.42240  | -3.47550 | 0.43670  |
| H  | 2.89429  | -4.24934 | -0.15559 |
| H  | 2.90484  | -3.41201 | 1.40030  |
| C  | 4.85952  | -1.62503 | -0.53013 |
| H  | 5.30923  | -2.44011 | -1.10135 |

|    |          |          |          |
|----|----------|----------|----------|
| H  | 5.14466  | -0.68358 | -1.00444 |
| H  | 5.28426  | -1.64197 | 0.47544  |
| C  | 2.30279  | -1.74015 | -2.20183 |
| H  | 1.22052  | -1.87869 | -2.20056 |
| H  | 2.52579  | -0.78341 | -2.67850 |
| H  | 2.74173  | -2.53088 | -2.81517 |
| C  | 0.25074  | 4.19444  | 0.24206  |
| H  | 0.63975  | 4.60013  | 1.17817  |
| H  | 0.37108  | 4.95602  | -0.53144 |
| H  | -0.81763 | 4.00843  | 0.36967  |
| C  | 0.43630  | 1.91947  | -1.80419 |
| H  | -0.62142 | 1.67384  | -1.69021 |
| H  | 0.52831  | 2.64910  | -2.61239 |
| H  | 0.96862  | 1.01595  | -2.10853 |
| C  | 2.97051  | 2.93852  | -0.43736 |
| H  | 3.41388  | 3.31094  | 0.48829  |
| H  | 3.48870  | 2.01940  | -0.71754 |
| H  | 3.14891  | 3.68013  | -1.21940 |
| C  | -1.77974 | -0.27481 | 0.59121  |
| H  | -1.95475 | -0.43814 | 1.65750  |
| H  | -1.80380 | 0.80460  | 0.42376  |
| C  | -2.90293 | -0.91474 | -0.19529 |
| H  | -2.75644 | -0.74713 | -1.26900 |
| H  | -2.92231 | -1.99743 | -0.02403 |
| C  | -5.23514 | -0.89681 | -0.50189 |
| H  | -5.30105 | -1.97702 | -0.33256 |
| H  | -5.12218 | -0.72174 | -1.57728 |
| C  | -6.49589 | -0.22049 | -0.00123 |
| H  | -6.62327 | -0.34946 | 1.08825  |
| H  | -6.44654 | 0.87604  | -0.12218 |
| O  | -4.14269 | -0.34954 | 0.20614  |
| O  | -7.64445 | -0.65273 | -0.60453 |
| Si | 1.01451  | -0.07976 | 1.10160  |
| C  | 1.01802  | -0.57836 | 2.88598  |
| H  | 0.09446  | -0.27401 | 3.38197  |
| H  | 1.10642  | -1.66376 | 2.97038  |
| H  | 1.85672  | -0.12595 | 3.41813  |

TriSil-1n-reduced-g.log      Energy: -1032627.9634692

|   |          |          |          |
|---|----------|----------|----------|
| C | -0.70154 | -1.04322 | -0.42698 |
|---|----------|----------|----------|

|    |          |          |          |
|----|----------|----------|----------|
| H  | -0.72650 | -2.13092 | -0.54831 |
| H  | -0.64823 | -0.62346 | -1.43544 |
| O  | 2.10997  | -0.93184 | -0.56132 |
| O  | 0.88649  | 0.98136  | 0.88547  |
| Si | 3.72884  | -1.24754 | -0.28997 |
| Si | 0.92671  | 2.40049  | 0.01058  |
| C  | 4.32444  | -0.28886 | 1.19515  |
| H  | 3.80673  | -0.60328 | 2.10401  |
| H  | 5.39324  | -0.46079 | 1.34391  |
| H  | 4.16990  | 0.78334  | 1.06625  |
| C  | 4.63333  | -0.71474 | -1.82656 |
| H  | 5.70163  | -0.92277 | -1.73467 |
| H  | 4.26049  | -1.24565 | -2.70474 |
| H  | 4.51154  | 0.35665  | -1.99871 |
| C  | 3.92440  | -3.07597 | 0.01010  |
| H  | 3.36485  | -3.38032 | 0.89754  |
| H  | 3.55878  | -3.65681 | -0.83899 |
| H  | 4.97440  | -3.33204 | 0.16864  |
| C  | 0.13173  | 3.69882  | 1.08079  |
| H  | 0.66147  | 3.80166  | 2.02993  |
| H  | 0.14380  | 4.66957  | 0.58046  |
| H  | -0.90756 | 3.44265  | 1.29642  |
| C  | -0.01799 | 2.19515  | -1.58528 |
| H  | -1.05177 | 1.89583  | -1.40237 |
| H  | -0.03238 | 3.14386  | -2.12731 |
| H  | 0.44692  | 1.44941  | -2.23297 |
| C  | 2.70169  | 2.83292  | -0.35629 |
| H  | 3.27824  | 2.95884  | 0.56194  |
| H  | 3.17806  | 2.05551  | -0.95688 |
| H  | 2.75292  | 3.76927  | -0.91713 |
| C  | -1.97098 | -0.56378 | 0.27928  |
| H  | -2.03680 | -1.00193 | 1.27875  |
| H  | -1.94348 | 0.52097  | 0.40757  |
| C  | -3.21344 | -0.93061 | -0.50251 |
| H  | -3.17656 | -0.48372 | -1.50340 |
| H  | -3.28150 | -2.01826 | -0.62364 |
| C  | -5.56075 | -0.78256 | -0.48578 |
| H  | -5.65965 | -1.86974 | -0.58205 |
| H  | -5.56303 | -0.34871 | -1.49211 |
| C  | -6.71264 | -0.22765 | 0.32126  |

|    |          |          |          |
|----|----------|----------|----------|
| H  | -6.69728 | -0.65391 | 1.32759  |
| H  | -6.61923 | 0.85825  | 0.40178  |
| O  | -4.36093 | -0.45724 | 0.18608  |
| O  | -7.91453 | -0.57947 | -0.35433 |
| Si | 0.86815  | -0.60995 | 0.47367  |
| C  | 1.04638  | -1.55541 | 2.03898  |
| H  | 1.22676  | -1.08564 | 2.99933  |
| H  | 0.95856  | -2.63637 | 2.07194  |
| H  | -8.65178 | -0.22046 | 0.14244  |

methyl\_radical.log Energy: -24995.5223725

|   |          |          |          |
|---|----------|----------|----------|
| C | -0.00001 | 0.00003  | -0.00028 |
| H | -0.96685 | 0.48112  | 0.00057  |
| H | 0.90024  | 0.59651  | 0.00057  |
| H | 0.06664  | -1.07784 | 0.00057  |

PDMS\_a.log Energy: -839548.0387342

|    |          |          |          |
|----|----------|----------|----------|
| C  | 0.24571  | 1.83278  | 1.61069  |
| H  | 1.28377  | 2.13315  | 1.76880  |
| H  | 0.01335  | 1.02684  | 2.30817  |
| O  | 0.82164  | -0.08274 | -0.46028 |
| O  | -1.60911 | 0.92990  | -0.40992 |
| Si | 2.33835  | -0.62166 | -0.02754 |
| Si | -2.47653 | -0.45202 | -0.04406 |
| C  | 3.55457  | 0.77656  | -0.24059 |
| H  | 3.32128  | 1.60914  | 0.42686  |
| H  | 4.56991  | 0.44245  | -0.01540 |
| H  | 3.54055  | 1.14952  | -1.26694 |
| C  | 2.73339  | -2.03947 | -1.16586 |
| H  | 3.71216  | -2.46289 | -0.93025 |
| H  | 1.98999  | -2.83329 | -1.06733 |
| H  | 2.74756  | -1.71365 | -2.20774 |
| C  | 2.29271  | -1.19464 | 1.74550  |
| H  | 2.06880  | -0.36962 | 2.42380  |
| H  | 1.53435  | -1.96781 | 1.88523  |
| H  | 3.25887  | -1.61523 | 2.03437  |
| C  | -4.26950 | 0.04635  | -0.02077 |
| H  | -4.57775 | 0.44512  | -0.98935 |
| H  | -4.90279 | -0.81422 | 0.20587  |
| H  | -4.45409 | 0.81026  | 0.73707  |

|    |          |          |          |
|----|----------|----------|----------|
| C  | -1.94501 | -1.09620 | 1.62468  |
| H  | -2.11136 | -0.35375 | 2.40743  |
| H  | -2.52014 | -1.98926 | 1.88036  |
| H  | -0.88698 | -1.36681 | 1.62826  |
| C  | -2.16442 | -1.73363 | -1.36021 |
| H  | -2.41445 | -1.34775 | -2.35053 |
| H  | -1.11684 | -2.03935 | -1.36733 |
| H  | -2.77564 | -2.62107 | -1.18043 |
| Si | -0.02696 | 1.29622  | -0.14501 |
| C  | 0.46048  | 2.61671  | -1.32313 |
| H  | 0.02665  | 2.71989  | -2.31208 |
| H  | 1.24795  | 3.32793  | -1.09689 |
| H  | -0.39077 | 2.68683  | 1.85030  |

PDMS\_b.log Energy: -839548.4265287

|    |          |          |          |
|----|----------|----------|----------|
| C  | 0.21053  | 1.71396  | 1.73171  |
| H  | 1.25507  | 1.96756  | 1.92419  |
| H  | -0.06130 | 0.87232  | 2.37034  |
| O  | 0.81340  | -0.00655 | -0.50686 |
| O  | -1.65274 | 0.93185  | -0.30317 |
| Si | 2.28634  | -0.63926 | -0.05670 |
| Si | -2.44326 | -0.52304 | -0.08786 |
| C  | 3.55551  | 0.72790  | -0.04997 |
| H  | 3.29751  | 1.50561  | 0.67212  |
| H  | 4.53864  | 0.33510  | 0.21950  |
| H  | 3.63653  | 1.19087  | -1.03551 |
| C  | 2.70707  | -1.93647 | -1.32284 |
| H  | 3.66051  | -2.41307 | -1.08480 |
| H  | 1.93988  | -2.71301 | -1.35157 |
| H  | 2.78720  | -1.49971 | -2.32021 |
| C  | 2.13656  | -1.40310 | 1.63706  |
| H  | 1.87056  | -0.65786 | 2.38853  |
| H  | 1.37578  | -2.18619 | 1.64665  |
| H  | 3.08664  | -1.85477 | 1.93260  |
| C  | -4.26017 | -0.12891 | -0.18589 |
| H  | -4.51500 | 0.29949  | -1.15716 |
| H  | -4.86018 | -1.03021 | -0.04562 |
| H  | -4.53960 | 0.58901  | 0.58831  |
| C  | -1.99392 | -1.25207 | 1.56715  |
| H  | -2.25672 | -0.57319 | 2.38047  |

|    |          |          |          |
|----|----------|----------|----------|
| H  | -2.53255 | -2.18981 | 1.72245  |
| H  | -0.92485 | -1.46475 | 1.62980  |
| C  | -1.94229 | -1.68726 | -1.42717 |
| H  | -2.02690 | -1.43981 | -2.48084 |
| H  | -1.52169 | -2.66764 | -1.22861 |
| Si | -0.06533 | 1.31559  | -0.06218 |
| C  | 0.36182  | 2.74559  | -1.15952 |
| H  | -0.24919 | 3.61866  | -0.92253 |
| H  | 1.41053  | 3.02108  | -1.02810 |
| H  | 0.20538  | 2.49273  | -2.20973 |
| H  | -0.40076 | 2.57144  | 2.02127  |

PDMS\_c.log Energy: -839548.4172228

|    |          |          |          |
|----|----------|----------|----------|
| C  | 0.20927  | 1.77195  | 1.68782  |
| H  | 1.25246  | 2.04052  | 1.86762  |
| H  | -0.05122 | 0.94663  | 2.35171  |
| O  | 0.80243  | -0.02250 | -0.49255 |
| O  | -1.65191 | 0.94006  | -0.33773 |
| Si | 2.27550  | -0.65049 | -0.03863 |
| Si | -2.48060 | -0.47708 | -0.05434 |
| C  | 3.55928  | 0.70023  | -0.12176 |
| H  | 3.32267  | 1.51357  | 0.56783  |
| H  | 4.54361  | 0.31034  | 0.14749  |
| H  | 3.62539  | 1.11575  | -1.12928 |
| C  | 2.65195  | -2.01396 | -1.24768 |
| H  | 3.60250  | -2.49438 | -1.00589 |
| H  | 1.87199  | -2.77792 | -1.22300 |
| H  | 2.71781  | -1.62744 | -2.26660 |
| C  | 2.15106  | -1.32876 | 1.69325  |
| H  | 1.91607  | -0.54341 | 2.41355  |
| H  | 1.37705  | -2.09605 | 1.75830  |
| H  | 3.09970  | -1.78338 | 1.98896  |
| C  | -4.26768 | -0.03871 | -0.08117 |
| H  | -5.04658 | -0.79129 | -0.15162 |
| H  | -4.63038 | 0.98021  | 0.00405  |
| C  | -1.98174 | -1.17198 | 1.60647  |
| H  | -2.17636 | -0.46349 | 2.41302  |
| H  | -2.54267 | -2.08588 | 1.81459  |
| H  | -0.91803 | -1.42123 | 1.61444  |
| C  | -2.09555 | -1.72340 | -1.38666 |



|    |          |          |          |
|----|----------|----------|----------|
| H  | -2.26857 | -1.30838 | -2.38103 |
| H  | -1.05353 | -2.04247 | -1.32396 |
| H  | -2.72889 | -2.60623 | -1.27334 |
| Si | -0.06461 | 1.32052  | -0.09340 |
| C  | 0.37944  | 2.71291  | -1.23164 |
| H  | -0.22102 | 3.59987  | -1.02072 |
| H  | 1.43137  | 2.97936  | -1.10735 |
| H  | 0.22055  | 2.43161  | -2.27420 |
| H  | -0.40824 | 2.63214  | 1.95510  |

PDMS\_cation.log      Energy: -814793.0299409

|    |          |          |          |
|----|----------|----------|----------|
| O  | 0.86378  | 0.04936  | 0.17878  |
| O  | -1.60748 | 1.04095  | 0.03565  |
| Si | 2.47325  | -0.53026 | -0.01176 |
| Si | -2.57189 | -0.39894 | -0.00040 |
| C  | 3.47895  | 0.88681  | -0.65688 |
| H  | 3.48298  | 1.72295  | 0.04467  |
| H  | 4.51284  | 0.56646  | -0.80350 |
| H  | 3.09806  | 1.23879  | -1.61741 |
| C  | 2.31025  | -1.92119 | -1.22120 |
| H  | 3.28723  | -2.36829 | -1.41667 |
| H  | 1.65295  | -2.69987 | -0.83092 |
| H  | 1.90369  | -1.56619 | -2.16961 |
| C  | 2.98906  | -1.07762 | 1.67820  |
| H  | 2.98820  | -0.23915 | 2.37663  |
| H  | 2.31906  | -1.84919 | 2.06067  |
| H  | 3.99946  | -1.49066 | 1.64546  |
| C  | -4.29681 | 0.22012  | -0.24464 |
| H  | -4.38502 | 0.77065  | -1.18255 |
| H  | -4.99336 | -0.62026 | -0.27728 |
| H  | -4.59607 | 0.87691  | 0.57368  |
| C  | -2.30733 | -1.22903 | 1.63419  |
| H  | -2.59846 | -0.57611 | 2.45855  |
| H  | -2.90984 | -2.13810 | 1.69267  |
| H  | -1.26067 | -1.50968 | 1.76523  |
| C  | -1.94174 | -1.40130 | -1.42708 |
| H  | -1.98553 | -0.82976 | -2.35588 |
| H  | -0.91094 | -1.72145 | -1.26366 |
| H  | -2.55585 | -2.29575 | -1.55221 |
| Si | -0.06166 | 1.30430  | 0.06669  |

|   |          |         |          |
|---|----------|---------|----------|
| C | 0.58991  | 2.98801 | -0.01689 |
| H | -0.22061 | 3.70971 | -0.09018 |
| H | 1.18706  | 3.18232 | 0.87595  |
| H | 1.24498  | 3.06795 | -0.88671 |

PDMS\_neutral\_B3LYP.log Energy: -840106.3264225

|    |          |          |          |
|----|----------|----------|----------|
| C  | 0.13362  | 1.84933  | 1.68315  |
| H  | 1.13766  | 2.23181  | 1.87743  |
| H  | -0.07142 | 1.05666  | 2.40392  |
| O  | 0.93974  | -0.09362 | -0.30161 |
| O  | -1.57611 | 0.77558  | -0.37857 |
| Si | 2.50359  | -0.61158 | -0.02295 |
| Si | -2.61652 | -0.48972 | -0.04653 |
| C  | 3.71607  | 0.72013  | -0.54160 |
| H  | 3.59942  | 1.62596  | 0.05641  |
| H  | 4.74208  | 0.36784  | -0.41121 |
| H  | 3.58676  | 0.98785  | -1.59192 |
| C  | 2.73581  | -2.15337 | -1.05705 |
| H  | 3.74052  | -2.56101 | -0.92607 |
| H  | 2.02103  | -2.92844 | -0.77337 |
| H  | 2.59714  | -1.93938 | -2.11869 |
| C  | 2.70858  | -1.00496 | 1.79749  |
| H  | 2.59609  | -0.11269 | 2.41576  |
| H  | 1.97114  | -1.73961 | 2.12689  |
| H  | 3.70098  | -1.41978 | 1.98905  |
| C  | -4.34424 | 0.16709  | -0.33959 |
| H  | -4.46150 | 0.51828  | -1.36684 |
| H  | -5.09070 | -0.61084 | -0.16516 |
| H  | -4.56746 | 1.00087  | 0.32915  |
| C  | -2.41560 | -1.03981 | 1.73402  |
| H  | -2.60527 | -0.21880 | 2.42784  |
| H  | -3.12465 | -1.83917 | 1.96252  |
| H  | -1.41216 | -1.42332 | 1.92698  |
| C  | -2.24796 | -1.90727 | -1.21403 |
| H  | -2.32986 | -1.58886 | -2.25530 |
| H  | -1.24092 | -2.29820 | -1.05959 |
| H  | -2.95304 | -2.72721 | -1.05916 |
| Si | -0.01873 | 1.23449  | -0.07258 |
| C  | 0.41003  | 2.55719  | -1.31314 |
| H  | -0.27379 | 3.40411  | -1.22733 |

|   |          |         |          |
|---|----------|---------|----------|
| H | 1.42427  | 2.92963 | -1.15990 |
| H | 0.34174  | 2.17124 | -2.33204 |
| H | -0.57187 | 2.66268 | 1.86545  |

PDMS\_neutral\_m062x.log Energy: -839886.7862170

|    |          |          |          |
|----|----------|----------|----------|
| C  | 0.24612  | 1.74106  | 1.69044  |
| H  | 1.29301  | 1.99104  | 1.87418  |
| H  | -0.03436 | 0.92541  | 2.35799  |
| O  | 0.79797  | -0.09109 | -0.46495 |
| O  | -1.62489 | 0.94869  | -0.34443 |
| Si | 2.31071  | -0.64404 | -0.03627 |
| Si | -2.46197 | -0.46745 | -0.05341 |
| C  | 3.53520  | 0.75363  | -0.19809 |
| H  | 3.29686  | 1.57501  | 0.48071  |
| H  | 4.54142  | 0.40412  | 0.04180  |
| H  | 3.54729  | 1.14362  | -1.21739 |
| C  | 2.71482  | -2.02560 | -1.21430 |
| H  | 3.69010  | -2.45814 | -0.98484 |
| H  | 1.96815  | -2.81881 | -1.14645 |
| H  | 2.73671  | -1.66493 | -2.24387 |
| C  | 2.26353  | -1.27371 | 1.71739  |
| H  | 2.00767  | -0.48031 | 2.42105  |
| H  | 1.53266  | -2.07708 | 1.82386  |
| H  | 3.24157  | -1.67025 | 1.99835  |
| C  | -4.26286 | -0.00760 | 0.03024  |
| H  | -4.59156 | 0.44480  | -0.90689 |
| H  | -4.87727 | -0.89094 | 0.21280  |
| H  | -4.44536 | 0.70503  | 0.83609  |
| C  | -1.88625 | -1.20168 | 1.56224  |
| H  | -2.07864 | -0.52361 | 2.39523  |
| H  | -2.41676 | -2.13585 | 1.75803  |
| H  | -0.81669 | -1.42159 | 1.53671  |
| C  | -2.15337 | -1.65851 | -1.45262 |
| H  | -2.41563 | -1.20668 | -2.41081 |
| H  | -1.10436 | -1.95551 | -1.48978 |
| H  | -2.75799 | -2.55880 | -1.32712 |
| Si | -0.03077 | 1.28616  | -0.08921 |
| C  | 0.46100  | 2.65857  | -1.23109 |
| H  | -0.15089 | 3.54494  | -1.05633 |
| H  | 1.50565  | 2.93263  | -1.07398 |

|   |          |         |          |
|---|----------|---------|----------|
| H | 0.33870  | 2.35784 | -2.27266 |
| H | -0.35571 | 2.61488 | 1.94757  |

PDMS\_neutral\_wb97xd.log Energy: -839972.4310437

|    |          |          |          |
|----|----------|----------|----------|
| C  | 0.24384  | 1.75435  | 1.69210  |
| H  | 1.28746  | 2.01923  | 1.87496  |
| H  | -0.01980 | 0.92647  | 2.35149  |
| O  | 0.84315  | -0.02414 | -0.49972 |
| O  | -1.61496 | 0.93546  | -0.34123 |
| Si | 2.31563  | -0.64873 | -0.03968 |
| Si | -2.45507 | -0.47864 | -0.05267 |
| C  | 3.59031  | 0.71275  | -0.07977 |
| H  | 3.33826  | 1.51175  | 0.62099  |
| H  | 4.57352  | 0.32468  | 0.19617  |
| H  | 3.66775  | 1.14704  | -1.07854 |
| C  | 2.72041  | -1.98487 | -1.27010 |
| H  | 3.66961  | -2.46484 | -1.02215 |
| H  | 1.94474  | -2.75355 | -1.27462 |
| H  | 2.80121  | -1.57688 | -2.27954 |
| C  | 2.17482  | -1.36209 | 1.67683  |
| H  | 1.91744  | -0.59398 | 2.40803  |
| H  | 1.41096  | -2.14126 | 1.71512  |
| H  | 3.12520  | -1.80893 | 1.97871  |
| C  | -4.26065 | -0.02567 | -0.05100 |
| H  | -4.55732 | 0.40475  | -1.00962 |
| H  | -4.87669 | -0.91012 | 0.12581  |
| H  | -4.48190 | 0.70174  | 0.73254  |
| C  | -1.94642 | -1.18237 | 1.59883  |
| H  | -2.14826 | -0.47984 | 2.40953  |
| H  | -2.50363 | -2.10012 | 1.80149  |
| H  | -0.88226 | -1.42690 | 1.61420  |
| C  | -2.08477 | -1.70102 | -1.41064 |
| H  | -2.30946 | -1.27743 | -2.39161 |
| H  | -1.03332 | -1.99333 | -1.39807 |
| H  | -2.68908 | -2.60271 | -1.28684 |
| Si | -0.02952 | 1.31376  | -0.09247 |
| C  | 0.41753  | 2.71505  | -1.21927 |
| H  | -0.18412 | 3.60015  | -1.00388 |
| H  | 1.46889  | 2.98127  | -1.08967 |
| H  | 0.26226  | 2.44144  | -2.26445 |

H -0.37183 2.61470 1.96317

PDMS\_ox\_B3LYP.log Energy: -839947.6322083

|    |          |          |          |
|----|----------|----------|----------|
| C  | 0.15229  | 2.05843  | 1.70825  |
| H  | 1.19411  | 2.35879  | 1.70626  |
| H  | -0.10647 | 1.20382  | 2.32560  |
| O  | 0.94260  | -0.07299 | -0.12090 |
| O  | -1.60036 | 0.80218  | -0.25190 |
| Si | 2.54758  | -0.64404 | -0.00511 |
| Si | -2.64823 | -0.53351 | -0.02534 |
| C  | 3.67199  | 0.62376  | -0.78245 |
| H  | 3.64817  | 1.56883  | -0.23745 |
| H  | 4.70221  | 0.26064  | -0.77274 |
| H  | 3.39572  | 0.81712  | -1.82023 |
| C  | 2.54353  | -2.25982 | -0.93287 |
| H  | 3.53458  | -2.71715 | -0.89547 |
| H  | 1.83149  | -2.96140 | -0.49567 |
| H  | 2.28034  | -2.11146 | -1.98127 |
| C  | 2.88358  | -0.86726 | 1.81528  |
| H  | 2.80534  | 0.08057  | 2.35011  |
| H  | 2.18094  | -1.57262 | 2.26155  |
| H  | 3.89311  | -1.25601 | 1.96551  |
| C  | -4.33964 | 0.11495  | -0.45610 |
| H  | -4.37612 | 0.46200  | -1.49008 |
| H  | -5.08875 | -0.67079 | -0.33842 |
| H  | -4.61874 | 0.94567  | 0.19426  |
| C  | -2.51361 | -1.03188 | 1.76809  |
| H  | -2.77853 | -0.20417 | 2.42774  |
| H  | -3.19645 | -1.85879 | 1.97558  |
| H  | -1.50367 | -1.36193 | 2.01593  |
| C  | -2.08455 | -1.88387 | -1.18192 |
| H  | -2.09958 | -1.54360 | -2.21873 |
| H  | -1.07340 | -2.21775 | -0.94463 |
| H  | -2.75140 | -2.74529 | -1.10211 |
| Si | -0.04644 | 1.17871  | -0.19129 |
| C  | 0.43204  | 2.61281  | -1.27389 |
| H  | -0.27181 | 3.43017  | -1.13507 |
| H  | 1.44391  | 2.93602  | -1.04272 |
| H  | 0.38103  | 2.24689  | -2.30258 |
| H  | -0.57840 | 2.85799  | 1.65506  |

PDMS\_ox\_m062x.log Energy: -839721.3631309

|    |          |          |          |
|----|----------|----------|----------|
| C  | 0.68944  | 2.46930  | 1.23336  |
| H  | 1.70951  | 2.65315  | 0.89980  |
| H  | 0.69425  | 2.18261  | 2.28808  |
| O  | 0.81908  | -0.24291 | 0.05183  |
| O  | -1.59883 | 0.82392  | 0.44493  |
| Si | 2.47830  | -0.63557 | -0.02449 |
| Si | -2.61184 | -0.48902 | 0.03051  |
| C  | 3.24173  | 0.50350  | -1.27537 |
| H  | 3.18150  | 1.54404  | -0.94917 |
| H  | 4.29638  | 0.25632  | -1.40996 |
| H  | 2.74564  | 0.41274  | -2.24305 |
| C  | 2.51597  | -2.41153 | -0.54426 |
| H  | 3.54483  | -2.76568 | -0.62330 |
| H  | 1.99537  | -3.03548 | 0.18363  |
| H  | 2.03548  | -2.53916 | -1.51530 |
| C  | 3.16046  | -0.36158 | 1.67865  |
| H  | 3.07571  | 0.68686  | 1.97039  |
| H  | 2.62796  | -0.96928 | 2.41160  |
| H  | 4.21625  | -0.63630 | 1.71221  |
| C  | -4.33095 | 0.11961  | 0.34854  |
| H  | -4.55207 | 0.99277  | -0.26660 |
| H  | -5.05811 | -0.65817 | 0.11023  |
| H  | -4.45693 | 0.39338  | 1.39684  |
| C  | -2.13430 | -1.90696 | 1.12670  |
| H  | -2.22025 | -1.63104 | 2.17858  |
| H  | -2.79120 | -2.75937 | 0.94447  |
| H  | -1.10799 | -2.22197 | 0.93263  |
| C  | -2.29858 | -0.85403 | -1.76276 |
| H  | -2.50474 | 0.02050  | -2.38192 |
| H  | -1.26389 | -1.16232 | -1.92654 |
| H  | -2.94693 | -1.66606 | -2.09704 |
| Si | -0.03632 | 1.07553  | 0.29502  |
| C  | 0.02779  | 2.00439  | -1.69909 |
| H  | -0.81427 | 2.67753  | -1.58355 |
| H  | 1.02068  | 2.43774  | -1.69992 |
| H  | -0.12453 | 1.08559  | -2.25705 |
| H  | 0.08397  | 3.36408  | 1.10171  |

PDMS\_ox\_wb97xd.log Energy: -839810.8068999

|    |          |          |          |
|----|----------|----------|----------|
| C  | 0.22598  | 1.79824  | 1.77573  |
| H  | 1.26417  | 2.11300  | 1.74611  |
| H  | 0.00340  | 0.84693  | 2.24954  |
| O  | 0.84895  | -0.11042 | -0.36150 |
| O  | -1.61892 | 0.90383  | -0.31694 |
| Si | 2.42349  | -0.65880 | -0.01613 |
| Si | -2.55321 | -0.50225 | -0.03677 |
| C  | 3.56657  | 0.78980  | -0.21614 |
| H  | 3.30777  | 1.59439  | 0.47562  |
| H  | 4.59505  | 0.48732  | -0.00750 |
| H  | 3.52886  | 1.18288  | -1.23360 |
| C  | 2.74068  | -2.00881 | -1.24345 |
| H  | 3.73169  | -2.43926 | -1.08540 |
| H  | 2.00363  | -2.80701 | -1.13961 |
| H  | 2.69512  | -1.62732 | -2.26479 |
| C  | 2.36704  | -1.27378 | 1.73287  |
| H  | 2.13504  | -0.46367 | 2.42648  |
| H  | 1.61274  | -2.05415 | 1.84756  |
| H  | 3.33453  | -1.69326 | 2.01735  |
| C  | -4.30686 | 0.09272  | -0.00703 |
| H  | -4.57785 | 0.55614  | -0.95723 |
| H  | -4.98642 | -0.74396 | 0.16774  |
| H  | -4.45734 | 0.82359  | 0.78933  |
| C  | -2.00548 | -1.20023 | 1.59500  |
| H  | -2.16100 | -0.48232 | 2.40224  |
| H  | -2.58149 | -2.09862 | 1.82714  |
| H  | -0.94871 | -1.47544 | 1.57366  |
| C  | -2.21214 | -1.66429 | -1.44234 |
| H  | -2.44613 | -1.19811 | -2.40097 |
| H  | -1.16482 | -1.97058 | -1.45264 |
| H  | -2.82651 | -2.56186 | -1.34356 |
| Si | -0.05460 | 1.19309  | -0.28323 |
| C  | 0.51366  | 2.72916  | -1.10833 |
| H  | -0.13109 | 3.56366  | -0.83966 |
| H  | 1.54415  | 2.94444  | -0.83231 |
| H  | 0.45505  | 2.55295  | -2.18563 |
| H  | -0.52627 | 2.57766  | 1.83550  |

PDMS\_reduced\_B3IYP.log Energy: -840118.7993781

|    |          |          |          |
|----|----------|----------|----------|
| C  | 0.02964  | 1.69374  | 1.70538  |
| H  | 0.98707  | 2.16793  | 1.93800  |
| H  | -0.10989 | 0.86089  | 2.39743  |
| O  | 1.04844  | -0.12753 | -0.30671 |
| O  | -1.51199 | 0.58572  | -0.48586 |
| Si | 2.63722  | -0.56561 | -0.02752 |
| Si | -2.72472 | -0.47928 | -0.05717 |
| C  | 3.78842  | 0.77336  | -0.66135 |
| H  | 3.66373  | 1.70738  | -0.10806 |
| H  | 4.82989  | 0.45685  | -0.54896 |
| H  | 3.61325  | 0.97935  | -1.72011 |
| C  | 2.91835  | -2.16104 | -0.96591 |
| H  | 3.94587  | -2.51330 | -0.83162 |
| H  | 2.24429  | -2.94643 | -0.61220 |
| H  | 2.74447  | -2.02505 | -2.03686 |
| C  | 2.91361  | -0.83508 | 1.80753  |
| H  | 2.79708  | 0.09077  | 2.37633  |
| H  | 2.20711  | -1.56897 | 2.20635  |
| H  | 3.92579  | -1.21302 | 1.98520  |
| C  | -4.23761 | 0.06563  | -1.01816 |
| H  | -4.05024 | 0.03704  | -2.09421 |
| H  | -5.08851 | -0.58748 | -0.80825 |
| H  | -4.52390 | 1.08636  | -0.75234 |
| C  | -3.06361 | -0.38273 | 1.78483  |
| H  | -3.28612 | 0.64093  | 2.09752  |
| H  | -3.92554 | -1.00713 | 2.03851  |
| H  | -2.21277 | -0.74091 | 2.36911  |
| C  | -2.23705 | -2.22343 | -0.54045 |
| H  | -1.99573 | -2.28657 | -1.60552 |
| H  | -1.36349 | -2.56513 | 0.02239  |
| H  | -3.05707 | -2.92003 | -0.33813 |
| Si | -0.00645 | 1.12532  | -0.07404 |
| C  | 0.39198  | 2.51889  | -1.24837 |
| H  | -0.34074 | 3.32470  | -1.15313 |
| H  | 1.37990  | 2.93835  | -1.04703 |
| H  | 0.37690  | 2.16814  | -2.28310 |
| H  | -0.75999 | 2.42750  | 1.89047  |

PDMS\_reduced\_wb97xd.log Energy: -839968.8028153

|   |         |         |         |
|---|---------|---------|---------|
| C | 0.19642 | 1.72918 | 1.69564 |
|---|---------|---------|---------|



|    |          |          |          |
|----|----------|----------|----------|
| H  | 1.22309  | 2.05716  | 1.88503  |
| H  | -0.02094 | 0.88726  | 2.35738  |
| O  | 0.85923  | -0.09220 | -0.43764 |
| O  | -1.60070 | 0.88170  | -0.39316 |
| Si | 2.38423  | -0.62794 | -0.03577 |
| Si | -2.52091 | -0.46891 | -0.05428 |
| C  | 3.61645  | 0.74416  | -0.32366 |
| H  | 3.41626  | 1.59943  | 0.32747  |
| H  | 4.63109  | 0.39301  | -0.11373 |
| H  | 3.58368  | 1.08909  | -1.36031 |
| C  | 2.73633  | -2.07781 | -1.14884 |
| H  | 3.72405  | -2.49685 | -0.93728 |
| H  | 1.99435  | -2.86706 | -1.00051 |
| H  | 2.71051  | -1.77953 | -2.19989 |
| C  | 2.41308  | -1.15765 | 1.75267  |
| H  | 2.26029  | -0.30912 | 2.42387  |
| H  | 1.63016  | -1.89518 | 1.95333  |
| H  | 3.37767  | -1.61339 | 1.99694  |
| C  | -4.29866 | 0.05728  | -0.23214 |
| H  | -4.50000 | 0.41493  | -1.24465 |
| H  | -4.96836 | -0.78267 | -0.03100 |
| H  | -4.54215 | 0.85954  | 0.46789  |
| C  | -2.17599 | -1.05153 | 1.68524  |
| H  | -2.37642 | -0.26315 | 2.41585  |
| H  | -2.81005 | -1.90948 | 1.92701  |
| H  | -1.13368 | -1.36338 | 1.79827  |
| C  | -2.12357 | -1.82033 | -1.27679 |
| H  | -2.23016 | -1.46245 | -2.30434 |
| H  | -1.10167 | -2.18332 | -1.14706 |
| H  | -2.80275 | -2.66679 | -1.14003 |
| Si | -0.02405 | 1.25809  | -0.09011 |
| C  | 0.45581  | 2.64001  | -1.22948 |
| H  | -0.16855 | 3.52100  | -1.05707 |
| H  | 1.49767  | 2.92747  | -1.06720 |
| H  | 0.34214  | 2.33635  | -2.27342 |
| H  | -0.47354 | 2.55380  | 1.95615  |

PDMS\_red\_m062x.log      Energy: -839897.6668045

|   |         |         |         |
|---|---------|---------|---------|
| C | 0.07008 | 1.46232 | 1.71734 |
| H | 1.04198 | 1.89877 | 1.96220 |

|    |          |          |          |
|----|----------|----------|----------|
| H  | -0.06878 | 0.57442  | 2.33572  |
| O  | 1.03346  | -0.18002 | -0.44134 |
| O  | -1.51947 | 0.60961  | -0.54265 |
| Si | 2.60691  | -0.55528 | -0.04981 |
| Si | -2.71445 | -0.44768 | -0.06996 |
| C  | 3.67829  | 0.94644  | -0.34374 |
| H  | 3.38832  | 1.77334  | 0.30852  |
| H  | 4.72541  | 0.70898  | -0.13978 |
| H  | 3.60151  | 1.28554  | -1.37915 |
| C  | 3.15088  | -1.95729 | -1.14885 |
| H  | 4.19528  | -2.21428 | -0.94771 |
| H  | 2.53519  | -2.84374 | -0.97782 |
| H  | 3.05764  | -1.68390 | -2.20276 |
| C  | 2.73836  | -1.05915 | 1.74281  |
| H  | 2.45015  | -0.24591 | 2.41154  |
| H  | 2.09667  | -1.91785 | 1.95293  |
| H  | 3.77070  | -1.33868 | 1.97325  |
| C  | -4.32290 | 0.36902  | -0.53954 |
| H  | -4.35824 | 0.56345  | -1.61312 |
| H  | -5.17076 | -0.26883 | -0.28273 |
| H  | -4.44277 | 1.32009  | -0.01743 |
| C  | -2.66362 | -0.72805 | 1.77456  |
| H  | -2.71389 | 0.21436  | 2.32372  |
| H  | -3.51954 | -1.34055 | 2.07034  |
| H  | -1.75379 | -1.25493 | 2.07117  |
| C  | -2.54434 | -2.06704 | -0.98051 |
| H  | -2.49337 | -1.90209 | -2.06031 |
| H  | -1.63462 | -2.59394 | -0.68255 |
| H  | -3.40530 | -2.70891 | -0.76942 |
| Si | 0.00011  | 1.05630  | -0.09689 |
| C  | 0.43193  | 2.54212  | -1.12181 |
| H  | -0.27643 | 3.35368  | -0.94070 |
| H  | 1.43371  | 2.90410  | -0.88462 |
| H  | 0.40245  | 2.29195  | -2.18444 |
| H  | -0.70144 | 2.19121  | 1.97685  |

hydroxide\_anion.log Energy: -47659.5421295

|   |          |          |          |
|---|----------|----------|----------|
| O | 0.00000  | 0.00000  | 0.10645  |
| H | -0.00000 | -0.00000 | -0.85159 |

hydroxyl\_radical.log Energy: -47530.5536898

|   |          |          |          |
|---|----------|----------|----------|
| O | 0.00000  | 0.00000  | 0.10797  |
| H | -0.00000 | -0.00000 | -0.86374 |

PEG\_3n\_neutral\_b3lyp.log Energy: -337679.7018048

|   |          |          |          |
|---|----------|----------|----------|
| C | 4.14432  | -0.51726 | -0.00007 |
| H | 4.11088  | -1.15334 | -0.88731 |
| H | 4.11093  | -1.15320 | 0.88726  |
| C | 2.96647  | 0.43529  | -0.00011 |
| H | 2.99777  | 1.07534  | -0.88765 |
| H | 2.99781  | 1.07545  | 0.88735  |
| O | 5.33611  | 0.28071  | -0.00018 |
| O | 1.77312  | -0.34342 | -0.00003 |
| C | 0.59903  | 0.46410  | -0.00002 |
| H | 0.58303  | 1.10429  | 0.88753  |
| H | 0.58299  | 1.10426  | -0.88759 |
| C | -0.59903 | -0.46410 | 0.00002  |
| H | -0.58303 | -1.10428 | -0.88753 |
| H | -0.58298 | -1.10426 | 0.88758  |
| O | -1.77312 | 0.34342  | 0.00005  |
| C | -2.96647 | -0.43529 | 0.00008  |
| H | -2.99776 | -1.07540 | 0.88758  |
| H | -2.99782 | -1.07540 | -0.88742 |
| C | -4.14432 | 0.51726  | 0.00012  |
| H | -4.11088 | 1.15327  | 0.88740  |
| H | -4.11093 | 1.15328  | -0.88717 |
| O | -5.33611 | -0.28071 | 0.00015  |
| H | 6.09259  | -0.31490 | -0.00012 |
| H | -6.09259 | 0.31490  | 0.00017  |

PEG\_3n\_neutral\_m062x.log Energy: -337532.4159524

|   |         |          |          |
|---|---------|----------|----------|
| C | 4.12032 | -0.51657 | -0.00011 |
| H | 4.08353 | -1.15158 | -0.88765 |
| H | 4.08357 | -1.15157 | 0.88744  |
| C | 2.94263 | 0.42972  | -0.00009 |
| H | 2.97330 | 1.06905  | -0.88818 |
| H | 2.97335 | 1.06905  | 0.88800  |
| O | 5.29634 | 0.28393  | -0.00014 |
| O | 1.76056 | -0.34865 | -0.00005 |
| C | 0.59927 | 0.46012  | -0.00003 |

|   |          |          |          |
|---|----------|----------|----------|
| H | 0.58442  | 1.09942  | 0.88817  |
| H | 0.58437  | 1.09939  | -0.88825 |
| C | -0.59927 | -0.46012 | 0.00002  |
| H | -0.58442 | -1.09942 | -0.88818 |
| H | -0.58437 | -1.09939 | 0.88824  |
| O | -1.76056 | 0.34865  | 0.00003  |
| C | -2.94263 | -0.42972 | 0.00011  |
| H | -2.97330 | -1.06900 | 0.88823  |
| H | -2.97335 | -1.06910 | -0.88795 |
| C | -4.12032 | 0.51657  | 0.00009  |
| H | -4.08352 | 1.15163  | 0.88759  |
| H | -4.08358 | 1.15152  | -0.88750 |
| O | -5.29634 | -0.28393 | 0.00017  |
| H | 6.05869  | -0.30172 | -0.00014 |
| H | -6.05869 | 0.30172  | 0.00015  |

PEG\_3n\_neutral\_wb97xd.logEnergy: -337569.5516967

|   |          |          |          |
|---|----------|----------|----------|
| C | 4.12272  | -0.51431 | 0.00033  |
| H | 4.08514  | -1.15181 | -0.88657 |
| H | 4.08554  | -1.15014 | 0.88845  |
| C | 2.94516  | 0.43380  | -0.00030 |
| H | 2.97731  | 1.07396  | -0.88872 |
| H | 2.97745  | 1.07533  | 0.88711  |
| O | 5.30364  | 0.27873  | -0.00068 |
| O | 1.76226  | -0.34149 | 0.00038  |
| C | 0.59845  | 0.46187  | 0.00023  |
| H | 0.58061  | 1.10283  | 0.88816  |
| H | 0.58068  | 1.10260  | -0.88786 |
| C | -0.59845 | -0.46187 | 0.00027  |
| H | -0.58069 | -1.10265 | -0.88778 |
| H | -0.58059 | -1.10277 | 0.88824  |
| O | -1.76226 | 0.34149  | 0.00039  |
| C | -2.94516 | -0.43380 | -0.00029 |
| H | -2.97744 | -1.07534 | 0.88712  |
| H | -2.97731 | -1.07396 | -0.88871 |
| C | -4.12273 | 0.51431  | 0.00036  |
| H | -4.08556 | 1.15010  | 0.88850  |
| H | -4.08512 | 1.15185  | -0.88652 |
| O | -5.30364 | -0.27873 | -0.00072 |
| H | 6.05888  | -0.31182 | 0.00002  |

H -6.05888 0.31182 0.00005

PEG\_3n\_oxidized\_b3lyp.log Energy: -337530.0236572

C 3.96148 -0.02275 -0.16202  
H 4.24507 0.87865 0.38489  
H 4.17083 0.12535 -1.22252  
C 2.48500 -0.30117 0.03872  
H 2.26253 -0.46763 1.09584  
H 2.14316 -1.15256 -0.54741  
O 4.65799 -1.16592 0.33906  
O 1.76881 0.88087 -0.37375  
C 0.47613 0.74731 -0.72296  
H 0.13400 1.63508 -1.24292  
H 0.22254 -0.20615 -1.18383  
C -0.47617 0.74760 0.72289  
H -0.22253 -0.20566 1.18415  
H -0.13403 1.63559 1.24248  
O -1.76885 0.88098 0.37365  
C -2.48498 -0.30128 -0.03835  
H -2.14337 -1.15233 0.54839  
H -2.26222 -0.46837 -1.09530  
C -3.96151 -0.02266 0.16176  
H -4.17122 0.12599 1.22211  
H -4.24486 0.87847 -0.38572  
O -4.65791 -1.16605 -0.33898  
H 5.58774 -1.07383 0.10408  
H -5.58772 -1.07384 -0.10430

PEG\_3n\_oxidized\_m062x.log Energy: -337376.0093082

C -3.95899 0.38487 -0.28962  
H -3.85539 0.42932 -1.37515  
H -4.17288 1.38567 0.08881  
C -2.67700 -0.12938 0.32116  
H -2.44595 -1.13050 -0.04983  
H -2.72060 -0.14057 1.40989  
O -4.96858 -0.53543 0.09334  
O -1.62715 0.75765 -0.09137  
C -0.44253 0.59298 0.48475  
H 0.19046 1.46613 0.35047  
H -0.45159 0.12552 1.46608

|   |          |          |          |
|---|----------|----------|----------|
| C | 0.44260  | -0.59308 | -0.48509 |
| H | -0.19043 | -1.46621 | -0.35089 |
| H | 0.45174  | -0.12555 | -1.46639 |
| O | 1.62720  | -0.75791 | 0.09105  |
| C | 2.67702  | 0.12931  | -0.32113 |
| H | 2.44584  | 1.13029  | 0.05019  |
| H | 2.72069  | 0.14089  | -1.40986 |
| C | 3.95903  | -0.38493 | 0.28960  |
| H | 3.85527  | -0.42991 | 1.37509  |
| H | 4.17323  | -1.38551 | -0.08925 |
| O | 4.96842  | 0.53581  | -0.09279 |
| H | -5.80971 | -0.22044 | -0.25039 |
| H | 5.80951  | 0.22118  | 0.25135  |

PEG\_3n\_oxidized\_wb97xd.log      Energy: -337417.2597488

|   |          |          |          |
|---|----------|----------|----------|
| C | 3.70309  | 0.18286  | 0.24752  |
| H | 4.04393  | -0.84495 | 0.10415  |
| H | 3.86285  | 0.46604  | 1.28994  |
| C | 2.23344  | 0.28302  | -0.09166 |
| H | 2.05993  | 0.01081  | -1.13523 |
| H | 1.84045  | 1.28156  | 0.09833  |
| O | 4.37439  | 1.07151  | -0.63138 |
| O | 1.54160  | -0.66226 | 0.73699  |
| C | 0.22715  | -0.52367 | 0.85635  |
| H | -0.15900 | -1.10479 | 1.68665  |
| H | -0.15419 | 0.49018  | 0.74100  |
| C | -0.53079 | -1.34837 | -0.51509 |
| H | -0.13833 | -0.76527 | -1.34795 |
| H | -0.15854 | -2.36029 | -0.40053 |
| O | -1.84399 | -1.29210 | -0.34070 |
| C | -2.53261 | -0.09891 | -0.75218 |
| H | -3.22136 | -0.39842 | -1.54087 |
| H | -1.81897 | 0.62637  | -1.14179 |
| C | -3.28217 | 0.44076  | 0.44835  |
| H | -3.96383 | -0.32336 | 0.82778  |
| H | -2.57439 | 0.70448  | 1.23774  |
| O | -3.99251 | 1.58192  | -0.00363 |
| H | 5.30794  | 1.06166  | -0.41145 |
| H | -4.47105 | 1.94928  | 0.74217  |

PEG\_3n\_reduced\_b3lyp.log Energy: -337685.3365863

|   |          |          |          |
|---|----------|----------|----------|
| C | -4.14441 | 0.50584  | -0.00532 |
| H | -4.08690 | 1.16806  | -0.87387 |
| H | -4.13050 | 1.12415  | 0.89672  |
| C | -2.97215 | -0.44924 | -0.00132 |
| H | -2.97851 | -1.07349 | -0.90007 |
| H | -3.00876 | -1.10512 | 0.87389  |
| O | -5.35554 | -0.26975 | -0.05478 |
| O | -1.77518 | 0.33839  | 0.03232  |
| C | -0.59720 | -0.46564 | 0.03528  |
| H | -0.58112 | -1.10659 | 0.92250  |
| H | -0.57740 | -1.10624 | -0.85203 |
| C | 0.59720  | 0.46564  | 0.03534  |
| H | 0.57744  | 1.10629  | -0.85194 |
| H | 0.58107  | 1.10654  | 0.92259  |
| O | 1.77518  | -0.33839 | 0.03240  |
| C | 2.97215  | 0.44924  | -0.00113 |
| H | 3.00872  | 1.10506  | 0.87413  |
| H | 2.97856  | 1.07355  | -0.89984 |
| C | 4.14441  | -0.50584 | -0.00513 |
| H | 4.13045  | -1.12421 | 0.89687  |
| H | 4.08695  | -1.16800 | -0.87373 |
| O | 5.35554  | 0.26975  | -0.05447 |
| H | -6.10520 | 0.36693  | -0.06284 |
| H | 6.10521  | -0.36693 | -0.06254 |

PEG\_3n\_reduced\_m062x.log Energy: -337526.4602286

|   |          |          |          |
|---|----------|----------|----------|
| C | 4.11599  | -0.50647 | 0.00522  |
| H | 4.09296  | -1.13230 | -0.89169 |
| H | 4.05948  | -1.16189 | 0.87927  |
| C | 2.94403  | 0.44448  | 0.00009  |
| H | 2.97995  | 1.09440  | -0.87991 |
| H | 2.95675  | 1.07334  | 0.89586  |
| O | 5.30822  | 0.27222  | 0.04113  |
| O | 1.76154  | -0.33969 | -0.02417 |
| C | 0.59636  | 0.46331  | -0.02793 |
| H | 0.57576  | 1.10357  | 0.85959  |
| H | 0.57995  | 1.10259  | -0.91626 |
| C | -0.59636 | -0.46331 | -0.02788 |
| H | -0.57999 | -1.10264 | -0.91617 |

|   |          |          |          |
|---|----------|----------|----------|
| H | -0.57571 | -1.10352 | 0.85968  |
| O | -1.76154 | 0.33969  | -0.02411 |
| C | -2.94403 | -0.44448 | 0.00027  |
| H | -2.95670 | -1.07328 | 0.89610  |
| H | -2.98000 | -1.09446 | -0.87968 |
| C | -4.11599 | 0.50647  | 0.00541  |
| H | -4.05943 | 1.16195  | 0.87940  |
| H | -4.09301 | 1.13223  | -0.89156 |
| O | -5.30821 | -0.27222 | 0.04144  |
| H | 6.05774  | -0.35209 | 0.04986  |
| H | -6.05774 | 0.35209  | 0.05017  |

PEG\_3n\_reduced\_wb97xd.log      Energy: -337560.0588884

|   |          |          |          |
|---|----------|----------|----------|
| C | -4.12752 | -0.51468 | 0.00017  |
| H | -4.09548 | -1.15168 | 0.88763  |
| H | -4.09533 | -1.15217 | -0.88694 |
| C | -2.94228 | 0.42445  | 0.00001  |
| H | -2.96827 | 1.06638  | 0.88854  |
| H | -2.96821 | 1.06599  | -0.88881 |
| O | -5.30292 | 0.28872  | -0.00015 |
| O | -1.76291 | -0.35742 | 0.00021  |
| C | -0.60441 | 0.45633  | 0.00019  |
| H | -0.58857 | 1.09788  | -0.89306 |
| H | -0.58853 | 1.09788  | 0.89343  |
| C | 0.60441  | -0.45633 | 0.00015  |
| H | 0.58858  | -1.09789 | 0.89338  |
| H | 0.58852  | -1.09786 | -0.89311 |
| O | 1.76291  | 0.35742  | 0.00013  |
| C | 2.94228  | -0.42445 | -0.00019 |
| H | 2.96816  | -1.06594 | -0.88904 |
| H | 2.96832  | -1.06644 | 0.88830  |
| C | 4.12752  | 0.51468  | -0.00003 |
| H | 4.09528  | 1.15223  | -0.88709 |
| H | 4.09553  | 1.15162  | 0.88748  |
| O | 5.30292  | -0.28872 | -0.00047 |
| H | -6.06243 | -0.29625 | 0.00002  |
| H | 6.06243  | 0.29625  | -0.00026 |

PEG\_1n\_neutral\_wb97xd.log      Energy: -144501.8611893

|   |          |          |          |
|---|----------|----------|----------|
| C | -0.57482 | -0.49071 | -0.00000 |
|---|----------|----------|----------|



|   |          |          |          |
|---|----------|----------|----------|
| H | -0.51747 | -1.12666 | 0.88733  |
| H | -0.51749 | -1.12664 | -0.88735 |
| C | 0.57482  | 0.49071  | 0.00000  |
| H | 0.51749  | 1.12663  | 0.88735  |
| H | 0.51747  | 1.12666  | -0.88733 |
| O | -1.78090 | 0.26283  | 0.00002  |
| O | 1.78090  | -0.26283 | -0.00003 |
| H | -2.51643 | -0.35216 | 0.00004  |
| H | 2.51643  | 0.35216  | -0.00003 |

PEG\_1n\_wB97XD\_ox.log Energy: -144347.4131421

|   |          |          |          |
|---|----------|----------|----------|
| C | 0.72454  | 0.56672  | -0.03389 |
| H | 0.52284  | 1.09705  | 0.89247  |
| H | 0.53886  | 1.07575  | -0.97269 |
| C | -0.72449 | -0.56644 | -0.03384 |
| H | -0.52246 | -1.09677 | 0.89250  |
| H | -0.53848 | -1.07566 | -0.97251 |
| O | 1.81295  | -0.18540 | -0.06739 |
| O | -1.81306 | 0.18519  | -0.06740 |
| H | 2.08631  | -0.44501 | 0.82247  |
| H | -2.08655 | 0.44470  | 0.82244  |

PEG\_2n\_neutral\_wb97xd.log Energy: -241035.7008760

|   |          |          |          |
|---|----------|----------|----------|
| C | -2.36314 | 0.50816  | 0.00001  |
| H | -2.33402 | 1.14534  | -0.88746 |
| H | -2.33402 | 1.14530  | 0.88751  |
| C | -1.17330 | -0.42453 | -0.00001 |
| H | -1.19763 | -1.06583 | -0.88789 |
| H | -1.19762 | -1.06586 | 0.88784  |
| O | -3.53311 | -0.30013 | -0.00001 |
| O | 0.00000  | 0.36506  | -0.00000 |
| C | 1.17330  | -0.42453 | 0.00001  |
| H | 1.19763  | -1.06583 | 0.88788  |
| H | 1.19762  | -1.06586 | -0.88784 |
| C | 2.36314  | 0.50816  | -0.00001 |
| H | 2.33402  | 1.14530  | -0.88751 |
| H | 2.33402  | 1.14534  | 0.88746  |
| O | 3.53311  | -0.30013 | 0.00001  |
| H | -4.29636 | 0.28000  | 0.00001  |
| H | 4.29636  | 0.28000  | -0.00001 |

PEG\_2n\_wB97XD\_ox.log Energy: -240882.3674633

|   |          |          |          |
|---|----------|----------|----------|
| C | 2.15485  | 0.49739  | 0.41640  |
| H | 2.06997  | 0.22647  | 1.46225  |
| H | 1.61626  | 1.38074  | 0.07976  |
| C | 1.16574  | -0.78257 | -0.35337 |
| H | 1.73885  | -1.66021 | -0.07470 |
| H | 1.19830  | -0.46455 | -1.39348 |
| O | 3.40030  | 0.36596  | -0.03443 |
| O | -0.02135 | -0.77174 | 0.22738  |
| C | -0.99982 | 0.15892  | -0.26202 |
| H | -0.74407 | 1.14577  | 0.13032  |
| H | -0.96695 | 0.17372  | -1.35096 |
| C | -2.34246 | -0.29609 | 0.26269  |
| H | -2.58487 | -1.28006 | -0.14419 |
| H | -2.30443 | -0.36385 | 1.35219  |
| O | -3.28533 | 0.67660  | -0.15667 |
| H | 3.50912  | 0.80522  | -0.88790 |
| H | -4.15091 | 0.40439  | 0.15426  |

PEG\_3n\_neutral\_wb97xd.log Energy: -337569.5516967

|   |          |          |          |
|---|----------|----------|----------|
| C | -4.12272 | -0.51431 | -0.00033 |
| H | -4.08514 | -1.15181 | 0.88657  |
| H | -4.08554 | -1.15014 | -0.88845 |
| C | -2.94516 | 0.43380  | 0.00030  |
| H | -2.97731 | 1.07396  | 0.88872  |
| H | -2.97745 | 1.07533  | -0.88711 |
| O | -5.30364 | 0.27873  | 0.00068  |
| O | -1.76226 | -0.34149 | -0.00038 |
| C | -0.59845 | 0.46187  | -0.00023 |
| H | -0.58061 | 1.10283  | -0.88816 |
| H | -0.58068 | 1.10260  | 0.88786  |
| C | 0.59845  | -0.46187 | -0.00027 |
| H | 0.58069  | -1.10265 | 0.88778  |
| H | 0.58059  | -1.10277 | -0.88824 |
| O | 1.76226  | 0.34149  | -0.00039 |
| C | 2.94516  | -0.43380 | 0.00029  |
| H | 2.97744  | -1.07534 | -0.88712 |
| H | 2.97731  | -1.07396 | 0.88871  |
| C | 4.12273  | 0.51431  | -0.00036 |

|   |          |          |          |
|---|----------|----------|----------|
| H | 4.08556  | 1.15010  | -0.88850 |
| H | 4.08512  | 1.15185  | 0.88652  |
| O | 5.30364  | -0.27873 | 0.00072  |
| H | -6.05888 | -0.31182 | -0.00002 |
| H | 6.05888  | 0.31182  | -0.00005 |

PEG\_3n\_wB97XD\_ox.log Energy: -337417.2597488

|   |          |          |          |
|---|----------|----------|----------|
| C | 3.70309  | 0.18286  | 0.24752  |
| H | 4.04393  | -0.84495 | 0.10415  |
| H | 3.86285  | 0.46604  | 1.28994  |
| C | 2.23344  | 0.28302  | -0.09166 |
| H | 2.05993  | 0.01081  | -1.13523 |
| H | 1.84045  | 1.28156  | 0.09833  |
| O | 4.37439  | 1.07151  | -0.63138 |
| O | 1.54160  | -0.66226 | 0.73699  |
| C | 0.22715  | -0.52367 | 0.85635  |
| H | -0.15900 | -1.10479 | 1.68665  |
| H | -0.15419 | 0.49018  | 0.74100  |
| C | -0.53079 | -1.34837 | -0.51509 |
| H | -0.13833 | -0.76527 | -1.34795 |
| H | -0.15854 | -2.36029 | -0.40053 |
| O | -1.84399 | -1.29210 | -0.34070 |
| C | -2.53261 | -0.09891 | -0.75218 |
| H | -3.22136 | -0.39842 | -1.54087 |
| H | -1.81897 | 0.62637  | -1.14179 |
| C | -3.28217 | 0.44076  | 0.44835  |
| H | -3.96383 | -0.32336 | 0.82778  |
| H | -2.57439 | 0.70448  | 1.23774  |
| O | -3.99251 | 1.58192  | -0.00363 |
| H | 5.30794  | 1.06166  | -0.41145 |
| H | -4.47105 | 1.94928  | 0.74217  |

PEG\_4n\_neutral\_wb97xd.log Energy: -434103.4102332

|   |          |          |          |
|---|----------|----------|----------|
| C | -5.89774 | 0.47797  | 0.00043  |
| H | -5.87255 | 1.11564  | -0.88672 |
| H | -5.87251 | 1.11436  | 0.88851  |
| C | -4.70289 | -0.44808 | -0.00026 |
| H | -4.72351 | -1.08873 | -0.88866 |
| H | -4.72348 | -1.09000 | 0.88723  |
| O | -7.06362 | -0.33746 | -0.00014 |

|   |          |          |          |
|---|----------|----------|----------|
| O | -3.53401 | 0.34833  | 0.00029  |
| C | -2.35684 | -0.43518 | -0.00006 |
| H | -2.32835 | -1.07591 | 0.88775  |
| H | -2.32847 | -1.07531 | -0.88830 |
| C | -1.17413 | 0.50659  | 0.00019  |
| H | -1.20056 | 1.14703  | -0.88784 |
| H | -1.20063 | 1.14667  | 0.88847  |
| O | 0.00000  | -0.28175 | 0.00008  |
| C | 1.17413  | 0.50659  | -0.00010 |
| H | 1.20057  | 1.14708  | 0.88789  |
| H | 1.20062  | 1.14662  | -0.88842 |
| C | 2.35684  | -0.43518 | 0.00017  |
| H | 2.32850  | -1.07524 | 0.88846  |
| H | 2.32832  | -1.07597 | -0.88758 |
| C | 4.70289  | -0.44808 | 0.00024  |
| H | 4.72356  | -1.08871 | 0.88865  |
| H | 4.72344  | -1.09002 | -0.88723 |
| C | 5.89774  | 0.47797  | -0.00053 |
| H | 5.87260  | 1.11565  | 0.88662  |
| H | 5.87246  | 1.11435  | -0.88861 |
| H | 7.82996  | 0.23849  | -0.00024 |
| O | 7.06362  | -0.33746 | -0.00003 |
| O | 3.53401  | 0.34833  | -0.00027 |
| H | -7.82996 | 0.23849  | 0.00009  |

PEG\_4n\_wB97XD\_ox.log Energy: -433939.7929104

|   |          |          |          |
|---|----------|----------|----------|
| C | -5.84385 | -0.44984 | 0.38212  |
| H | -5.74144 | -0.53418 | 1.46680  |
| H | -5.80874 | -1.45271 | -0.05070 |
| C | -4.71379 | 0.38537  | -0.17491 |
| H | -4.72565 | 1.38603  | 0.26871  |
| H | -4.81393 | 0.48449  | -1.26047 |
| O | -7.05908 | 0.20396  | 0.04010  |
| O | -3.49882 | -0.27271 | 0.14313  |
| C | -2.37547 | 0.44221  | -0.31478 |
| H | -2.42511 | 0.60201  | -1.39575 |
| H | -2.29050 | 1.41106  | 0.18535  |
| C | -1.18019 | -0.41785 | 0.02084  |
| H | -1.15069 | -0.64584 | 1.10600  |
| H | -1.13452 | -1.38447 | -0.49127 |

|   |          |          |          |
|---|----------|----------|----------|
| O | 0.00013  | 0.29563  | -0.20368 |
| C | 1.19541  | -0.42162 | -0.32035 |
| H | 1.28108  | -0.59958 | -1.41166 |
| H | 1.11027  | -1.39486 | 0.16544  |
| C | 2.35062  | 0.44200  | 0.14532  |
| H | 2.31249  | 1.41725  | -0.34742 |
| H | 2.28345  | 0.58409  | 1.22785  |
| C | 4.68748  | 0.38285  | 0.27418  |
| H | 4.75387  | 1.39256  | -0.14320 |
| H | 4.65692  | 0.45810  | 1.36578  |
| C | 5.87425  | -0.44514 | -0.16274 |
| H | 5.89115  | -0.51976 | -1.25289 |
| H | 5.79532  | -1.45184 | 0.25484  |
| H | 7.80239  | -0.32243 | 0.06901  |
| O | 7.04278  | 0.20839  | 0.31561  |
| O | 3.51772  | -0.26337 | -0.20125 |
| H | -7.78501 | -0.31289 | 0.39414  |

PEG\_5n\_neutral\_wb97xd.logEnergy: -530637.2603209

|   |          |          |          |
|---|----------|----------|----------|
| C | 7.65740  | -0.50346 | -0.06525 |
| H | 7.64986  | -1.13379 | 0.82750  |
| H | 7.60093  | -1.14701 | -0.94678 |
| C | 6.47225  | 0.43480  | -0.03935 |
| H | 6.52292  | 1.08140  | 0.84348  |
| H | 6.47509  | 1.07035  | -0.93166 |
| C | 4.12674  | 0.44415  | 0.02691  |
| H | 4.12443  | 1.08189  | 0.91731  |
| H | 4.08386  | 1.08776  | -0.85822 |
| C | 2.93654  | -0.48795 | 0.04924  |
| H | 2.97370  | -1.12869 | 0.93667  |
| H | 2.94265  | -1.12838 | -0.83917 |
| O | 8.83110  | 0.29937  | -0.10369 |
| O | 5.29628  | -0.35022 | -0.00282 |
| O | 1.76806  | 0.30865  | 0.06931  |
| C | 0.58959  | -0.47315 | 0.07818  |
| H | 0.55563  | -1.11616 | -0.80773 |
| H | 0.56424  | -1.11065 | 0.96835  |
| C | -0.58959 | 0.47315  | 0.07816  |
| H | -0.56423 | 1.11070  | 0.96830  |
| H | -0.55564 | 1.11612  | -0.80778 |

|   |          |          |          |
|---|----------|----------|----------|
| O | -1.76806 | -0.30864 | 0.06935  |
| C | -2.93654 | 0.48795  | 0.04925  |
| H | -2.94266 | 1.12834  | -0.83920 |
| H | -2.97369 | 1.12874  | 0.93665  |
| C | -4.12674 | -0.44415 | 0.02697  |
| H | -4.08387 | -1.08780 | -0.85812 |
| H | -4.12442 | -1.08184 | 0.91740  |
| C | -6.47225 | -0.43480 | -0.03927 |
| H | -6.47510 | -1.07039 | -0.93155 |
| H | -6.52291 | -1.08137 | 0.84359  |
| C | -7.65740 | 0.50345  | -0.06520 |
| H | -7.60094 | 1.14697  | -0.94676 |
| H | -7.64986 | 1.13382  | 0.82752  |
| H | -9.59132 | 0.28470  | -0.11182 |
| O | -8.83110 | -0.29938 | -0.10360 |
| O | -5.29628 | 0.35022  | -0.00279 |
| H | 9.59132  | -0.28471 | -0.11188 |

PEG\_5n\_wB97XD\_ox.log Energy: -530484.6044960

|   |          |          |          |
|---|----------|----------|----------|
| C | 6.36813  | 1.82760  | -0.03891 |
| H | 5.79986  | 2.51882  | -0.66662 |
| H | 6.30506  | 2.16633  | 0.99800  |
| C | 5.78874  | 0.43644  | -0.15793 |
| H | 5.86269  | 0.08189  | -1.19137 |
| H | 6.33687  | -0.25848 | 0.48680  |
| C | 3.80056  | -0.75941 | 0.19553  |
| H | 3.84901  | -1.18165 | -0.81300 |
| H | 4.28163  | -1.45532 | 0.88992  |
| C | 2.36196  | -0.53389 | 0.59647  |
| H | 1.85046  | 0.11443  | -0.11672 |
| H | 2.28470  | -0.10636 | 1.59626  |
| O | 7.72375  | 1.76054  | -0.46429 |
| O | 4.43087  | 0.50225  | 0.23859  |
| O | 1.71890  | -1.81830 | 0.61224  |
| C | 0.40413  | -1.82718 | 0.80034  |
| H | 0.05643  | -2.79915 | 1.13276  |
| H | -0.00209 | -0.95416 | 1.30978  |
| C | -0.35913 | -1.71745 | -0.78306 |
| H | 0.05336  | -0.78407 | -1.16422 |
| H | -0.01626 | -2.63313 | -1.25163 |

|   |          |          |          |
|---|----------|----------|----------|
| O | -1.67490 | -1.72995 | -0.60207 |
| C | -2.31205 | -0.47679 | -0.31448 |
| H | -1.95101 | 0.27530  | -1.01532 |
| H | -2.05257 | -0.18433 | 0.70507  |
| C | -3.80196 | -0.69813 | -0.43883 |
| H | -4.06285 | -0.96116 | -1.46850 |
| H | -4.11505 | -1.51328 | 0.22110  |
| C | -5.83221 | 0.43922  | -0.13919 |
| H | -6.14337 | 0.22962  | -1.16795 |
| H | -6.20341 | -0.36435 | 0.50551  |
| C | -6.38595 | 1.77074  | 0.31421  |
| H | -6.00615 | 2.56741  | -0.33022 |
| H | -6.06950 | 1.97176  | 1.34078  |
| H | -8.16664 | 2.53611  | 0.50077  |
| O | -7.80361 | 1.69024  | 0.23176  |
| O | -4.42023 | 0.51274  | -0.06165 |
| H | 8.11722  | 2.62661  | -0.34280 |

PEG\_6n\_neutral\_wb97xd.logEnergy: -627171.1189001

|   |          |          |          |
|---|----------|----------|----------|
| C | 9.42659  | 0.45062  | -0.14353 |
| H | 9.43823  | 1.10641  | 0.73062  |
| H | 9.36782  | 1.06913  | -1.04266 |
| C | 8.22977  | -0.47060 | -0.07607 |
| H | 8.28388  | -1.09273 | 0.82398  |
| H | 8.21264  | -1.13098 | -0.94999 |
| C | 5.88584  | -0.44800 | 0.02139  |
| H | 5.88886  | -1.06159 | 0.92860  |
| H | 5.82230  | -1.11459 | -0.84528 |
| C | 4.70699  | 0.49860  | 0.03593  |
| H | 4.76508  | 1.16277  | 0.90479  |
| H | 4.70641  | 1.11445  | -0.86972 |
| C | 2.36015  | 0.51010  | 0.10389  |
| H | 2.35452  | 1.16839  | 0.97913  |
| H | 2.31885  | 1.13240  | -0.79636 |
| C | 1.17292  | -0.42525 | 0.14342  |
| H | 1.20575  | -1.04135 | 1.04829  |
| H | 1.18970  | -1.08977 | -0.72698 |
| O | 10.58903 | -0.36893 | -0.17251 |
| O | 7.06447  | 0.33044  | -0.04649 |
| O | 3.53042  | -0.28392 | 0.09572  |

|   |           |          |          |
|---|-----------|----------|----------|
| O | -0.00001  | 0.36489  | 0.13150  |
| C | -1.17295  | -0.42524 | 0.14320  |
| H | -1.18958  | -1.08976 | -0.72720 |
| H | -1.20594  | -1.04134 | 1.04807  |
| C | -2.36016  | 0.51012  | 0.10347  |
| H | -2.35468  | 1.16841  | 0.97871  |
| H | -2.31871  | 1.13241  | -0.79678 |
| O | -3.53044  | -0.28389 | 0.09510  |
| C | -4.70699  | 0.49863  | 0.03516  |
| H | -4.70627  | 1.11451  | -0.87047 |
| H | -4.76522  | 1.16277  | 0.90403  |
| C | -5.88585  | -0.44797 | 0.02041  |
| H | -5.82220  | -1.11449 | -0.84630 |
| H | -5.88897  | -1.06162 | 0.92758  |
| C | -8.22974  | -0.47060 | -0.07741 |
| H | -8.21253  | -1.13077 | -0.95148 |
| H | -8.28390  | -1.09293 | 0.82249  |
| C | -9.42659  | 0.45061  | -0.14474 |
| H | -9.36773  | 1.06940  | -1.04368 |
| H | -9.43836  | 1.10614  | 0.72960  |
| H | -11.35716 | 0.20398  | -0.20217 |
| O | -10.58899 | -0.36898 | -0.17412 |
| O | -7.06446  | 0.33047  | -0.04755 |
| H | 11.35718  | 0.20406  | -0.20074 |

PEG\_6n\_wB97XD\_ox.log Energy: -627007.5357018

|   |          |          |          |
|---|----------|----------|----------|
| C | -9.38828 | -0.14412 | 0.55902  |
| H | -9.27728 | 0.01732  | 1.63426  |
| H | -9.44249 | -1.21933 | 0.37145  |
| C | -8.20236 | 0.44404  | -0.17113 |
| H | -8.14925 | 1.52394  | 0.00466  |
| H | -8.30124 | 0.27476  | -1.24881 |
| C | -5.86628 | 0.29067  | -0.31859 |
| H | -5.76759 | 1.37099  | -0.16904 |
| H | -5.91164 | 0.09318  | -1.39476 |
| C | -4.68523 | -0.42732 | 0.29380  |
| H | -4.63328 | -0.22640 | 1.36826  |
| H | -4.77563 | -1.50748 | 0.14362  |
| C | -2.35007 | -0.54182 | 0.16042  |
| H | -2.27306 | -0.39640 | 1.24182  |



|   |           |          |          |
|---|-----------|----------|----------|
| H | -2.31949  | -1.61176 | -0.06188 |
| C | -1.19799  | 0.16745  | -0.52348 |
| H | -1.11540  | 1.23494  | -0.31514 |
| H | -1.28801  | 0.04363  | -1.62184 |
| O | -10.55265 | 0.51090  | 0.07009  |
| O | -7.03446  | -0.18764 | 0.31736  |
| O | -3.51723  | 0.05722  | -0.34840 |
| O | 0.00083   | -0.48845 | -0.22419 |
| C | 1.17531   | 0.26851  | -0.18315 |
| H | 1.12281   | 1.07999  | -0.91669 |
| H | 1.14419   | 0.75209  | 0.81438  |
| C | 2.37876   | -0.63643 | -0.30398 |
| H | 2.30963   | -1.45054 | 0.42301  |
| H | 2.42329   | -1.06021 | -1.31138 |
| O | 3.49602   | 0.18202  | -0.04979 |
| C | 4.71548   | -0.52972 | -0.17801 |
| H | 4.81429   | -0.92585 | -1.19337 |
| H | 4.73726   | -1.36644 | 0.52712  |
| C | 5.83702   | 0.43889  | 0.12048  |
| H | 5.81011   | 1.27544  | -0.58577 |
| H | 5.72942   | 0.83886  | 1.13422  |
| C | 8.17619   | 0.55878  | 0.25198  |
| H | 8.19901   | 1.39322  | -0.45738 |
| H | 8.12117   | 0.97006  | 1.26574  |
| C | 9.41992   | -0.28692 | 0.09943  |
| H | 9.46226   | -0.70236 | -0.91051 |
| H | 9.39710   | -1.11234 | 0.81535  |
| H | 11.33549  | 0.03567  | 0.24373  |
| O | 10.53790  | 0.55874  | 0.34192  |
| O | 7.05566   | -0.26672 | -0.00136 |
| H | -11.31518 | 0.13456  | 0.51310  |

PEG\_7n\_wB97XD\_ox.log Energy: -723552.4716793

|   |          |         |          |
|---|----------|---------|----------|
| C | 10.14229 | 1.74870 | -0.20682 |
| H | 10.58738 | 0.77754 | 0.02372  |
| H | 10.09530 | 1.86128 | -1.29293 |
| C | 8.74885  | 1.82283 | 0.37505  |
| H | 8.78767  | 1.70856 | 1.46379  |
| H | 8.29515  | 2.79333 | 0.14641  |
| C | 6.65491  | 0.76318 | 0.27657  |

|   |           |          |          |
|---|-----------|----------|----------|
| H | 6.64135   | 0.62735  | 1.36310  |
| H | 6.15558   | 1.70877  | 0.03996  |
| C | 5.94475   | -0.38466 | -0.40415 |
| H | 6.42949   | -1.33338 | -0.15204 |
| H | 5.97814   | -0.25627 | -1.49085 |
| C | 3.85656   | -1.43295 | -0.54594 |
| H | 4.24986   | -2.40794 | -0.24192 |
| H | 3.89587   | -1.36446 | -1.63739 |
| C | 2.42861   | -1.27685 | -0.07256 |
| H | 2.36357   | -1.35440 | 1.01457  |
| H | 1.99488   | -0.33446 | -0.40461 |
| C | 0.38533   | -2.20413 | -0.82787 |
| H | 0.06850   | -1.18380 | -1.04429 |
| H | -0.02212  | -2.99192 | -1.45172 |
| C | -0.44150  | -2.49893 | 0.70325  |
| H | -0.09427  | -1.65985 | 1.30560  |
| H | -0.06737  | -3.48281 | 0.96464  |
| O | 10.90295  | 2.80050  | 0.37485  |
| O | 7.98610   | 0.77940  | -0.19933 |
| O | 4.60100   | -0.38913 | 0.04310  |
| O | 1.68620   | -2.37123 | -0.63023 |
| O | -1.74544  | -2.52893 | 0.45513  |
| C | -2.43568  | -1.27291 | 0.39651  |
| H | -2.14293  | -0.66466 | 1.25195  |
| H | -2.15176  | -0.76821 | -0.52956 |
| C | -3.91558  | -1.57970 | 0.39866  |
| H | -4.16009  | -2.24453 | -0.43564 |
| H | -4.20134  | -2.07119 | 1.33372  |
| O | -4.58247  | -0.34376 | 0.26111  |
| C | -5.98950  | -0.49870 | 0.22566  |
| H | -6.34259  | -0.95752 | 1.15481  |
| H | -6.27585  | -1.14405 | -0.61104 |
| C | -6.59541  | 0.87597  | 0.05576  |
| H | -6.31522  | 1.51863  | 0.89705  |
| H | -6.23007  | 1.33730  | -0.86792 |
| C | -8.66756  | 1.96123  | -0.13576 |
| H | -8.43768  | 2.61238  | 0.71461  |
| H | -8.34270  | 2.46491  | -1.05271 |
| C | -10.15245 | 1.68300  | -0.19198 |
| H | -10.46670 | 1.17182  | 0.72141  |

|   |           |         |          |
|---|-----------|---------|----------|
| H | -10.37627 | 1.03904 | -1.04620 |
| H | -11.75955 | 2.77252 | -0.34404 |
| O | -10.81486 | 2.93544 | -0.31989 |
| O | -7.99986  | 0.72196 | 0.00380  |
| H | 11.79301  | 2.75554 | 0.02084  |

PEG\_8n\_neutral\_wb97xd.logEnergy: -820238.8198762

|   |           |          |          |
|---|-----------|----------|----------|
| C | -12.95636 | 0.36872  | -0.28713 |
| H | -12.89596 | 0.93471  | -1.22011 |
| H | -12.98335 | 1.07376  | 0.54743  |
| C | -11.75029 | -0.53332 | -0.15572 |
| H | -11.80723 | -1.10399 | 0.77762  |
| H | -11.71678 | -1.24183 | -0.99059 |
| C | -9.40795  | -0.47884 | -0.03818 |
| H | -9.32633  | -1.18869 | -0.86820 |
| H | -9.41549  | -1.04463 | 0.89955  |
| C | -8.23955  | 0.48058  | -0.05780 |
| H | -8.23159  | 1.04739  | -0.99487 |
| H | -8.31794  | 1.18929  | 0.77346  |
| C | -5.89448  | 0.52219  | 0.05382  |
| H | -5.83731  | 1.09532  | -0.87765 |
| H | -5.91681  | 1.22665  | 0.89204  |
| C | -4.69974  | -0.39657 | 0.17394  |
| H | -4.68464  | -1.10451 | -0.66156 |
| H | -4.75353  | -0.96623 | 1.10776  |
| C | -2.35595  | -0.37233 | 0.24962  |
| H | -2.30699  | -1.08603 | -0.57964 |
| H | -2.34646  | -0.93462 | 1.18938  |
| C | -1.17447  | 0.56934  | 0.19157  |
| H | -1.19242  | 1.13826  | -0.74405 |
| H | -1.21056  | 1.27689  | 1.02673  |
| C | 1.17446   | 0.56936  | 0.19153  |
| H | 1.19239   | 1.13825  | -0.74411 |
| H | 1.21055   | 1.27694  | 1.02667  |
| C | 2.35596   | -0.37228 | 0.24961  |
| H | 2.30699   | -1.08604 | -0.57961 |
| H | 2.34650   | -0.93452 | 1.18941  |
| O | -10.59412 | 0.28135  | -0.16009 |
| O | -7.05605  | -0.28448 | 0.06126  |
| O | -3.53420  | 0.40434  | 0.15584  |

|   |           |          |          |
|---|-----------|----------|----------|
| O | 0.00000   | -0.21526 | 0.26417  |
| O | 3.53419   | 0.40439  | 0.15575  |
| C | 4.69974   | -0.39651 | 0.17392  |
| H | 4.75355   | -0.96608 | 1.10779  |
| H | 4.68464   | -1.10452 | -0.66152 |
| C | 5.89447   | 0.52225  | 0.05371  |
| H | 5.83730   | 1.09530  | -0.87781 |
| H | 5.91680   | 1.22680  | 0.89187  |
| O | 7.05605   | -0.28441 | 0.06123  |
| C | 8.23955   | 0.48065  | -0.05787 |
| H | 8.31794   | 1.18940  | 0.77335  |
| H | 8.23160   | 1.04740  | -0.99497 |
| C | 9.40794   | -0.47879 | -0.03820 |
| H | 9.41546   | -1.04455 | 0.89955  |
| H | 9.32633   | -1.18867 | -0.86820 |
| C | 11.75027  | -0.53333 | -0.15570 |
| H | 11.80717  | -1.10400 | 0.77764  |
| H | 11.71677  | -1.24184 | -0.99057 |
| C | 12.95639  | 0.36866  | -0.28708 |
| H | 12.98339  | 1.07369  | 0.54749  |
| H | 12.89603  | 0.93467  | -1.22004 |
| H | 14.88393  | 0.09658  | -0.34289 |
| O | 14.10936  | -0.46471 | -0.27827 |
| O | 10.59413  | 0.28137  | -0.16011 |
| O | -14.10937 | -0.46460 | -0.27834 |
| H | -14.88391 | 0.09673  | -0.34308 |

PEG\_8n\_wB97XD\_ox.log Energy: -820075.2817407

|   |          |          |          |
|---|----------|----------|----------|
| C | 11.50151 | -2.80376 | 0.02646  |
| H | 11.21261 | -3.37284 | -0.86071 |
| H | 11.19430 | -3.36229 | 0.91418  |
| C | 10.82209 | -1.45334 | 0.01168  |
| H | 11.10738 | -0.87799 | 0.89913  |
| H | 11.12448 | -0.88831 | -0.87675 |
| C | 8.69651  | -0.45882 | -0.01042 |
| H | 8.95227  | 0.12927  | -0.89822 |
| H | 8.93753  | 0.13477  | 0.87785  |
| C | 7.22506  | -0.80615 | -0.02113 |
| H | 6.98229  | -1.39672 | -0.91082 |
| H | 6.96995  | -1.39631 | 0.86538  |

|   |           |          |          |
|---|-----------|----------|----------|
| C | 5.10028   | 0.18825  | -0.03432 |
| H | 4.80936   | -0.37567 | -0.92680 |
| H | 4.80080   | -0.38446 | 0.84968  |
| C | 4.42732   | 1.54176  | -0.03002 |
| H | 4.72108   | 2.11606  | -0.91414 |
| H | 4.71381   | 2.10550  | 0.86323  |
| C | 2.30489   | 2.53128  | -0.01785 |
| H | 2.53178   | 3.13846  | -0.89879 |
| H | 2.53314   | 3.11060  | 0.88138  |
| C | 0.84876   | 2.13846  | -0.02130 |
| H | 0.55699   | 1.56434  | -0.91582 |
| H | 0.57019   | 1.50930  | 0.83948  |
| C | -1.33228  | 3.20657  | 0.03054  |
| H | -1.63093  | 3.81056  | 0.90588  |
| H | -1.64471  | 3.84080  | -0.81888 |
| C | -1.95030  | 1.83612  | 0.01011  |
| H | -1.63279  | 1.25694  | 0.88576  |
| H | -1.64695  | 1.28807  | -0.89007 |
| O | 9.42442   | -1.67107 | -0.00042 |
| O | 6.49709   | 0.40673  | -0.02629 |
| O | 3.02694   | 1.32180  | -0.03683 |
| O | 0.05682   | 3.29212  | 0.02023  |
| O | -3.34101  | 2.04284  | 0.02482  |
| C | -4.05411  | 0.81608  | 0.00948  |
| H | -3.80035  | 0.24736  | -0.89014 |
| H | -3.78958  | 0.21903  | 0.88737  |
| C | -5.52924  | 1.14533  | 0.02359  |
| H | -5.78080  | 1.71740  | 0.92276  |
| H | -5.79127  | 1.74593  | -0.85372 |
| O | -6.23409  | -0.07982 | 0.00799  |
| C | -7.63613  | 0.10885  | 0.02013  |
| H | -7.94772  | 0.68681  | -0.85623 |
| H | -7.93661  | 0.65585  | 0.91995  |
| C | -8.27960  | -1.25915 | 0.00001  |
| H | -7.97724  | -1.80415 | -0.90055 |
| H | -7.96380  | -1.83704 | 0.87510  |
| C | -10.37501 | -2.31170 | -0.01504 |
| H | -10.11562 | -2.86954 | -0.92146 |
| H | -10.10032 | -2.92005 | 0.85355  |
| C | -11.85738 | -2.01548 | 0.00577  |

|   |           |          |          |
|---|-----------|----------|----------|
| H | -12.12456 | -1.40269 | -0.85884 |
| H | -12.11305 | -1.46605 | 0.91518  |
| H | -13.47975 | -3.09498 | -0.01019 |
| O | -12.53645 | -3.26506 | -0.03468 |
| O | -9.68214  | -1.07892 | 0.01395  |
| O | 12.90539  | -2.57246 | 0.03968  |
| H | 13.34826  | -3.42294 | 0.05266  |

PEG\_1n\_wB97XD\_reduced.log Energy: -144494.0589769

|   |          |          |          |
|---|----------|----------|----------|
| C | -0.58007 | -0.48655 | 0.00342  |
| H | -0.52413 | -1.12614 | 0.89008  |
| H | -0.52922 | -1.13256 | -0.87879 |
| C | 0.58007  | 0.48655  | -0.00342 |
| H | 0.52922  | 1.13256  | 0.87879  |
| H | 0.52413  | 1.12614  | -0.89008 |
| O | -1.78863 | 0.26559  | 0.00361  |
| O | 1.78863  | -0.26559 | -0.00361 |
| H | -2.52031 | -0.36398 | -0.02580 |
| H | 2.52031  | 0.36398  | 0.02580  |

PEG\_1n\_wB97XD\_reduced\_a.log Energy: -144075.6985476

|   |          |          |          |
|---|----------|----------|----------|
| C | -0.52556 | -0.51157 | -0.00012 |
| H | -0.48363 | -1.14699 | 0.88781  |
| H | -0.48398 | -1.14668 | -0.88831 |
| C | 0.65714  | 0.43606  | -0.00022 |
| H | 0.63119  | 1.12147  | 0.86579  |
| H | 0.63075  | 1.12309  | -0.86479 |
| O | -1.70396 | 0.28345  | 0.00013  |
| O | 1.87622  | -0.18271 | 0.00006  |
| H | -2.46193 | -0.30379 | 0.00005  |

PEG\_1n\_wB97XD\_reduced\_b.log Energy: -144086.6352068

|   |          |          |          |
|---|----------|----------|----------|
| C | -0.66095 | 0.52295  | -0.30186 |
| H | -0.60808 | 0.40704  | -1.38805 |
| H | -1.13299 | 1.48015  | -0.07341 |
| C | 0.68937  | 0.50594  | 0.27376  |
| H | 0.92501  | 0.93173  | 1.23975  |
| O | -1.46094 | -0.55257 | 0.24679  |
| O | 1.53821  | -0.45101 | -0.21359 |
| H | -2.32322 | -0.51363 | -0.17461 |

|   |         |          |         |
|---|---------|----------|---------|
| H | 2.35066 | -0.44998 | 0.29936 |
|---|---------|----------|---------|

PEG\_2n\_wB97XD\_reduced.log      Energy: -241043.7204270

|   |          |          |          |
|---|----------|----------|----------|
| C | 2.36399  | 0.51170  | 0.00009  |
| H | 2.33207  | 1.14863  | 0.88760  |
| H | 2.33188  | 1.14887  | -0.88724 |
| C | 1.17851  | -0.42658 | 0.00006  |
| H | 1.20736  | -1.06846 | 0.88763  |
| H | 1.20746  | -1.06848 | -0.88750 |
| O | 3.53961  | -0.29010 | -0.00014 |
| O | 0.00259  | 0.35738  | -0.00002 |
| C | -1.17297 | -0.43921 | 0.00005  |
| H | -1.18451 | -1.08216 | -0.88697 |
| H | -1.18453 | -1.08200 | 0.88719  |
| C | -2.36351 | 0.48875  | -0.00004 |
| H | -2.32476 | 1.13714  | 0.88271  |
| H | -2.32472 | 1.13700  | -0.88290 |
| O | -3.55071 | -0.28790 | -0.00001 |
| H | 4.29914  | 0.29488  | -0.00002 |
| H | -4.32739 | 0.39149  | -0.00015 |

PEG\_3n\_wB97XD\_reduced.log      Energy: -337560.0588884

|   |          |          |          |
|---|----------|----------|----------|
| C | 4.12752  | -0.51468 | -0.00017 |
| H | 4.09548  | -1.15168 | -0.88763 |
| H | 4.09533  | -1.15217 | 0.88694  |
| C | 2.94228  | 0.42445  | -0.00001 |
| H | 2.96827  | 1.06638  | -0.88854 |
| H | 2.96821  | 1.06599  | 0.88881  |
| O | 5.30292  | 0.28872  | 0.00015  |
| O | 1.76291  | -0.35742 | -0.00021 |
| C | 0.60441  | 0.45633  | -0.00019 |
| H | 0.58857  | 1.09788  | 0.89306  |
| H | 0.58853  | 1.09788  | -0.89343 |
| C | -0.60441 | -0.45633 | -0.00015 |
| H | -0.58858 | -1.09789 | -0.89338 |
| H | -0.58852 | -1.09786 | 0.89311  |
| O | -1.76291 | 0.35742  | -0.00013 |
| C | -2.94228 | -0.42445 | 0.00019  |
| H | -2.96816 | -1.06594 | 0.88904  |
| H | -2.96832 | -1.06644 | -0.88830 |

|   |          |          |          |
|---|----------|----------|----------|
| C | -4.12752 | 0.51468  | 0.00003  |
| H | -4.09528 | 1.15223  | 0.88709  |
| H | -4.09553 | 1.15162  | -0.88748 |
| O | -5.30292 | -0.28872 | 0.00047  |
| H | 6.06243  | -0.29625 | -0.00002 |
| H | -6.06243 | 0.29625  | 0.00026  |

PEG\_4n\_wB97XD\_reduced.log      Energy: -434099.2112053

|   |          |          |          |
|---|----------|----------|----------|
| C | -5.88162 | 0.50002  | -0.10613 |
| H | -5.79635 | 1.14000  | -0.98781 |
| H | -5.89921 | 1.13381  | 0.78409  |
| C | -4.69980 | -0.44051 | -0.04096 |
| H | -4.67124 | -1.07184 | -0.93568 |
| H | -4.78477 | -1.09136 | 0.83640  |
| O | -7.05718 | -0.29861 | -0.17722 |
| O | -3.52565 | 0.34232  | 0.04273  |
| C | -2.35697 | -0.45604 | 0.08817  |
| H | -2.37295 | -1.10486 | 0.97001  |
| H | -2.29072 | -1.08607 | -0.80991 |
| C | -1.17040 | 0.47576  | 0.11985  |
| H | -1.13422 | 1.04745  | -0.82276 |
| H | -1.24181 | 1.17222  | 0.96309  |
| O | -0.00000 | -0.31334 | 0.23450  |
| C | 1.17040  | 0.47576  | 0.11985  |
| H | 1.24181  | 1.17223  | 0.96308  |
| H | 1.13421  | 1.04744  | -0.82276 |
| C | 2.35697  | -0.45604 | 0.08818  |
| H | 2.37296  | -1.10483 | 0.97004  |
| H | 2.29072  | -1.08611 | -0.80987 |
| C | 4.69980  | -0.44051 | -0.04095 |
| H | 4.78477  | -1.09131 | 0.83646  |
| H | 4.67124  | -1.07189 | -0.93563 |
| C | 5.88162  | 0.50002  | -0.10616 |
| H | 5.89919  | 1.13387  | 0.78402  |
| H | 5.79635  | 1.13994  | -0.98788 |
| H | 7.81340  | 0.28884  | -0.22520 |
| O | 7.05718  | -0.29860 | -0.17719 |
| O | 3.52564  | 0.34232  | 0.04271  |
| H | -7.81340 | 0.28884  | -0.22512 |



PEG\_5n\_wB97XD\_reduced.log      Energy: -530633.1269462

|   |          |          |          |
|---|----------|----------|----------|
| C | 7.64297  | 0.50562  | -0.16853 |
| H | 7.55415  | 1.12063  | -1.06750 |
| H | 7.66047  | 1.16383  | 0.70374  |
| C | 6.46402  | -0.43617 | -0.07468 |
| H | 6.43932  | -1.09758 | -0.94754 |
| H | 6.54783  | -1.05641 | 0.82449  |
| C | 4.12112  | -0.45001 | 0.06780  |
| H | 4.05263  | -1.11919 | -0.79684 |
| H | 4.14819  | -1.06143 | 0.97611  |
| C | 2.92957  | 0.47951  | 0.09564  |
| H | 2.89031  | 1.06723  | -0.82863 |
| H | 3.00517  | 1.16910  | 0.94374  |
| O | 8.82020  | -0.29164 | -0.21979 |
| O | 5.28730  | 0.34614  | -0.02065 |
| O | 1.76549  | -0.31513 | 0.21340  |
| C | 0.58877  | 0.47006  | 0.15769  |
| H | 0.54988  | 1.16522  | 1.00278  |
| H | 0.56379  | 1.04093  | -0.79145 |
| C | -0.58878 | -0.46946 | 0.15790  |
| H | -0.56444 | -1.04001 | -0.79152 |
| H | -0.54935 | -1.16482 | 1.00281  |
| O | -1.76557 | 0.31555  | 0.21445  |
| C | -2.92954 | -0.47923 | 0.09627  |
| H | -3.00533 | -1.16883 | 0.94436  |
| H | -2.88980 | -1.06689 | -0.82805 |
| C | -4.12117 | 0.45013  | 0.06790  |
| H | -4.14847 | 1.06199  | 0.97591  |
| H | -4.05260 | 1.11889  | -0.79707 |
| C | -6.46406 | 0.43593  | -0.07490 |
| H | -6.54808 | 1.05656  | 0.82398  |
| H | -6.43932 | 1.09697  | -0.94805 |
| C | -7.64287 | -0.50604 | -0.16850 |
| H | -7.66036 | -1.16392 | 0.70402  |
| H | -7.55388 | -1.12140 | -1.06722 |
| H | -9.57533 | -0.29713 | -0.27647 |
| O | -8.82022 | 0.29102  | -0.22020 |
| O | -5.28725 | -0.34621 | -0.02035 |
| H | 9.57542  | 0.29638  | -0.27593 |

PEG\_6n\_wB97XD\_reduced.log      Energy: -627165.8970330

|   |           |          |          |
|---|-----------|----------|----------|
| C | -9.43891  | 0.42004  | 0.10926  |
| H | -9.44675  | 1.08076  | -0.76116 |
| H | -9.39480  | 1.03370  | 1.01246  |
| C | -8.23385  | -0.49095 | 0.04930  |
| H | -8.27380  | -1.10887 | -0.85443 |
| H | -8.22044  | -1.15581 | 0.91991  |
| C | -5.88908  | -0.44886 | -0.02236 |
| H | -5.87827  | -1.05947 | -0.93157 |
| H | -5.82958  | -1.11804 | 0.84265  |
| C | -4.71681  | 0.50609  | -0.02174 |
| H | -4.77134  | 1.17325  | -0.88851 |
| H | -4.73078  | 1.12014  | 0.88499  |
| C | -2.36955  | 0.54472  | -0.06932 |
| H | -2.35616  | 1.21306  | -0.93858 |
| H | -2.33424  | 1.17600  | 0.82671  |
| C | -1.17866  | -0.39218 | -0.10161 |
| H | -1.21511  | -1.01446 | -1.00240 |
| H | -1.19992  | -1.05250 | 0.77216  |
| O | -10.59492 | -0.40924 | 0.12113  |
| O | -7.07506  | 0.31964  | 0.03592  |
| O | -3.53384  | -0.26686 | -0.07157 |
| O | 0.00000   | 0.39340  | -0.09411 |
| C | 1.17866   | -0.39218 | -0.10160 |
| H | 1.19992   | -1.05250 | 0.77216  |
| H | 1.21511   | -1.01446 | -1.00240 |
| C | 2.36955   | 0.54472  | -0.06931 |
| H | 2.35616   | 1.21306  | -0.93857 |
| H | 2.33424   | 1.17600  | 0.82671  |
| O | 3.53384   | -0.26686 | -0.07156 |
| C | 4.71681   | 0.50609  | -0.02173 |
| H | 4.73078   | 1.12013  | 0.88500  |
| H | 4.77134   | 1.17326  | -0.88850 |
| C | 5.88908   | -0.44886 | -0.02236 |
| H | 5.82958   | -1.11805 | 0.84265  |
| H | 5.87827   | -1.05947 | -0.93157 |
| C | 8.23385   | -0.49095 | 0.04930  |
| H | 8.22045   | -1.15581 | 0.91991  |
| H | 8.27379   | -1.10887 | -0.85443 |
| C | 9.43891   | 0.42004  | 0.10925  |

|   |           |          |          |
|---|-----------|----------|----------|
| H | 9.39480   | 1.03370  | 1.01246  |
| H | 9.44675   | 1.08076  | -0.76117 |
| H | 11.36799  | 0.15710  | 0.14899  |
| O | 10.59492  | -0.40924 | 0.12113  |
| O | 7.07506   | 0.31964  | 0.03592  |
| H | -11.36799 | 0.15710  | 0.14900  |

PEG\_7n\_wb97xd\_reduced.log Energy: -723713.0702154

|   |          |          |          |
|---|----------|----------|----------|
| C | 11.17043 | -0.53096 | -0.24729 |
| H | 11.17825 | -1.16498 | 0.64670  |
| H | 11.05154 | -1.19079 | -1.11425 |
| C | 10.00475 | 0.42544  | -0.17918 |
| H | 10.09035 | 1.08010  | 0.69499  |
| H | 9.96824  | 1.05496  | -1.07502 |
| C | 7.65682  | 0.45743  | -0.02900 |
| H | 7.69169  | 1.11476  | 0.84655  |
| H | 7.58300  | 1.08257  | -0.92548 |
| C | 6.46370  | -0.46690 | 0.05921  |
| H | 6.53045  | -1.08543 | 0.96052  |
| H | 6.43645  | -1.12966 | -0.81225 |
| C | 4.12084  | -0.44928 | 0.17363  |
| H | 4.12568  | -1.05765 | 1.08430  |
| H | 4.05907  | -1.12091 | -0.68921 |
| C | 2.93985  | 0.49470  | 0.18084  |
| H | 2.99186  | 1.16158  | 1.04800  |
| H | 2.94327  | 1.10781  | -0.72662 |
| C | 0.59274  | 0.50298  | 0.21897  |
| H | 0.57247  | 1.16891  | 1.08818  |
| H | 0.56497  | 1.11740  | -0.68719 |
| C | -0.59423 | -0.43312 | 0.24649  |
| H | -0.58014 | -1.03792 | 1.15940  |
| H | -0.55881 | -1.10826 | -0.61509 |
| O | 12.37452 | 0.21293  | -0.34439 |
| O | 8.81688  | -0.34734 | -0.08633 |
| O | 5.29716  | 0.33225  | 0.10058  |
| O | 1.76404  | -0.28942 | 0.23586  |
| O | -1.76697 | 0.35610  | 0.19983  |
| C | -2.93973 | -0.43428 | 0.18942  |
| H | -2.93575 | -1.10505 | -0.67632 |
| H | -2.99424 | -1.04374 | 1.09771  |

|   |           |          |          |
|---|-----------|----------|----------|
| C | -4.12528  | 0.50111  | 0.11533  |
| H | -4.13803  | 1.16706  | 0.98467  |
| H | -4.06391  | 1.11543  | -0.78923 |
| O | -5.29601  | -0.29185 | 0.08879  |
| C | -6.46987  | 0.49218  | 0.00174  |
| H | -6.45212  | 1.10063  | -0.90871 |
| H | -6.54189  | 1.16355  | 0.86398  |
| C | -7.65049  | -0.45196 | -0.02538 |
| H | -7.57480  | -1.12502 | -0.88601 |
| H | -7.66962  | -1.05882 | 0.88613  |
| C | -9.99304  | -0.46877 | -0.15601 |
| H | -9.96489  | -1.13906 | -1.02204 |
| H | -10.06280 | -1.08036 | 0.75013  |
| C | -11.18541 | 0.45568  | -0.25207 |
| H | -11.11097 | 1.06330  | -1.15744 |
| H | -11.20748 | 1.12178  | 0.61402  |
| H | -13.11593 | 0.21566  | -0.33347 |
| O | -12.35046 | -0.35987 | -0.28869 |
| O | -8.82578  | 0.32904  | -0.11777 |
| H | 13.13043  | -0.48790 | -0.39017 |

PEG\_8n\_wb97xd\_reduced.log      Energy: -820246.9225044

|   |           |          |          |
|---|-----------|----------|----------|
| C | -12.93400 | 0.48694  | -0.34346 |
| H | -12.81184 | 1.12713  | -1.22461 |
| H | -12.95338 | 1.14161  | 0.53536  |
| C | -11.76296 | -0.46007 | -0.24369 |
| H | -11.85052 | -1.09310 | 0.64608  |
| H | -11.71632 | -1.11165 | -1.12313 |
| C | -9.41610  | -0.47297 | -0.07426 |
| H | -9.33225  | -1.12309 | -0.95186 |
| H | -9.45297  | -1.10515 | 0.81956  |
| C | -8.22949  | 0.46124  | -0.00413 |
| H | -8.19726  | 1.09592  | -0.89608 |
| H | -8.30922  | 1.10792  | 0.87610  |
| C | -5.88794  | 0.46231  | 0.13443  |
| H | -5.81669  | 1.09946  | -0.75347 |
| H | -5.91010  | 1.10632  | 1.02000  |
| C | -4.70222  | -0.47355 | 0.19803  |
| H | -4.68735  | -1.12254 | -0.68403 |
| H | -4.76523  | -1.10543 | 1.09029  |

|   |           |          |          |
|---|-----------|----------|----------|
| C | -2.35685  | -0.46774 | 0.28368  |
| H | -2.30914  | -1.12352 | -0.59214 |
| H | -2.35097  | -1.09247 | 1.18316  |
| C | -1.17382  | 0.47374  | 0.29051  |
| H | -1.19350  | 1.10691  | -0.60286 |
| H | -1.20835  | 1.12128  | 1.17306  |
| C | 1.17304   | 0.47962  | 0.28002  |
| H | 1.18271   | 1.11133  | -0.61457 |
| H | 1.21120   | 1.12885  | 1.16118  |
| C | 2.36038   | -0.45632 | 0.26615  |
| H | 2.31022   | -1.11302 | -0.60884 |
| H | 2.36279   | -1.08036 | 1.16613  |
| O | -10.58069 | 0.32244  | -0.16235 |
| O | -7.05865  | -0.32872 | 0.07495  |
| O | -3.53143  | 0.31879  | 0.24100  |
| O | 0.00169   | -0.31255 | 0.30554  |
| O | 3.53147   | 0.33509  | 0.21578  |
| C | 4.70495   | -0.45298 | 0.17010  |
| H | 4.77272   | -1.08390 | 1.06270  |
| H | 4.69003   | -1.10282 | -0.71134 |
| C | 5.88765   | 0.48653  | 0.10308  |
| H | 5.81448   | 1.12124  | -0.78639 |
| H | 5.90876   | 1.13255  | 0.98718  |
| O | 7.06010   | -0.30224 | 0.04514  |
| C | 8.23056   | 0.48786  | -0.03215 |
| H | 8.30789   | 1.13702  | 0.84648  |
| H | 8.20256   | 1.11958  | -0.92636 |
| C | 9.41459   | -0.45035 | -0.09382 |
| H | 9.44348   | -1.08109 | 0.80108  |
| H | 9.33514   | -1.10060 | -0.97149 |
| C | 11.75675  | -0.45188 | -0.23877 |
| H | 11.83540  | -1.08453 | 0.65206  |
| H | 11.72700  | -1.10144 | -1.12040 |
| C | 12.94297  | 0.48189  | -0.31976 |
| H | 12.96509  | 1.12832  | 0.56115  |
| H | 12.85994  | 1.10952  | -1.21060 |
| H | 14.87407  | 0.25725  | -0.42332 |
| O | 14.11324  | -0.32463 | -0.38077 |
| O | 10.58553  | 0.33840  | -0.17437 |
| O | -14.13254 | -0.26672 | -0.43290 |

H -14.89313 0.42791 -0.49193

PEG\_4n\_wB97XD\_ox.log Energy: -433939.7929104

|   |          |          |          |
|---|----------|----------|----------|
| C | -5.84385 | 0.44984  | -0.38212 |
| H | -5.74144 | 0.53418  | -1.46680 |
| H | -5.80874 | 1.45271  | 0.05070  |
| C | -4.71379 | -0.38537 | 0.17491  |
| H | -4.72565 | -1.38603 | -0.26871 |
| H | -4.81393 | -0.48449 | 1.26047  |
| O | -7.05908 | -0.20396 | -0.04010 |
| O | -3.49882 | 0.27271  | -0.14313 |
| C | -2.37547 | -0.44221 | 0.31478  |
| H | -2.42511 | -0.60201 | 1.39575  |
| H | -2.29050 | -1.41106 | -0.18535 |
| C | -1.18019 | 0.41785  | -0.02084 |
| H | -1.15069 | 0.64584  | -1.10600 |
| H | -1.13452 | 1.38447  | 0.49127  |
| O | 0.00013  | -0.29563 | 0.20368  |
| C | 1.19541  | 0.42162  | 0.32035  |
| H | 1.28108  | 0.59958  | 1.41166  |
| H | 1.11027  | 1.39486  | -0.16544 |
| C | 2.35062  | -0.44200 | -0.14532 |
| H | 2.31249  | -1.41725 | 0.34742  |
| H | 2.28345  | -0.58409 | -1.22785 |
| C | 4.68748  | -0.38285 | -0.27418 |
| H | 4.75387  | -1.39256 | 0.14320  |
| H | 4.65692  | -0.45810 | -1.36578 |
| C | 5.87425  | 0.44514  | 0.16274  |
| H | 5.89115  | 0.51976  | 1.25289  |
| H | 5.79532  | 1.45184  | -0.25484 |
| H | 7.80239  | 0.32243  | -0.06901 |
| O | 7.04278  | -0.20839 | -0.31561 |
| O | 3.51772  | 0.26337  | 0.20125  |
| H | -7.78501 | 0.31289  | -0.39414 |

PEG\_5n\_wB97XD\_ox.log Energy: -530484.6044960

|   |         |         |          |
|---|---------|---------|----------|
| C | 6.36813 | 1.82760 | -0.03891 |
| H | 5.79986 | 2.51882 | -0.66662 |
| H | 6.30506 | 2.16633 | 0.99800  |
| C | 5.78874 | 0.43644 | -0.15793 |

|   |          |          |          |
|---|----------|----------|----------|
| H | 5.86269  | 0.08189  | -1.19137 |
| H | 6.33687  | -0.25848 | 0.48680  |
| C | 3.80056  | -0.75941 | 0.19553  |
| H | 3.84901  | -1.18165 | -0.81300 |
| H | 4.28163  | -1.45532 | 0.88992  |
| C | 2.36196  | -0.53389 | 0.59647  |
| H | 1.85046  | 0.11443  | -0.11672 |
| H | 2.28470  | -0.10636 | 1.59626  |
| O | 7.72375  | 1.76054  | -0.46429 |
| O | 4.43087  | 0.50225  | 0.23859  |
| O | 1.71890  | -1.81830 | 0.61224  |
| C | 0.40413  | -1.82718 | 0.80034  |
| H | 0.05643  | -2.79915 | 1.13276  |
| H | -0.00209 | -0.95416 | 1.30978  |
| C | -0.35913 | -1.71745 | -0.78306 |
| H | 0.05336  | -0.78407 | -1.16422 |
| H | -0.01626 | -2.63313 | -1.25163 |
| O | -1.67490 | -1.72995 | -0.60207 |
| C | -2.31205 | -0.47679 | -0.31448 |
| H | -1.95101 | 0.27530  | -1.01532 |
| H | -2.05257 | -0.18433 | 0.70507  |
| C | -3.80196 | -0.69813 | -0.43883 |
| H | -4.06285 | -0.96116 | -1.46850 |
| H | -4.11505 | -1.51328 | 0.22110  |
| C | -5.83221 | 0.43922  | -0.13919 |
| H | -6.14337 | 0.22962  | -1.16795 |
| H | -6.20341 | -0.36435 | 0.50551  |
| C | -6.38595 | 1.77074  | 0.31421  |
| H | -6.00615 | 2.56741  | -0.33022 |
| H | -6.06950 | 1.97176  | 1.34078  |
| H | -8.16664 | 2.53611  | 0.50077  |
| O | -7.80361 | 1.69024  | 0.23176  |
| O | -4.42023 | 0.51274  | -0.06165 |
| H | 8.11722  | 2.62661  | -0.34280 |

PEG\_6n\_wB97XD\_ox.log Energy: -627007.5357018

|   |          |          |          |
|---|----------|----------|----------|
| C | -9.38828 | 0.14412  | -0.55902 |
| H | -9.27728 | -0.01732 | -1.63426 |
| H | -9.44249 | 1.21933  | -0.37145 |
| C | -8.20236 | -0.44404 | 0.17113  |

|   |           |          |          |
|---|-----------|----------|----------|
| H | -8.14925  | -1.52394 | -0.00466 |
| H | -8.30124  | -0.27476 | 1.24881  |
| C | -5.86628  | -0.29067 | 0.31859  |
| H | -5.76759  | -1.37099 | 0.16904  |
| H | -5.91164  | -0.09318 | 1.39476  |
| C | -4.68523  | 0.42732  | -0.29380 |
| H | -4.63328  | 0.22640  | -1.36826 |
| H | -4.77563  | 1.50748  | -0.14362 |
| C | -2.35007  | 0.54182  | -0.16042 |
| H | -2.27306  | 0.39640  | -1.24182 |
| H | -2.31949  | 1.61176  | 0.06188  |
| C | -1.19799  | -0.16745 | 0.52348  |
| H | -1.11540  | -1.23494 | 0.31514  |
| H | -1.28801  | -0.04363 | 1.62184  |
| O | -10.55265 | -0.51090 | -0.07009 |
| O | -7.03446  | 0.18764  | -0.31736 |
| O | -3.51723  | -0.05722 | 0.34840  |
| O | 0.00083   | 0.48845  | 0.22419  |
| C | 1.17531   | -0.26851 | 0.18315  |
| H | 1.12281   | -1.07999 | 0.91669  |
| H | 1.14419   | -0.75209 | -0.81438 |
| C | 2.37876   | 0.63643  | 0.30398  |
| H | 2.30963   | 1.45054  | -0.42301 |
| H | 2.42329   | 1.06021  | 1.31138  |
| O | 3.49602   | -0.18202 | 0.04979  |
| C | 4.71548   | 0.52972  | 0.17801  |
| H | 4.81429   | 0.92585  | 1.19337  |
| H | 4.73726   | 1.36644  | -0.52712 |
| C | 5.83702   | -0.43889 | -0.12048 |
| H | 5.81011   | -1.27544 | 0.58577  |
| H | 5.72942   | -0.83886 | -1.13422 |
| C | 8.17619   | -0.55878 | -0.25198 |
| H | 8.19901   | -1.39322 | 0.45738  |
| H | 8.12117   | -0.97006 | -1.26574 |
| C | 9.41992   | 0.28692  | -0.09943 |
| H | 9.46226   | 0.70236  | 0.91051  |
| H | 9.39710   | 1.11234  | -0.81535 |
| H | 11.33549  | -0.03567 | -0.24373 |
| O | 10.53790  | -0.55874 | -0.34192 |
| O | 7.05566   | 0.26672  | 0.00136  |



H -11.31518 -0.13456 -0.51310
